# Supplementary material for: HRI coordinates translation necessary for protein homeostasis and mitochondrial function in erythropoiesis
Source: eLife. 2019 Apr 29;8:e46976. doi: 10.7554/eLife.46976 (PMC6533081; doi:10.7554/eLife.46976)
Supplement: Supplementary file 1. — Supplementary File 1a. Quality control and mapping of Ribo-seq and mRNA-seq. Supplementary File 1b. Complete gene list of differentially translated mRNAs. Supplementary File 1c. Eif2ak1, Ppp1r15a and Atf4 mRNAs are highly expressed in basophilic erythroblasts. Supplementary File 1d. Higher ribosome occupancy at the AUG of uORF1 in Atf4 mRNA.Supplementary File 1e. Complete gene list of differentially expressed mRNAs. [file elife-46976-supp1.xls]

## Sheet: a
		mRNA-seq						Ribo-seq
		Length(bp)	%GC	Reads(M)	Uniquely mapped(%)	Mapped to multiple loci(%)		Length(bp)	%GC	Reads(M)	Uniquely mapped(%)	Mapped to multiple loci(%)
1st set	Wt+Fe	50	53	33.8	55.7469	41.9523		29	57	9.7	8.7	44.7
	Wt-Fe	93	52	62.5	68.7698	29.4282		28	55	18.1	9.36006	33.4862
	Hri-/-+Fe	93	52	55.6	62.5617	35.2473		29	56	41.1	7.61519	44.3402
	Hri-/--Fe	93	52	66.6	63.4731	34.6061		29	56	33.7	9.1276	40.4181
2nd set	Wt+Fe	50	53	42.5	58.7594	39.2349		30	55	21.5	20.8023	52.6358
	Wt-Fe	50	53	38.3	61.9808	35.304		29	54	17	27.1008	45.2584
	Hri-/-+Fe	50	53	37.4	60.0012	37.6099		30	54	34.6	25.0564	54.6614
	Hri-/--Fe	38	54	29.4	53.8051	43.8945		30	54	30.9	27.4485	52.2246
3rd set	Wt+Fe	50	53	32	59.4514	37.4166
	Wt-Fe	50	53	45.1	63.3092	33.3086
	Hri-/-+Fe	50	53	42.8	59.7749	37.7063
	Hri-/--Fe	50	53	39.9	54.0913	43.1237
	Hri-/--Fe	50	52	46.5	61.8541	35.9223
Note:
Higher reads obtained in the Ribo-seq data from Hri-/- EBs as compared to those from Wt EBs are consistent with the increased translation of Hri-/- cells (Han et al. 2001) since HRI inhibits translation.

## Sheet: b
	Log2(FoldChange)				Adjusted p-value					Note:
Gene symbol	Hri-/-+Fe vs Wt+Fe	Hri-/--Fe vs Wt-Fe	Wt-Fe vs Wt+Fe	Hri-/--Fe vs Hri-/-+Fe	Hri-/-+Fe vs Wt+Fe	Hri-/--Fe vs Wt-Fe	Wt-Fe vs Wt+Fe	Hri-/--Fe vs Hri-/-+Fe		As determined using xtail package of R/Bioconductor, genes with reads greater than 50 at least in one of the conditions in each comparison were included in TE (translational efficiency) calculation. NA indicates that gene was not included in TE calculation due to reads below cut-off.
0610007P14Rik	-0.24046	1.93474	NA	0.947074	0.817756	0.00431894	NA	0.0540673
0610009B22Rik	-0.0782197	NA	NA	-0.902686	0.923735	NA	NA	0.115522
0610009O20Rik	-0.219113	0.192994	0.111588	0.501336	0.787861	0.689217	0.902669	0.186833
0610010K14Rik	0.742919	-0.236295	0.0914225	-0.911536	0.0731096	0.533662	0.87939	0.000246339
0610011F06Rik	1.57743	0.951664	0.949408	0.305238	0.00307246	0.0102271	0.143693	0.440876
0610031J06Rik	-0.0661679	1.57046	NA	0.768156	0.949972	0.000225781	NA	0.0247908
0610037L13Rik	-1.3214	NA	NA	-0.453104	0.026512	NA	NA	0.514638
1110001J03Rik	1.28345	-0.830799	1.26057	-0.872748	0.0151097	0.0486782	0.0143286	0.0251507
1110004E09Rik	0.948714	0.528904	NA	0.143889	0.337903	0.382636	NA	0.803375
1110004F10Rik	1.02262	-0.293811	-0.17812	-1.51703	0.0140663	0.527993	0.775354	1.37665e-07
1110008F13Rik	0.681854	0.882688	NA	-0.220627	0.158935	0.0163513	NA	0.481889
1110008P14Rik	0.752893	NA	NA	-0.396324	0.449848	NA	NA	0.495153
1110034G24Rik	-0.236472	1.80318	NA	-0.286156	0.795152	0.0147428	NA	0.591928
1110037F02Rik	-1.03875	-0.195214	-0.705916	0.114215	0.00198498	0.511006	0.0132832	0.68674
1110057K04Rik	1.24277	0.879433	NA	-0.14815	0.0222205	0.0240744	NA	0.683982
1110059G10Rik	-0.149305	-0.991201	0.203513	-0.666773	0.873237	0.0286397	0.823404	0.130748
1200014J11Rik	0.594157	-0.566244	0.235098	-0.94727	0.156346	0.0618497	0.616891	8.35013e-05
1300017J02Rik	-0.420745	-0.115063	-0.407184	-0.125016	0.140296	0.575612	0.0424292	0.498321
1600002H07Rik	0.534848	-0.403529	0.0978022	-0.862715	0.273663	0.290264	0.883739	0.00164031
1700017B05Rik	-1.3915	-0.599086	-0.632974	0.135726	3.21947e-05	0.0216436	0.0315476	0.648051
1700021F05Rik	-0.179154	-0.104832	NA	-0.495569	0.797302	0.865678	NA	0.328762
1700037H04Rik	0.74964	0.143556	-0.616052	-1.24535	0.0135346	0.61677	0.0337708	3.62802e-13
1700052N19Rik	-0.498363	0.220909	-0.147077	0.546107	0.366873	0.592981	0.821555	0.0998373
1810013L24Rik	-0.264689	0.655585	-0.346754	0.549843	0.498611	0.0032971	0.282256	0.00626639
1810022K09Rik	0.370614	NA	NA	-0.0525452	0.744607	NA	NA	0.966482
1810026J23Rik	-1.19545	-0.0402161	-1.14577	-0.0134694	0.00613997	0.942977	0.00542449	0.97502
1810030O07Rik	0.471919	NA	NA	-0.629338	0.665622	NA	NA	0.265587
1810037I17Rik	0.0489699	2.12766	NA	0.161165	0.942303	0.00010246	NA	0.703031
2010107E04Rik	0.520161	0.158044	-0.0633207	-0.44898	0.171798	0.643731	0.90592	0.0573461
2210016F16Rik	0.570906	0.70611	NA	0.368788	0.34037	0.0890378	NA	0.323315
2310011J03Rik	0.149513	NA	NA	-2.31629	0.846061	NA	NA	1.00887e-06
2310022A10Rik	1.21004	0.642796	NA	-0.18318	0.0349389	0.118669	NA	0.622754
2310022B05Rik	-0.0948527	0.808877	NA	0.392659	0.940157	0.163409	NA	0.43856
2310033P09Rik	0.519985	-0.478487	0.174444	-0.848621	0.330482	0.24931	0.798993	0.0120264
2310035C23Rik	-0.616055	-0.922549	NA	-0.673996	0.314335	0.0363326	NA	0.0967191
2310036O22Rik	0.596709	-0.097911	-0.061237	-0.779212	0.0935105	0.773871	0.903933	0.00018642
2310045N01Rik	-0.849167	-0.532643	-1.17048	-0.881552	0.0617243	0.216856	0.00520256	0.00828021
2310057M21Rik	0.404748	NA	NA	-1.27509	0.678922	NA	NA	0.0956758
2310067B10Rik	-0.969216	-0.602274	0.045065	0.390167	0.0935105	0.104826	0.944053	0.31221
2410004B18Rik	0.483521	NA	NA	-1.35502	0.537469	NA	NA	0.00181124
2410015M20Rik	0.780028	0.49766	-0.284381	-0.589455	0.0328807	0.0817889	0.509736	0.0103631
2410076I21Rik	-1.05059	-0.28745	-1.40612	-0.663789	5.71347e-05	0.271274	1.146e-10	0.00313674
2510003E04Rik	-0.264018	0.176381	0.113196	0.533013	0.620811	0.63132	0.843745	0.0771394
2610002M06Rik	0.536112	-0.234462	-0.156807	-0.950919	0.207482	0.540352	0.775354	0.000297489
2610507B11Rik	-0.619665	-1.28148	-0.0852668	-0.769999	0.265433	0.00141823	0.908319	0.0550816
2700029M09Rik	0.5053	0.175446	0.275778	-0.0778831	0.148857	0.518018	0.404112	0.759054
2700049A03Rik	-0.998248	-0.913242	-0.15106	-0.0886126	0.0536221	0.0110355	0.806281	0.840678
2700060E02Rik	1.04406	1.06963	NA	0.86761	0.247511	0.035384	NA	0.0445031
2700094K13Rik	-0.348443	NA	NA	-0.865811	0.615698	NA	NA	0.0563206
2700097O09Rik	-0.679055	-0.656943	-0.422625	-0.421531	0.168088	0.0907472	0.397459	0.274818
2810403A07Rik	0.323676	-0.593829	0.30722	-0.631314	0.631072	0.114999	0.645536	0.0612292
2810428I15Rik	-0.18029	0.564006	-1.62623	-0.903242	0.72138	0.18051	8.27555e-05	0.000693707
2810474O19Rik	-1.38007	-0.691739	-0.633018	0.0324258	4.51598e-05	0.00567992	0.0307474	0.922551
3110002H16Rik	-0.715729	-0.405814	-0.976836	-0.690722	0.00724657	0.0318305	4.51416e-08	2.25755e-05
4632428N05Rik	0.210498	0.935959	NA	0.1803	0.79297	0.0421626	NA	0.643921
4632434I11Rik	0.831797	0.0903622	NA	0.404949	0.451136	0.887998	NA	0.430688
4833420G17Rik	0.233077	-0.176381	1.16837	0.741126	0.825429	0.696986	0.101115	0.0434734
4921524J17Rik	1.10664	NA	NA	-1.12103	0.343705	NA	NA	0.126448
4930430F08Rik	0.288877	0.0889592	0.25775	0.0356265	0.555014	0.820078	0.583119	0.933018
4930523C07Rik	1.30586	NA	NA	-1.30277	0.230661	NA	NA	0.108171
4930579G24Rik	0.528076	NA	NA	-1.15491	0.402607	NA	NA	0.00151373
4931406P16Rik	-1.08301	-0.691582	-0.564039	-0.195207	0.0182687	0.0324939	0.196576	0.594563
4932438A13Rik	-1.41958	-0.98761	-0.530731	-0.122635	0.00366292	0.00876099	0.274851	0.795187
4933426M11Rik	1.28337	0.504818	1.15509	0.351073	0.0798945	0.209829	0.166378	0.329331
5730508B09Rik	0.708345	0.678199	-0.29807	-0.350388	0.0595767	0.0146441	0.485212	0.133217
5830415F09Rik	-1.20278	-0.350411	NA	-0.408464	0.0376288	0.503083	NA	0.3412
5830418K08Rik	-1.02771	-0.558232	-0.912444	-0.465577	0.0106846	0.101287	0.0139823	0.134669
6030458C11Rik	0.262196	0.723903	-0.379402	0.0602209	0.572861	0.0118471	0.389206	0.836686
6030468B19Rik	0.0124473	0.295628	-0.64857	-0.389101	0.975175	0.163409	0.00296694	0.0252133
8030462N17Rik	0.496105	0.102079	0.155679	-0.260373	0.279313	0.798966	0.782435	0.372329
8430419L09Rik	-0.0335012	0.463721	-0.026055	0.448191	0.944149	0.0363086	0.950037	0.027459
9030624J02Rik	-0.53364	-0.476274	0.0771663	0.111443	0.175768	0.071396	0.869926	0.700754
9430016H08Rik	0.626594	-0.0160147	NA	0.0398126	0.423088	0.985432	NA	0.94717
9530068E07Rik	0.760106	-0.171429	0.795667	-0.157848	0.13549	0.64839	0.0863976	0.631344
A430005L14Rik	0.173092	0.329982	-0.77136	-0.638422	0.736891	0.429244	0.08731	0.0247318
A630007B06Rik	0.0727094	0.0830278	-0.0198826	-0.0250613	0.917525	0.870915	0.987159	0.955141
A830080D01Rik	0.00148112	-1.13773	0.276136	-0.884849	0.994643	0.00432711	0.700691	0.01773
AA986860	-0.493692	-0.268534	-0.454043	-0.252105	0.275476	0.47443	0.289887	0.441462
Aaas	0.411605	0.161524	0.228776	-0.043376	0.367876	0.656649	0.646964	0.897896
Aagab	0.631312	0.139921	0.43543	-0.0765169	0.226226	0.72864	0.42252	0.825183
Aamp	-0.488454	0.0387572	-0.0714075	0.432782	0.241696	0.913893	0.89551	0.0773002
Aar2	-0.0292389	1.29878	NA	0.932368	0.978458	0.00259853	NA	0.00779634
Aars	-0.663271	-0.369795	0.109135	0.378942	0.00685744	0.0116716	0.662518	0.00883319
Aarsd1	0.511063	0.355846	0.504967	0.328306	0.233878	0.215872	0.209559	0.234011
Aasdhppt	0.459819	0.46276	NA	0.118665	0.511912	0.338673	NA	0.816457
Aatf	-0.0162136	0.470265	NA	0.204212	0.995211	0.50591	NA	0.75318
Abca3	-0.515292	-0.88423	1.17779	0.78896	0.38866	0.0012417	0.00274073	0.00965142
Abca7	-1.43052	-0.976609	-0.618986	-0.18922	3.10132e-06	4.59818e-06	0.0115317	0.471079
Abcb10	-0.236497	0.0744569	-0.00374458	0.283788	0.373472	0.692495	0.994688	0.0341225
Abcb4	-0.393296	-0.2303	0.0228628	0.163173	0.407747	0.491617	0.96607	0.60701
Abcb6	-0.139579	-0.403675	0.615277	0.328183	0.744607	0.0561036	0.0181698	0.118886
Abcb7	-0.108765	-0.00304304	0.296793	0.379255	0.784966	0.993917	0.258223	0.0535384
Abce1	0.363649	0.505867	0.695431	0.81474	0.361523	0.0248377	0.0219716	3.68569e-05
Abcf1	-0.241138	-0.461865	0.283319	0.0395545	0.50603	0.0328214	0.294731	0.883624
Abcf2	0.0167503	-0.0172299	0.792442	0.734985	0.972987	0.958795	0.00772602	0.00139675
Abcf3	-0.764888	-0.317257	-0.48779	-0.0639293	0.068491	0.365557	0.229561	0.861097
Abcg2	-0.066564	0.162138	-0.036084	0.168925	0.830822	0.304914	0.90592	0.240514
Abcg4	0.945525	0.00104052	1.37811	0.417338	0.1113	0.996614	0.00449942	0.15727
Abhd10	0.11936	0.325455	NA	-0.496886	0.873344	0.591359	NA	0.214638
Abhd16a	-0.188401	0.0468288	NA	0.157953	0.861465	0.93576	NA	0.749243
Abhd2	0.0129013	-0.471248	0.752057	0.237003	0.972362	0.169305	0.109594	0.503352
Abhd4	-0.852451	0.495245	-1.34077	-0.0150415	0.084422	0.197384	0.00238385	0.9732
Abhd5	0.468036	-0.0662775	0.351053	-0.206205	0.217918	0.837144	0.327937	0.396893
Abi1	0.153426	-0.0726072	NA	-0.198281	0.841991	0.903914	NA	0.644664
Abracl	2.5181	0.452743	NA	0.492393	0.00908284	0.400592	NA	0.283953
Abt1	-1.00421	-0.953713	NA	-0.778231	0.067914	0.0404224	NA	0.0758386
Abtb1	-0.889911	-0.118663	-0.986556	-0.239214	0.00155745	0.638665	1.13021e-06	0.242926
Acaa2	1.09256	0.0195171	1.19438	0.100699	0.0096944	0.964373	0.00145134	0.765912
Acad9	0.153339	1.21954	NA	0.277047	0.838109	0.00518284	NA	0.561597
Acadl	0.338398	-0.247787	0.78059	0.170532	0.425644	0.366618	0.0166365	0.531516
Acadsb	-0.190106	0.725968	-0.901838	-0.00885541	0.699375	0.0250786	0.0187233	0.977685
Acadvl	-0.85733	-0.493356	-0.393875	-0.0533443	0.00222921	0.0170795	0.0798229	0.828197
Acap3	0.350988	NA	NA	-1.34482	0.697429	NA	NA	0.00913157
Acat1	2.11579	-0.208193	2.2825	-0.0575726	0.00391886	0.62277	0.000551488	0.893774
Acbd3	-0.174362	-0.485284	NA	-0.245569	0.86395	0.352596	NA	0.627179
Acbd4	-0.670554	0.278628	-1.77525	-0.849305	0.0774699	0.485867	1.2258e-07	0.00079581
Acbd5	0.119412	0.75798	NA	-0.184398	0.875311	0.106902	NA	0.643681
Acer3	0.958798	1.71123	NA	0.819068	0.271305	0.000430549	NA	0.0268572
Ache	-0.156513	-0.21006	-0.397276	-0.473379	0.740363	0.492858	0.304501	0.0347945
Acin1	-1.03452	-0.972018	-0.311851	-0.273076	9.66936e-05	2.37714e-08	0.14531	0.177852
Ackr1	-0.462788	0.489453	-0.645843	0.283254	0.128725	0.0133729	0.0027987	0.12907
Acly	0.0254345	0.163779	0.791881	0.908262	0.963001	0.585685	0.0355515	5.16591e-05
Acmsd	-0.0967982	NA	NA	-1.1286	0.90354	NA	NA	0.00390341
Aco2	-0.372991	-0.135449	0.221645	0.435591	0.205773	0.515525	0.322034	0.00869348
Acot11	-0.246331	-0.419809	0.434463	0.237434	0.589316	0.107137	0.221542	0.362686
Acot13	0.930281	0.603944	NA	-0.844308	0.0641886	0.174552	NA	0.0183233
Acot8	-0.121962	-0.789459	0.160489	-0.528882	0.835522	0.00964999	0.768209	0.0629666
Acox1	-0.301597	-0.155265	-0.229907	-0.10573	0.60121	0.727844	0.703103	0.779804
Acp1	0.713279	0.528318	0.0416675	-0.166331	0.0747615	0.0817889	0.940423	0.54909
Acp5	0.485463	0.309355	0.373926	0.174615	0.10797	0.0937419	0.107121	0.330809
Acsl1	-0.333666	-0.497666	0.219532	0.0328929	0.453422	0.057991	0.604424	0.918029
Acsl3	-1.31258	0.463885	NA	1.17732	0.0392465	0.389199	NA	0.00550527
Acsl4	-0.533216	-0.568991	0.248202	0.186895	0.280454	0.0880013	0.624371	0.610899
Acsl5	-0.389579	-0.414595	-0.197058	-0.245415	0.300408	0.0996903	0.566594	0.325169
Acss1	-0.261209	-0.0372286	0.23351	0.434475	0.488231	0.896615	0.428619	0.0294704
Acss2	-0.308969	0.138246	0.366323	0.790697	0.550872	0.679245	0.395666	0.00162808
Actb	0.651789	1.36898	0.0657297	0.759453	0.00152928	3.68229e-30	0.894621	6.18931e-11
Actg1	-0.752745	0.442598	NA	0.31995	0.200239	0.381141	NA	0.410344
Actl6a	0.664844	-0.0413133	0.469469	-0.259405	0.0597631	0.896774	0.14531	0.242515
Actn4	-0.261103	-0.505487	0.468453	0.20045	0.376573	0.00124229	0.0134648	0.234011
Actr10	0.121493	-0.0825398	0.124303	-0.103467	0.790732	0.802856	0.779396	0.710625
Actr1a	0.575849	-0.183269	0.744676	-0.0376107	0.110581	0.477988	0.0092778	0.890619
Actr1b	1.02868	NA	NA	-0.746893	0.337814	NA	NA	0.195596
Actr2	0.675641	0.556882	0.425825	0.284076	0.0730647	0.0224082	0.238539	0.218679
Actr3	-0.486767	0.679488	NA	1.1137	0.569774	0.118776	NA	0.00285749
Actr6	-0.506931	NA	NA	-0.288692	0.563019	NA	NA	0.657872
Actr8	0.147323	0.492724	NA	0.482443	0.865111	0.23985	NA	0.209106
Acyp1	0.129189	-0.145992	-0.78612	-1.08546	0.79222	0.718908	0.0424292	0.000232971
Acyp2	-0.207953	NA	NA	-1.61044	0.854928	NA	NA	0.0244142
Adam10	0.00961912	0.248864	0.356463	0.571917	0.978057	0.123836	0.0714938	2.61326e-05
Adam17	-0.266083	-0.0934124	NA	0.352307	0.779047	0.86997	NA	0.442101
Adar	-0.732631	-0.544047	-0.253441	-0.0886206	0.0328971	0.0605233	0.466792	0.770815
Adcy6	-0.133292	-0.330771	0.202806	-0.01522	0.874317	0.424168	0.790136	0.973299
Adcy7	-1.29438	-0.67963	-0.0282955	0.562801	0.000896884	0.00700703	0.954221	0.0415183
Add1	-0.553925	-0.130545	0.085395	0.484995	0.0271246	0.444635	0.738869	0.000330736
Add2	-0.579173	-0.211772	-0.507652	-0.163923	0.0181506	0.209041	0.00574301	0.300944
Add3	-0.947809	0.121443	-0.417665	0.629119	0.0261191	0.748069	0.327937	0.0344726
Adh5	-0.190738	-0.380677	-0.231336	-0.447052	0.732738	0.357587	0.672444	0.225384
Adipor1	-0.351351	1.37619	-1.45262	0.251616	0.339221	3.11414e-09	2.67272e-07	0.260706
Adipor2	-0.271247	-0.0458695	-0.0396654	0.164029	0.646979	0.923224	0.954221	0.657254
Adk	0.140585	0.157261	-0.00250189	-0.00799652	0.717079	0.571192	0.996798	0.975561
Adnp	-0.50822	-0.58688	0.145394	0.0438843	0.255257	0.0394315	0.767907	0.902121
Adprh	0.0699913	0.212449	0.399439	0.517466	0.913664	0.60041	0.472384	0.108234
Adra2b	-0.359473	0.688409	-0.263973	0.761607	0.391958	0.00457467	0.518652	0.000253578
Adrb2	-0.0362482	0.136189	-1.4067	-1.25675	0.941216	0.706445	6.38863e-06	1.36256e-09
Adrbk1	-0.639702	-0.333829	0.049188	0.332588	0.267249	0.424391	0.941628	0.362623
Adrm1	0.841705	0.188613	1.14409	0.469492	0.0997585	0.608246	0.00984444	0.0962267
Adsl	0.307678	0.333263	0.0853383	0.0906249	0.572622	0.350749	0.898652	0.815888
Adss	0.337845	0.412103	0.665849	0.714421	0.64614	0.329341	0.358678	0.03309
Aes	0.333876	2.58041	NA	1.46171	0.744607	1.39945e-08	NA	5.15271e-06
Aff1	-1.24145	-0.913295	-0.854903	-0.550631	1.70765e-07	1.02324e-08	5.14376e-07	0.000701015
Afg3l1	0.419552	0.262449	0.176145	-0.00378254	0.418007	0.486979	0.770913	0.990976
Afg3l2	-0.224804	-0.243333	0.308349	0.266017	0.542134	0.275069	0.235298	0.205542
Afp	-0.525197	-0.487321	0.958401	0.982857	0.399194	0.0912069	0.0329979	0.000337754
Aftph	-0.769764	-0.012915	-0.101977	0.632164	0.0899872	0.978783	0.860896	0.0196662
Agfg1	0.408242	0.864287	-0.0338799	0.398712	0.177541	2.26904e-07	0.92298	0.0122537
Agfg2	-0.0669088	-0.0312021	0.239324	0.252181	0.901123	0.93252	0.568962	0.321053
Aggf1	0.181977	NA	NA	-0.890383	0.837379	NA	NA	0.0745255
Ago2	-0.689153	0.0824554	0.319428	1.068	0.0451596	0.760975	0.281724	1.72478e-08
Agpat4	0.19516	0.159082	0.0236449	-0.0355183	0.648771	0.5711	0.958741	0.898158
Agpat5	1.58149	-0.198937	NA	-0.616058	0.0549518	0.745573	NA	0.174203
Agps	0.150863	0.157155	NA	0.671483	0.882331	0.769024	NA	0.103519
Ahctf1	-1.21286	-0.463305	-0.519585	0.205922	5.34306e-06	0.019651	0.0108402	0.331837
Ahcyl1	0.418994	0.026041	0.702098	0.287459	0.392054	0.945563	0.0920769	0.301402
Ahcyl2	0.267696	0.44216	0.668554	0.821289	0.690424	0.222601	0.2347	0.00642309
Ahi1	-1.1668	-0.385465	-0.23831	0.520006	0.00219991	0.19385	0.560339	0.0598416
Ahsa1	0.0193095	0.410631	-0.65133	-0.283743	0.959304	0.0330952	0.00141832	0.092588
Ahsa2	1.56402	-0.272984	1.55999	-0.302878	0.00786852	0.486572	0.0102038	0.367458
AI314180	-1.05743	-0.173659	-0.210272	0.650106	0.000647138	0.512812	0.476231	0.00218862
AI462493	1.19673	NA	NA	-2.0179	0.269107	NA	NA	0.0120155
AI837181	1.76608	0.680911	NA	-0.303117	0.104169	0.268867	NA	0.516717
Aifm1	-0.52211	-0.475138	-0.056624	-0.0293178	0.230717	0.135666	0.92298	0.93618
Aimp1	0.618197	1.14505	-0.154997	0.348305	0.151201	5.09646e-05	0.785581	0.230412
Aimp2	0.827481	0.252151	0.37641	-0.22153	0.0467976	0.443843	0.425632	0.378833
Aip	-0.0310919	-0.239658	-0.151824	-0.382717	0.957295	0.527316	0.781995	0.172679
Ak2	0.589354	0.101215	0.0424149	-0.469297	0.135592	0.781181	0.937801	0.0507784
Ak3	1.68798	0.30073	NA	0.312608	0.0989409	0.605519	NA	0.504912
Ak6	0.523106	1.69164	-1.45775	-0.306661	0.221141	1.65657e-06	0.000595889	0.404995
Akap10	0.255908	-0.109361	NA	0.0868483	0.766503	0.845245	NA	0.853669
Akap11	-1.01843	-0.134321	-0.426557	0.435685	0.0327209	0.741456	0.360854	0.187603
Akap13	-1.47062	-1.1398	-0.975316	-0.668086	6.76383e-10	3.30232e-12	8.42131e-09	8.72612e-05
Akap7	0.119398	0.0947988	-0.645237	-0.691683	0.821648	0.826893	0.148124	0.00905955
Akap8	-0.462266	-0.604341	-0.296776	-0.462016	0.26951	0.0305264	0.456108	0.0768435
Akap8l	-0.669553	-0.873585	-0.606896	-0.833893	0.0862363	0.00105307	0.0759863	0.000587538
Akap9	-1.6809	-0.987718	-1.2596	-0.592787	1.14045e-06	0.000777206	1.25425e-05	0.0538486
Akip1	0.192077	-0.578301	-0.264492	-1.05835	0.691089	0.0960288	0.587597	0.000112698
Akirin1	0.285152	1.2175	NA	-0.00720628	0.678693	0.0173108	NA	0.985085
Akirin2	0.127368	-0.277837	-0.187754	-0.616069	0.806299	0.430002	0.719665	0.0186888
Akr1a1	0.0575487	-0.278947	0.132968	-0.22684	0.91466	0.405432	0.800977	0.443596
Alad	0.219866	0.0656301	0.217652	0.040101	0.375401	0.714047	0.404112	0.800933
Alas2	-0.656481	0.269421	-0.751573	0.150179	0.00135967	0.198688	0.0306098	0.33904
Alb	0.202996	-0.246069	0.921158	0.459899	0.75396	0.467663	0.0501805	0.0940111
Aldh16a1	-0.0433898	0.102066	0.623155	0.746847	0.956671	0.804238	0.216751	0.0126928
Aldh18a1	-0.236876	0.576802	-0.00961661	0.781979	0.725624	0.056921	0.995935	0.0141863
Aldh2	-0.311108	-0.218509	0.119405	0.188714	0.466474	0.430899	0.784282	0.464512
Aldh9a1	0.100785	0.213499	0.532081	0.621914	0.808358	0.356552	0.0392326	0.000798367
Aldoa	0.848661	0.879508	0.51267	0.521363	0.0253385	9.43067e-05	0.152992	0.0149714
Alg8	0.922242	1.28655	NA	0.491775	0.130988	0.000583074	NA	0.192206
Alg9	1.09526	NA	NA	-0.713537	0.289931	NA	NA	0.195254
Alkbh5	-0.0736752	0.507367	-0.250749	0.309151	0.919247	0.191413	0.719214	0.367404
Alkbh7	1.65983	0.489263	NA	0.127468	0.174717	0.563438	NA	0.880473
Alkbh8	-1.40166	-0.715559	-0.677042	-0.0141121	0.00131903	0.045433	0.10652	0.97502
Alms1	-2.13259	-0.72004	-0.432537	0.95526	1.52044e-06	0.0228424	0.327391	0.00283577
Alyref	0.681586	0.302071	0.342115	-0.0606518	0.0168462	0.129349	0.156164	0.774853
Ambra1	-1.42115	-0.0967533	-0.684165	0.616958	0.00274272	0.83682	0.143193	0.068499
Amfr	0.270078	0.900445	0.54877	1.15643	0.565947	2.97375e-05	0.137591	4.55283e-09
Ammecr1	0.324341	0.738245	0.393846	0.78579	0.525678	0.00901246	0.396913	0.0011792
Amot	-0.944169	-0.40324	0.264175	0.782625	0.019885	0.163409	0.538212	0.00124278
Ampd2	0.120071	-0.0314502	0.626466	0.452718	0.814676	0.918902	0.0567809	0.0481548
Ampd3	-0.0871604	-0.30906	-0.144559	-0.389843	0.828126	0.171602	0.638519	0.0502769
Anapc1	-0.660501	-0.388114	0.317442	0.566829	0.0406504	0.0605072	0.216751	0.00380814
Anapc11	0.0160109	0.941812	NA	-0.379991	0.964622	0.0885401	NA	0.315275
Anapc13	0.858052	0.679412	NA	-1.08397	0.0536221	0.110588	NA	0.000135369
Anapc16	0.357992	NA	NA	-1.66425	0.620927	NA	NA	8.95001e-05
Anapc2	-0.817116	-0.614611	0.0935956	0.272653	0.00605019	0.00178062	0.761429	0.19432
Anapc4	0.959214	0.155208	1.1285	0.304895	0.133848	0.748069	0.0671312	0.460696
Anapc5	0.387898	-0.061335	0.614072	0.142225	0.277219	0.821851	0.0184478	0.537744
Anapc7	0.124023	-0.193042	0.276125	-0.0634341	0.816648	0.571607	0.557408	0.836686
Ank	-0.0768842	0.0953698	0.105688	0.255399	0.93428	0.844313	0.908319	0.514638
Ank1	-1.38652	-0.765141	-0.448628	0.14941	1.3333e-12	2.71932e-08	0.164869	0.301196
Ankfy1	-0.304614	-0.472682	0.255552	0.0637544	0.392479	0.0249761	0.361638	0.798902
Ankhd1	-1.50979	-0.539935	-0.609243	0.337111	3.35205e-07	0.0150274	0.0109072	0.140072
Ankle1	-0.330232	-0.701403	-0.922334	-1.31671	0.445342	0.0181079	0.00999245	3.01029e-09
Ankle2	-0.766327	-0.426012	0.199168	0.516315	0.0655457	0.132267	0.645916	0.0553969
Ankrd11	-1.2783	-0.687167	-0.957508	-0.389157	0.000263416	0.0151368	0.00136245	0.168743
Ankrd13a	0.537098	0.296486	0.942492	0.681074	0.346989	0.400141	0.0494866	0.0139587
Ankrd13c	-0.16673	NA	NA	-0.253097	0.875311	NA	NA	0.677107
Ankrd17	-1.25548	-0.621197	-0.263063	0.347916	4.33367e-05	0.00473687	0.345217	0.137592
Ankrd26	-1.66664	-1.33333	-1.07856	-0.761715	0.000925542	0.00164157	0.016516	0.145474
Ankrd27	-0.227078	-0.166479	0.287256	0.326878	0.777335	0.729439	0.674492	0.450587
Ankrd32	-0.6495	0.24093	0.172243	1.04105	0.235406	0.557262	0.772433	0.00131305
Ankrd49	-1.24669	NA	NA	-0.135323	0.0345269	NA	NA	0.847611
Ankrd52	-0.539997	0.357363	0.441058	1.31671	0.314335	0.26189	0.34412	4.01241e-07
Ankrd54	0.994097	-0.0471249	0.241108	-0.822546	0.0324386	0.925106	0.700632	0.00223167
Ankrd9	0.334163	0.272926	0.168756	0.0850246	0.562493	0.484449	0.79725	0.811959
Ankzf1	-0.0924545	NA	NA	-0.690721	0.940157	NA	NA	0.231013
Anln	-0.489821	0.0352644	-0.199509	0.302277	0.0821398	0.881109	0.377389	0.0769731
Anp32a	0.154367	-0.528516	0.533236	-0.172808	0.698407	0.0137841	0.0369851	0.460691
Anp32b	0.672662	-0.0156842	0.969529	0.257805	0.0120484	0.944091	4.42876e-08	0.10083
Anp32e	-0.106875	-0.449296	-0.0517879	-0.417668	0.744714	0.0087383	0.855068	0.00790229
Anxa7	-0.125082	0.166921	-0.0057094	0.262844	0.719737	0.424613	0.988776	0.134001
Ap1b1	-0.969859	-0.479886	-0.0874678	0.378802	7.82378e-05	0.00220384	0.732639	0.0164499
Ap1g1	0.717961	-0.118728	NA	-0.419272	0.390408	0.845062	NA	0.291798
Ap1g2	-0.142038	-0.777537	0.633508	-0.0231255	0.845258	0.0286397	0.21391	0.957804
Ap1m1	0.705124	0.242599	1.02293	0.538687	0.144592	0.454514	0.012142	0.0347711
Ap1s1	1.3542	1.34766	-0.122078	-0.151987	0.000970632	1.46993e-05	0.868743	0.595454
Ap2a1	-0.571517	0.215479	0.173175	0.936552	0.0515694	0.269281	0.473478	3.05365e-09
Ap2a2	-0.0386279	-0.178064	0.71694	0.554098	0.920334	0.36303	0.000148078	0.000560898
Ap2b1	-0.409269	0.0617824	0.340213	0.787701	0.265977	0.818344	0.238539	4.82033e-05
Ap2m1	0.338353	1.2625	0.03539	0.936395	0.396866	4.47036e-09	0.941433	1.35917e-06
Ap2s1	0.156757	0.118731	-0.711549	-0.773224	0.624367	0.620969	0.000296912	6.97064e-07
Ap3b1	-1.1869	-0.484359	0.263321	0.942725	0.00919984	0.0994705	0.560838	0.00119617
Ap3d1	-0.36175	-0.745524	0.417027	0.00951858	0.425644	0.00452315	0.278408	0.975706
Ap3m1	0.819018	NA	NA	-0.500791	0.348814	NA	NA	0.371525
Ap4b1	-0.038647	-0.708303	0.0689065	-0.623319	0.956355	0.0376755	0.91295	0.0491661
Ap4e1	-0.759206	0.0222833	-0.0415209	0.722915	0.204075	0.970468	0.957174	0.0526752
Ap5m1	-0.321284	NA	NA	-0.893638	0.700193	NA	NA	0.155581
Ap5s1	-0.637329	-0.392596	-1.51252	-1.29066	0.186924	0.463934	0.000689367	6.6356e-05
Apaf1	-0.251298	-0.331644	0.360771	0.258393	0.76963	0.45263	0.63356	0.526755
Apeh	-0.340096	-0.49606	0.205096	0.0252042	0.181385	0.000255498	0.357823	0.88928
Apex1	0.737412	-0.750676	1.22577	-0.273337	0.352135	0.298267	0.234967	0.685828
Apex2	-0.783277	-0.590975	0.12405	0.288948	0.130871	0.0895971	0.839111	0.434064
Api5	-0.0232109	-0.361149	0.489294	0.128413	0.96206	0.13663	0.0970304	0.618482
Apip	-0.123078	-0.562446	-0.123433	-0.583833	0.81636	0.0986286	0.81833	0.0672918
Aplf	-1.17808	-0.230944	-0.809042	0.111956	0.00223467	0.512812	0.01981	0.751957
Aplp2	-0.258267	-0.0112597	-0.19111	0.0327569	0.402011	0.965009	0.415212	0.881305
Apmap	-0.130118	-0.213591	0.222591	0.114895	0.869312	0.627662	0.760162	0.783735
Apoa1bp	0.0850732	0.951181	NA	-0.0543473	0.909364	0.0907472	NA	0.914221
Apobec3	0.243856	0.186146	0.00817468	-0.0653429	0.633485	0.613018	0.988776	0.843248
Apol11b	-0.6804	0.165115	NA	-0.812187	0.280636	0.836217	NA	0.0548342
Apol8	-1.36645	-1.17271	-1.11602	-0.945796	1.61549e-07	4.33694e-09	1.67538e-09	1.0033e-06
Apool	-0.0210482	-0.462626	0.0750973	-0.378922	0.98639	0.329336	0.924616	0.404995
Appbp2	-0.081211	-0.0795131	0.596926	0.571988	0.91713	0.858737	0.252014	0.124517
Aprt	0.32198	0.594571	NA	0.515583	0.673148	0.249518	NA	0.253033
Aqp1	0.232831	0.870779	-0.391934	0.223413	0.606642	0.00022479	0.343691	0.338168
Aqp3	-0.142568	0.895208	-0.263023	0.75163	0.784189	0.000453545	0.556344	0.00131997
Aqr	-0.772012	-0.292887	0.451481	0.907613	0.0553442	0.273721	0.183521	0.000120091
Araf	2.01159	NA	NA	-1.74042	0.0212627	NA	NA	0.000207939
Arcn1	0.355916	0.34239	-0.0722592	-0.108664	0.332991	0.180073	0.870624	0.663868
Arel1	-0.0645538	-0.143638	-0.172986	-0.27492	0.905434	0.675331	0.719728	0.305252
Arf1	0.985271	0.886229	0.392559	0.271354	0.0330067	0.00390199	0.457358	0.345371
Arf2	-0.0536803	0.00673149	-0.687958	-0.648145	0.922461	0.991648	0.0914951	0.015167
Arf4	0.648345	-0.705033	0.832628	-0.542669	0.166615	0.0209488	0.0430051	0.0530581
Arf5	0.69199	1.74236	-0.543952	0.482585	0.00376567	4.26546e-41	0.00297595	9.88475e-05
Arf6	0.33048	-0.494966	1.23012	0.381224	0.404125	0.0220193	9.7199e-07	0.0798751
Arfgap1	0.960853	0.216842	0.616314	-0.150559	0.0971307	0.624753	0.387639	0.675553
Arfgap2	-0.42094	0.541205	-0.654162	0.285254	0.368649	0.099313	0.122082	0.345435
Arfgap3	-0.572681	-0.0328132	-0.759627	-0.242212	0.16484	0.945563	0.0523284	0.411053
Arfgef1	-0.45279	0.398347	0.134351	0.964007	0.566954	0.349406	0.87939	0.00573634
Arfgef2	-1.04264	-0.572235	-0.137525	0.309559	0.00488868	0.035384	0.754573	0.271116
Arfrp1	0.089888	1.31398	NA	-0.146197	0.925344	0.103358	NA	0.799422
Arglu1	0.442611	0.410464	0.0711347	0.0150517	0.343644	0.21767	0.908319	0.966482
Arhgap1	-0.195711	0.829714	-0.92872	0.0740908	0.699375	0.0116716	0.0210537	0.827072
Arhgap11a	-0.847362	-0.476167	0.144635	0.492316	0.00406117	0.0160222	0.599968	0.0106917
Arhgap17	0.0539827	0.232689	0.110226	0.266512	0.922461	0.485867	0.839199	0.35467
Arhgap19	0.370474	-0.104277	0.319085	-0.179144	0.301316	0.699869	0.288842	0.426857
Arhgap21	-1.19105	-1.27971	-0.218999	-0.331215	0.00014379	4.48276e-09	0.466792	0.187055
Arhgap23	-1.47718	-0.937052	-0.238378	0.278556	4.57663e-06	1.75684e-05	0.432067	0.289334
Arhgdia	1.12553	0.389128	0.142638	-0.616984	0.000101242	0.0916509	0.694376	0.000472751
Arhgef1	-0.511653	-0.0645029	0.333666	0.758321	0.264238	0.860194	0.431822	0.00255132
Arhgef12	-0.660037	-0.589248	-0.513478	-0.465847	0.0382045	0.0110673	0.0529868	0.0268806
Arhgef39	-0.080783	0.391835	-0.675912	-0.225377	0.884222	0.220312	0.0980225	0.422452
Arhgef40	-1.36017	-0.663409	-0.330177	0.344936	0.0578656	0.151441	0.686028	0.552843
Arhgef7	0.767707	0.0987277	NA	-0.48443	0.309093	0.88129	NA	0.241398
Arid1a	-1.51285	-0.498187	-0.409616	0.580939	1.14922e-05	0.0541234	0.190632	0.0270074
Arid1b	-1.31222	-0.855402	-0.407532	0.0233066	0.00191151	0.00720399	0.348595	0.952027
Arid2	-1.30844	-0.532895	-0.343219	0.409263	0.000141448	0.0365643	0.296643	0.110778
Arid3b	-0.4575	-0.308103	-0.362014	-0.234254	0.46652	0.520592	0.59246	0.568038
Arid4a	-1.16234	-0.470725	-0.428442	0.240085	0.0006769	0.0768669	0.175567	0.389442
Arid4b	-0.311613	-1.22804	0.345289	-0.593428	0.582945	3.06596e-05	0.460983	0.0612292
Arih1	-0.0398068	0.20504	0.498707	0.721	0.947935	0.507872	0.220905	0.00255132
Arl2	0.725865	0.718473	NA	-0.500359	0.240273	0.129777	NA	0.165261
Arl3	1.17648	0.025294	0.740099	-0.429686	0.0384022	0.972816	0.307738	0.270016
Arl4a	-0.215136	-0.629265	-1.49517	-1.933	0.530881	0.0118591	2.31193e-11	7.7949e-27
Arl6ip1	0.0895655	0.513407	-0.228605	0.171935	0.797302	0.00411549	0.316947	0.33904
Arl6ip4	-0.0926352	NA	NA	-1.72804	0.932486	NA	NA	0.0287321
Arl6ip5	0.0642974	-0.437192	-0.30604	-0.829665	0.907258	0.195748	0.507402	0.00169401
Arl6ip6	0.276403	1.04121	-0.613316	0.130538	0.628099	0.00321293	0.286736	0.711041
Arl8b	1.12224	0.713416	NA	-0.189096	0.0444606	0.0779163	NA	0.604488
Armc1	1.24268	0.337158	0.752996	-0.175224	0.00184665	0.272271	0.0687052	0.513272
Armc5	-0.773551	-0.0667296	NA	0.386743	0.290171	0.915065	NA	0.418733
Armc6	0	0.219174	NA	0.236942	0.99528	0.713005	NA	0.642474
Armc8	0.00368248	-0.616866	0.829518	0.177293	0.985555	0.0784692	0.090185	0.635228
Armc9	-1.28382	-0.915476	-0.0843383	0.263875	0.0715345	0.0380873	0.929535	0.631963
Arnt	-0.137803	0.141294	-0.0761324	0.179996	0.779364	0.654983	0.885884	0.499814
Arpc1a	1.62742	0.877669	1.3728	0.602245	0.0048557	0.00631065	0.0127961	0.0466577
Arpc2	0.464728	0.340531	-0.0100147	-0.156139	0.375772	0.374585	0.994688	0.648051
Arpc3	0.16379	-0.155377	-0.392978	-0.73554	0.599214	0.463934	0.0518008	1.30725e-06
Arpc4	0.327608	0.0366292	-0.139838	-0.454297	0.349151	0.909411	0.700691	0.0295761
Arpc5	0.524238	0.560855	-0.954976	-0.940925	0.159348	0.0755074	0.00664193	1.458e-05
Arpc5l	5.05751	1.10715	NA	-0.0315169	1.02652e-05	0.0156316	NA	0.945811
Arpp19	0.383585	0.102075	-0.859036	-1.16423	0.333345	0.807922	0.0195788	1.07187e-06
Arrb1	-1.4412	-0.940349	-1.43032	-0.952667	6.54758e-11	3.51331e-09	1.2545e-17	1.07591e-10
Arrdc2	-0.931992	-0.41625	-0.942732	-0.449604	0.0731515	0.326967	0.0538945	0.202939
Arrdc3	-0.561979	-0.0319764	-1.00949	-0.502535	0.244089	0.951207	0.0181339	0.0857698
Art4	0.334331	0.555872	-0.742985	-0.544454	0.399006	0.047925	0.0348778	0.0121647
Asap1	-0.571963	-0.480842	0.351487	0.418963	0.0994766	0.0226118	0.203484	0.0475907
Asb1	-0.527251	-0.0728198	-1.1757	-0.74466	0.116892	0.8349	9.26626e-06	0.000374382
Asb3	0.1792	0.610218	NA	0.339274	0.803773	0.120762	NA	0.38952
Asb6	-0.184403	0.334182	-0.620331	-0.124588	0.690264	0.268212	0.102121	0.639012
Asb8	-0.393977	0.232931	-0.75804	-0.154403	0.458533	0.612656	0.117663	0.691457
Ascc1	0.572827	-0.644083	0.937103	-0.304597	0.411319	0.105712	0.142927	0.450587
Ascc2	-0.585501	0.0349959	-0.536419	0.0607281	0.171755	0.929751	0.181838	0.855492
Ascc3	-0.975189	-0.319358	-0.176953	0.454963	0.00516458	0.24675	0.63821	0.063533
Asf1a	0.355838	-0.0859528	-0.358754	-0.823691	0.387425	0.824867	0.385796	0.000404216
Asf1b	0.852856	-0.0333589	0.265635	-0.643797	0.00357883	0.90654	0.352979	0.000172764
Ash2l	0.105447	-0.162105	0.203518	-0.0864397	0.865727	0.679392	0.720059	0.813985
Asl	-0.622942	0.708608	NA	-0.055796	0.402011	0.334951	NA	0.922746
Asna1	0.788152	-0.276224	1.05663	-0.0301296	0.0580873	0.344267	0.00291054	0.921766
Asns	0.292287	0.466909	0.190278	0.341532	0.298829	0.00119852	0.390118	0.0234204
Asph	1.65299	-0.236708	2.03307	0.123315	0.0375693	0.583674	0.00377815	0.765119
Aspm	-1.89027	-0.742168	-1.10698	0.0180914	1.18999e-14	5.11865e-05	1.2028e-10	0.945811
Aspscr1	-0.29582	0.132601	-0.430756	-0.0244134	0.556145	0.744451	0.343116	0.948229
Asun	-0.869659	0.127711	-0.0574485	0.916863	0.0464749	0.716038	0.924282	0.000354523
Asxl1	-1.51235	-0.390967	-1.11549	-0.0175486	2.43727e-06	0.177679	2.89349e-05	0.958308
Asxl2	-1.04081	-0.92773	-0.742372	-0.652263	0.0117458	0.00529386	0.0568634	0.0406051
Atad1	0.0198787	-0.0684774	0.523265	0.390442	0.966933	0.898215	0.465035	0.343849
Atad2	-0.7329	-0.471607	-0.0775769	0.1602	0.00919984	0.0115895	0.784686	0.44585
Atad2b	-0.944801	-0.998202	-0.0393185	-0.116071	0.00423868	5.91501e-06	0.924616	0.675446
Atad5	-1.17783	-0.605157	-0.334908	0.214596	0.000294754	0.0103991	0.257093	0.418169
Ate1	0.413053	0.53759	0.246359	0.348677	0.512375	0.17715	0.760666	0.301735
Atf1	1.02649	-0.144538	NA	-0.427782	0.123962	0.798541	NA	0.251602
Atf2	-0.127039	NA	NA	-0.442864	0.904393	NA	NA	0.450587
Atf4	-2.12869	-3.13393	-1.51354	-2.54278	8.36822e-18	2.53703e-49	3.04706e-19	3.74206e-29
Atf6	-0.42572	-0.0994682	-0.42484	-0.121653	0.30724	0.769466	0.253127	0.670038
Atf7ip	-0.676077	-0.414806	-0.126722	0.110961	0.0256207	0.0425701	0.662556	0.633789
Atg101	1.43422	0.00636894	NA	-0.48661	0.110035	0.996614	NA	0.291159
Atg12	-0.53668	-0.871588	-0.95133	-1.30884	0.242215	0.0208792	0.0201351	1.07186e-05
Atg13	-1.04531	1.12346	NA	0.0871679	0.0456854	0.0249255	NA	0.841716
Atg14	-0.575144	0.127082	NA	-0.954602	0.326769	0.839002	NA	0.00564091
Atg16l1	0.434997	-0.709893	0.628476	-0.537818	0.595302	0.101545	0.427701	0.194831
Atg2a	-1.2098	-0.39383	-0.464653	0.32765	0.000649554	0.171148	0.168489	0.235042
Atg2b	-0.759713	-0.913788	0.13466	-0.0423612	0.0650685	0.000475461	0.771596	0.906451
Atg3	0.852371	NA	NA	-0.799897	0.35632	NA	NA	0.11788
Atg4a	-1.35327	0.285798	-1.55489	0.0566238	0.00509064	0.520127	0.000376967	0.899667
Atg4b	0.422159	0.307757	0.0685744	-0.0681625	0.368784	0.358592	0.910079	0.828197
Atg4d	1.01489	0.266331	0.062356	-0.708691	0.0134928	0.459383	0.924616	0.00234232
Atg5	1.39999	NA	NA	-1.05499	0.241351	NA	NA	0.17536
Atg7	-0.542446	0.894686	NA	1.13633	0.45388	0.0189198	NA	0.00117452
Atg9a	-0.439442	-0.197467	-0.35267	-0.133776	0.289931	0.51977	0.350012	0.634229
Atic	-0.239222	0.554872	0.0600701	0.829682	0.599253	0.0355495	0.908319	0.000569768
Atl2	-0.182533	-0.0733358	-0.136589	-0.0507495	0.619566	0.785768	0.669088	0.835132
Atl3	0.101092	0.884383	0.0144325	0.78347	0.875311	0.00540125	0.979035	0.00425183
Atm	-1.36283	-0.239625	NA	0.386047	0.0132843	0.645681	NA	0.376957
Atox1	-0.311891	-0.501398	-0.864594	-1.07913	0.460099	0.151305	0.0158245	6.6356e-05
Atp11c	-0.310125	-0.0321173	0.513619	0.772166	0.72138	0.956777	0.493439	0.0360259
Atp13a1	0.138404	-0.240805	0.4269	0.0218492	0.861938	0.596376	0.54501	0.958887
Atp13a3	-0.067467	-0.239369	1.21837	1.03037	0.956999	0.573317	0.0399126	0.00580167
Atp1a1	-0.791968	-0.181152	0.363228	0.950598	0.014877	0.427075	0.163813	2.54698e-07
Atp1b2	0.170075	0.317311	0.650988	0.777029	0.777171	0.314829	0.126319	0.00459028
Atp1b3	0.756289	0.0704018	0.821889	0.114579	0.139583	0.859292	0.0772029	0.726273
Atp2a2	-0.751705	-0.298126	0.766688	1.19668	0.0209011	0.133117	0.000342314	1.68759e-11
Atp2b1	-0.446353	0.168112	0.186683	0.778781	0.447751	0.681242	0.760269	0.0120496
Atp2b4	-0.975798	-0.38366	-0.133216	0.435315	1.14922e-05	0.00830305	0.59059	0.000871837
Atp5a1	-0.223016	-0.129789	0.348029	0.417635	0.385221	0.410709	0.122408	0.000762062
Atp5b	0.112271	0.430597	0.214537	0.509441	0.681776	0.00257538	0.415518	2.71105e-05
Atp5c1	1.29917	1.70327	0.253409	0.63421	1.2323e-05	2.15535e-20	0.464716	0.000120091
Atp5d	1.05599	-0.130293	0.687618	-0.521585	7.39298e-05	0.563959	0.00113758	0.001052
Atp5e	1.04084	0.282854	-0.628631	-1.40977	6.67297e-05	0.244601	0.00849763	9.96942e-20
Atp5f1	0.519648	0.542001	0.320486	0.319621	0.0844751	0.00427925	0.199736	0.0704024
Atp5g1	0.894977	0.202452	0.611425	-0.103688	0.102237	0.674794	0.323401	0.798512
Atp5g3	1.01593	0.624585	-0.331834	-0.746273	4.17549e-05	0.000691877	0.143774	2.16736e-07
Atp5h	0.617173	0.601907	-0.0226569	-0.0609124	0.0414593	0.00428163	0.950037	0.789719
Atp5j	0.998017	-0.192918	-0.0530724	-1.2673	0.000436025	0.464104	0.899542	1.3956e-13
Atp5j2	0.356114	0.316338	-0.963572	-1.0271	0.232073	0.177809	5.91841e-06	1.1425e-10
Atp5k	-1.03769	-0.82142	-1.40238	-1.21005	0.000474157	0.00317301	2.76015e-09	4.70835e-08
Atp5o	1.5005	0.373512	0.810404	-0.339459	9.50786e-08	0.0726001	0.00117519	0.0538301
Atp6ap1	-0.110566	0.0376066	-0.0428661	0.0818285	0.776818	0.888516	0.906496	0.717244
Atp6ap2	0.421722	0.088127	0.593482	0.236952	0.322498	0.772829	0.0958374	0.32879
Atp6v0a1	-0.374143	-0.14263	-0.291465	-0.0832652	0.246633	0.551645	0.254222	0.71009
Atp6v0b	1.87981	1.4243	0.533133	0.0544547	0.000171724	6.80256e-06	0.494058	0.86852
Atp6v0c	1.30342	0.802111	NA	-0.464456	0.0232765	0.106784	NA	0.293606
Atp6v0d1	0.673774	0.688674	-0.0241227	-0.0326544	0.0282606	0.000493231	0.949893	0.889546
Atp6v0e	1.37806	2.39721	NA	0.0362555	0.0753015	2.73839e-05	NA	0.93531
Atp6v1a	-0.468403	-0.112512	0.386054	0.718183	0.269268	0.735506	0.289887	0.00412818
Atp6v1b2	-0.189789	-0.095734	-0.168712	-0.0975928	0.579578	0.698068	0.514425	0.656593
Atp6v1c1	1.1704	0.42771	0.848767	0.080708	0.0280689	0.256214	0.15451	0.828197
Atp6v1d	0.692435	-0.180852	0.389206	-0.507439	0.0661198	0.563959	0.302193	0.0234925
Atp6v1e1	-0.380593	-0.685806	-1.0042	-1.33276	0.163729	0.000190315	5.78583e-09	5.98154e-19
Atp6v1f	2.76396	1.80758	NA	-0.198622	0.0503159	0.0499217	NA	0.738894
Atp6v1g1	0.777738	NA	NA	-0.264415	0.378591	NA	NA	0.63849
Atp6v1h	0.812738	-0.48062	0.777639	-0.536566	0.125115	0.221129	0.120432	0.146176
Atp7b	-0.998449	-0.307859	0.039776	0.721539	0.119551	0.454122	0.949334	0.0451337
Atp8a1	-0.688138	-0.395674	-0.474084	-0.205107	0.026512	0.071925	0.0532326	0.362211
Atpaf2	1.58457	NA	NA	-0.961186	0.0410609	NA	NA	0.0225996
Atpif1	0.770456	-0.487214	-0.0775603	-1.35876	0.000392189	0.000453545	0.779396	1.33986e-31
Atr	-2.36581	0.523752	-1.65237	1.21242	1.44443e-05	0.305738	0.000958235	0.0139498
Atrx	-1.35235	-0.699174	-0.442018	0.187656	6.77859e-06	0.00154495	0.0771871	0.470214
Atxn10	0.701523	2.47639	NA	0.950646	0.451136	8.4304e-07	NA	0.0311879
Atxn2	-0.737643	-0.139624	-0.341258	0.233945	0.115376	0.716038	0.465427	0.47722
Atxn2l	-0.341967	-0.157962	-0.145952	0.0148786	0.345874	0.524817	0.662556	0.955325
Atxn3	0.357594	0.59666	NA	0.0160512	0.60914	0.163409	NA	0.973055
Atxn7l1	-0.498845	-0.5257	NA	-1.33124	0.361663	0.323811	NA	0.000107551
Atxn7l3b	0.607849	0.321776	NA	-0.380822	0.33703	0.524817	NA	0.308615
Auh	0.645806	0.507295	-0.319932	-0.482877	0.181796	0.138805	0.5772	0.0795808
Aup1	0.553003	-0.0984552	0.405791	-0.267958	0.197993	0.779586	0.336458	0.303012
Aurka	0.441293	-0.103996	0.143132	-0.425825	0.101125	0.604035	0.539564	0.00354469
Aurkaip1	1.15791	0.385921	0.544012	-0.250578	0.00209341	0.187709	0.180626	0.312647
Aurkb	0.31183	0.0252462	0.601726	0.291934	0.375297	0.927732	0.0150543	0.139857
Axin1	1.12398	-0.273397	NA	0.275739	0.348029	0.633903	NA	0.604272
Azi2	-0.100453	NA	NA	-0.905105	0.923725	NA	NA	0.146428
Azin1	-0.337356	0.183628	-0.0695962	0.427775	0.331254	0.443174	0.848469	0.0272762
B2m	0.509797	0.511684	-0.276189	-0.296198	0.187104	0.0854218	0.47936	0.341671
B4galt1	0.0933824	0.155065	0.224147	0.263019	0.860029	0.62645	0.618359	0.308745
Babam1	0.596878	0.202545	-0.2257	-0.641555	0.25445	0.660575	0.756322	0.0351585
Bach1	-0.436625	-0.887023	-0.842083	-1.31467	0.319775	0.0100951	0.0308938	1.13196e-06
Bad	0.222207	NA	NA	-1.29663	0.728691	NA	NA	0.00318854
Bag1	0.94099	0.492471	-0.273273	-0.743878	0.0153444	0.142425	0.585759	0.00157574
Bag2	0.745033	0.235948	0.171577	-0.359597	0.0777628	0.492658	0.753493	0.154955
Bag3	0.720039	-1.04149	NA	-1.29217	0.497117	0.0656304	NA	0.00236155
Bag5	0.529588	NA	NA	-0.0441789	0.662554	NA	NA	0.950325
Bag6	-0.795799	-0.284382	0.161632	0.649562	0.00516769	0.150562	0.516385	0.000207714
Bahd1	-0.477759	-0.516579	0.484497	0.424479	0.395617	0.147368	0.311825	0.225384
Banf1	0.820772	-0.26389	-0.296896	-1.40523	0.00930175	0.37722	0.388379	2.11891e-13
Banp	0.231352	-0.653986	0.603027	-0.301626	0.755028	0.0626257	0.282676	0.429176
Bap1	0.225743	-0.091578	-0.185728	-0.524581	0.714338	0.857314	0.800977	0.107197
Bard1	-0.574776	-0.242873	-0.389132	-0.0800446	0.113978	0.388301	0.229561	0.771303
Bax	1.05745	0.00757412	0.221768	-0.846234	0.0173047	0.989316	0.729247	0.000671749
Baz1a	-1.15793	-0.426942	-0.0385811	0.669662	7.20085e-05	0.0413841	0.910864	0.000975008
Baz1b	-1.23781	-0.731297	-0.165091	0.318071	6.57215e-07	4.4557e-06	0.462783	0.0747117
Baz2a	-1.8032	-1.16552	-0.653368	-0.0391849	2.96956e-11	3.65045e-09	0.00142214	0.892929
Baz2b	-1.26659	-0.477512	-0.894103	-0.127491	0.00866427	0.238844	0.0449595	0.769044
Bbip1	0.953551	NA	NA	-2.11309	0.385692	NA	NA	0.0439407
Bbs7	-0.991581	-0.319969	NA	-0.557882	0.0687911	0.565714	NA	0.158245
BC003331	0.904627	0.185589	NA	-0.00296138	0.235495	0.718761	NA	0.993705
BC003965	-0.0669444	NA	NA	-0.314639	0.953491	NA	NA	0.630174
BC004004	2.10948	NA	NA	-0.126566	0.0581526	NA	NA	0.829223
BC005624	0.491327	-0.819185	0.540746	-0.794492	0.38	0.0222043	0.309633	0.0161018
BC017158	0.696389	0.5316	0.213912	0.0230648	0.272085	0.168456	0.807226	0.948229
BC017643	-0.278293	NA	NA	-1.00054	0.72324	NA	NA	0.0238376
BC030867	1.2656	-1.17215	NA	-0.904321	0.05918	0.0100951	NA	0.00853088
BC031181	1.30368	0.777669	NA	-0.762488	0.0270389	0.163922	NA	0.0265121
BC052040	4.40266	1.54005	NA	0.426197	0.00242121	0.00317953	NA	0.306641
BC055324	0.183981	-0.391452	1.24111	0.646519	0.795692	0.310172	0.00730907	0.0706514
Bcap31	0.25275	-0.232545	0.224011	-0.284785	0.572861	0.440968	0.597394	0.261287
Bcas2	0.676108	0.180295	-0.101981	-0.620903	0.0161222	0.434499	0.744333	0.00012142
Bcas3	-0.664222	-0.0696611	-0.394113	0.177277	0.0745457	0.828347	0.243459	0.504912
Bcat2	-0.06021	0.215782	NA	0.421432	0.96339	0.688317	NA	0.371397
Bccip	-0.379973	-0.584249	-0.183371	-0.411778	0.333718	0.0420284	0.650263	0.124715
Bckdk	1.24472	-0.475865	1.17987	-0.565428	0.0693166	0.323714	0.152319	0.132982
Bcl10	1.38362	0.235804	NA	-0.259936	0.113034	0.682755	NA	0.537642
Bcl11a	-0.590404	-0.0483899	-0.0292498	0.490458	0.290171	0.912254	0.970742	0.150595
Bcl2l1	-0.836828	-0.260681	-1.52446	-0.972154	0.000891427	0.240802	2.81238e-18	1.89428e-09
Bcl2l13	0.391064	0.363406	-0.162832	-0.213204	0.302081	0.159611	0.690673	0.362246
Bcl7b	1.31758	NA	NA	-0.391464	0.278971	NA	NA	0.516717
Bclaf1	-0.866265	-0.474346	-0.411514	-0.0424516	0.00616339	0.0354435	0.127578	0.879938
Bcor	-1.14958	-0.943573	-0.00228202	0.181105	0.00800642	0.000718475	0.998973	0.620908
Bcorl1	-1.36826	-0.499328	-0.701119	0.144238	2.33194e-05	0.0630595	0.0131848	0.616255
Bdp1	-1.73785	-0.871061	-0.555435	0.287921	2.13429e-05	0.00810671	0.164084	0.456475
Becn1	0.133048	0.101393	-0.651533	-0.705671	0.795777	0.798966	0.126168	0.00410222
Bet1	-0.681354	NA	NA	-2.40942	0.376573	NA	NA	0.0441846
Bet1l	0.409053	NA	NA	-1.46452	0.645681	NA	NA	0.00481034
Bicd2	-0.222247	-0.81064	0.865854	0.257263	0.784189	0.0232439	0.101515	0.540226
Bin2	0.0779891	NA	NA	-0.760462	0.933793	NA	NA	0.264335
Bin3	-0.00456518	0.76279	-1.23286	-0.488633	0.994972	0.0242364	0.000776499	0.0575278
Birc5	0.740034	0.0800396	-0.287325	-0.970416	0.00376232	0.726706	0.193203	3.55254e-12
Birc6	-1.61589	-0.275855	-1.07811	0.238201	2.08289e-09	0.254725	5.88305e-08	0.300346
Blm	-0.915268	-0.272645	-0.281885	0.337116	0.000404008	0.153105	0.180781	0.0600301
Blmh	0.124608	-0.153291	0.369144	0.0671273	0.777171	0.573321	0.236762	0.802279
Bloc1s1	1.78135	0.162238	NA	-0.0758045	0.166615	0.82542	NA	0.909554
Bloc1s5	0.31962	NA	NA	-1.10748	0.663921	NA	NA	0.00583131
Blvra	0.54356	-0.303878	0.508221	-0.363191	0.204075	0.358592	0.217431	0.188547
Blvrb	0.326874	-0.135702	-0.162509	-0.648855	0.149248	0.397364	0.667583	3.0526e-08
Blzf1	-0.153568	NA	NA	0.222138	0.900762	NA	NA	0.726273
Bmp2k	-0.859731	-0.130926	-0.268513	0.436461	0.000748048	0.515947	0.200424	0.00735418
Bms1	-1.19164	-0.513396	-0.0761644	0.579603	0.000440918	0.0365643	0.848862	0.0197888
Bnip1	1.57903	NA	NA	-1.14045	0.137724	NA	NA	0.076886
Bnip2	-0.0638828	-0.462168	0.209772	-0.210321	0.922555	0.184841	0.706601	0.534723
Bnip3l	-0.238002	0.62713	-1.66019	-0.817879	0.577897	0.0608832	4.50191e-07	0.000543812
Bod1l	-1.93725	-1.25745	-0.812955	-0.155946	1.16321e-12	1.42653e-09	4.21824e-05	0.557835
Bola1	-0.463354	-0.137214	NA	-0.351355	0.497313	0.864377	NA	0.47722
Bola2	1.47276	0.122369	0.584227	-0.784504	0.0022479	0.796119	0.371421	0.0158313
Bola3	-0.345257	2.2268	-2.10584	0.443726	0.401772	6.13151e-14	2.19841e-09	0.0689328
Bop1	0.425176	-0.455201	0.639774	-0.263036	0.433395	0.230065	0.195782	0.450587
Bora	0.288514	-0.67514	0.654937	-0.329794	0.650137	0.0576104	0.210449	0.356417
Bpgm	-1.32009	-0.161592	-2.11373	-0.978964	9.17624e-11	0.31241	3.45069e-28	2.84381e-17
Bptf	-1.75435	-1.05409	-0.897395	-0.220925	4.89447e-07	0.000171295	0.00304271	0.50984
Braf	-0.794671	-0.300426	-0.033746	0.437379	0.106794	0.429776	0.958565	0.192355
Brap	-0.533919	-0.212921	-0.491673	-0.194123	0.239619	0.569464	0.249294	0.554592
Brca1	-1.34527	-0.454158	-0.714574	0.152757	3.10137e-07	0.022079	0.000192941	0.484565
Brca2	-1.95914	0.00320326	-1.09182	0.847497	8.65536e-13	0.994632	5.93435e-08	5.01845e-05
Brcc3	0.823767	0.567116	-0.205215	-0.485493	0.0539095	0.106601	0.730545	0.0769928
Brd1	-0.401275	-0.310197	0.248548	0.319059	0.596872	0.474286	0.745066	0.409007
Brd2	-0.307101	-1.21994	0.488849	-0.446096	0.546664	4.09277e-06	0.226116	0.124584
Brd4	-0.888094	-0.845696	0.148946	0.167728	0.00658241	3.20449e-05	0.638915	0.503911
Brd7	-0.182422	-0.396626	0.275315	0.0379643	0.652619	0.0947278	0.367951	0.895172
Brd8	-0.905635	-0.604303	-0.878222	-0.600759	0.000922272	0.00266095	7.56338e-06	0.000980832
Brd9	-0.193477	-0.480317	-0.468155	-0.777062	0.699375	0.161284	0.267765	0.00432862
Bre	0.0899478	0.0241956	0.0410024	-0.0438794	0.869312	0.952209	0.942798	0.902522
Brf1	0.943876	-0.435466	1.2474	-0.152472	0.124294	0.225997	0.0223996	0.673076
Brip1	-0.381332	0.525499	-0.730231	0.156147	0.4174	0.13468	0.0812587	0.689868
Brix1	-0.516467	-0.155785	0.00210027	0.340236	0.230884	0.68921	0.996339	0.329354
Brk1	0.736851	NA	NA	-1.58449	0.250596	NA	NA	3.48791e-05
Brms1	-0.634076	0.122946	NA	0.450562	0.350339	0.833752	NA	0.360247
Brms1l	0.0430134	0.417441	NA	-0.654774	0.949972	0.437224	NA	0.0703258
Brox	-0.34802	NA	NA	-0.0668997	0.733566	NA	NA	0.930466
Brpf1	-0.993522	-0.314675	-0.337719	0.318865	0.0741929	0.450343	0.567724	0.401677
Brpf3	-0.397914	-0.118652	-1.2021	-0.946699	0.159423	0.627521	2.31193e-11	2.11448e-09
Brwd3	-1.43119	-0.778787	-0.559332	0.0735562	0.00510784	0.0704365	0.290926	0.899654
Bsdc1	-0.938054	-0.260506	-1.23598	-0.581664	4.69099e-05	0.129141	1.10704e-13	2.49661e-05
Bsg	1.11371	0.468992	0.370007	-0.29788	1.97437e-07	0.000784676	0.0652964	0.0193934
Btaf1	-0.889947	-0.420595	0.14334	0.589033	0.00302656	0.0378363	0.606423	0.00286031
Btbd10	0.496531	NA	NA	-0.765625	0.602081	NA	NA	0.141103
Btf3	0.676784	1.1324	-0.312187	0.120766	0.0625112	3.72143e-06	0.438339	0.632988
Btg2	0.143489	0.233626	-0.665547	-0.598925	0.667176	0.258062	0.000883892	0.000137998
Btk	-0.719032	-1.20477	0.354816	-0.135026	0.220535	0.00320971	0.498897	0.784843
Btn1a1	-0.85192	0.609399	NA	0.0313042	0.155019	0.183376	NA	0.955325
Btnl10	0.309009	0.328148	0.132183	0.129004	0.505254	0.24296	0.798105	0.631876
Btrc	-1.487	-1.15708	-1.2303	-0.924115	5.25552e-10	2.94957e-11	2.82792e-13	6.35453e-08
Bub1	-0.453578	0.603331	-0.652643	0.381672	0.197383	0.0116834	0.0220407	0.0773782
Bub1b	-0.629487	-0.584864	-0.0648851	-0.0441267	0.0235356	0.0010011	0.816181	0.843248
Bub3	0.989907	-0.0851453	0.966696	-0.131353	0.00182416	0.741461	9.57455e-05	0.550134
Bud31	-0.235666	-0.570203	-0.782644	-1.14132	0.556145	0.046773	0.00680296	9.30843e-07
Bysl	-0.240732	0.053658	0.0163784	0.295292	0.700074	0.912861	0.978314	0.413314
Bzw1	0.375054	1.19963	-0.110425	0.691785	0.378098	1.83272e-06	0.83901	0.00152208
C1d	1.02948	-0.986796	0.674014	-1.36874	0.051199	0.0146905	0.25546	8.86332e-05
C1qbp	0.564405	0.527321	0.687138	0.627105	0.188323	0.0331877	0.0681271	0.0045193
C1qtnf4	-0.159511	NA	NA	-0.444766	0.830662	NA	NA	0.503805
C230052I12Rik	1.40886	0.780819	NA	-0.313533	0.173017	0.328847	NA	0.570566
C2cd2l	0.338919	0.315723	0.861622	0.815608	0.673462	0.450448	0.246647	0.0111938
C2cd3	-0.803511	-1.46915	-0.131484	-0.820091	0.0730518	2.12845e-06	0.806972	0.00991206
C2cd5	-0.506525	-0.164364	-0.145904	0.172725	0.173384	0.555323	0.702647	0.490318
C330018D20Rik	0.0525208	NA	NA	-0.251756	0.95583	NA	NA	0.675947
C330027C09Rik	-0.233586	0.230089	-0.0829134	0.356946	0.522694	0.337983	0.816181	0.0743428
C530008M17Rik	-1.12333	-0.752268	0.0362164	0.385236	0.0241634	0.0184303	0.946601	0.276607
Caap1	0.816386	1.07482	NA	0.229752	0.319494	0.0442355	NA	0.636475
Cab39	-0.215578	0.384729	NA	0.0639794	0.767769	0.41124	NA	0.890619
Cab39l	0.166186	1.39569	NA	0.187981	0.853595	0.0684023	NA	0.732741
Cabin1	-1.46034	-0.70099	-0.625033	0.111229	3.10132e-06	0.00204032	0.01594	0.68674
Cacna1g	-1.71082	-1.10762	-0.421525	0.158158	0.00063786	0.00237099	0.436257	0.703261
Cactin	-0.433846	-0.684458	-0.3676	-0.641285	0.300851	0.0232019	0.356247	0.0141468
Cacybp	0.788145	-0.203209	0.667876	-0.346203	0.0575325	0.546838	0.0970304	0.176402
Cad	-1.32877	-0.208354	-0.194766	0.902362	0.000164589	0.451515	0.606423	5.90796e-05
Calcoco1	-1.26065	-0.423696	-1.09618	-0.282747	4.21879e-05	0.0884503	6.38863e-06	0.236121
Calm1	0.930263	-0.162914	-0.18897	-1.3057	0.000392189	0.506113	0.476456	1.54744e-17
Calm2	0.189069	0.179227	-0.494984	-0.52848	0.620881	0.547106	0.109237	0.0100497
Calm3	0.866277	0.597042	-0.497525	-0.790302	0.00285987	0.00785608	0.0851573	2.82244e-06
Calr	-0.154422	0.402331	-0.315088	0.21814	0.59058	0.00603829	0.118041	0.123923
Calu	1.12477	0.827654	0.243676	-0.0761177	0.00472543	0.00257538	0.636179	0.784708
Camsap2	-1.29364	-0.761435	-0.319683	0.188891	0.000177972	0.00288546	0.327115	0.538976
Cand1	-0.413795	-0.0887384	0.590781	0.892976	0.275644	0.745852	0.0303123	8.06062e-06
Canx	0.123074	0.421532	0.265746	0.540172	0.701077	0.00672868	0.204729	9.88475e-05
Cap1	-0.177239	0.321163	-0.38393	0.0900744	0.744607	0.374587	0.422568	0.798902
Capn1	-0.187306	0.0581038	0.503981	0.725825	0.562493	0.784782	0.00840907	9.30843e-07
Capn15	-0.599402	-1.02982	-0.213924	-0.667151	0.332592	0.0123401	0.775841	0.0819019
Capn5	-0.327778	0.431091	-0.537738	0.19815	0.38565	0.0809405	0.0821616	0.402001
Capn7	-0.380681	0.533182	NA	0.523544	0.638503	0.227756	NA	0.154328
Capns1	0.263899	0.39209	0.150657	0.255575	0.404375	0.0354881	0.578782	0.138006
Caprin1	0.360315	0.278468	0.503666	0.398372	0.267606	0.158357	0.0265158	0.0213665
Capza1	1.20445	0.303091	NA	0.19184	0.121191	0.559584	NA	0.68006
Capza2	1.41264	-0.6884	1.20908	-0.91299	0.0136584	0.080771	0.0482489	0.00432851
Capzb	1.41429	-0.30292	1.94829	0.208378	0.000555233	0.242391	5.41476e-09	0.417467
Car1	-0.0895811	0.497458	-0.328744	0.236463	0.890353	0.0923422	0.510533	0.425657
Car2	-0.131316	0.158014	-0.590402	-0.324663	0.612925	0.4898	0.27021	0.0247879
Carhsp1	-0.707927	-1.54322	-1.08164	-1.9397	0.0762479	6.80256e-06	0.00253218	6.60838e-12
Carkd	-0.00780361	0.242844	NA	0.524183	0.99528	0.64462	NA	0.231206
Carm1	0.363519	0.259226	0.558545	0.43166	0.414838	0.368771	0.155134	0.0602603
Cars	-0.348012	-0.352124	-0.26217	-0.289557	0.333376	0.126468	0.360041	0.204856
Cars2	3.16497	NA	NA	-0.371943	0.0414593	NA	NA	0.519823
Casc3	0.0423317	-0.584923	0.01704	-0.633231	0.934062	0.0380026	0.975391	0.00787178
Casc5	-1.57652	0.143433	-1.04174	0.654569	2.29548e-11	0.484449	5.9063e-10	5.0129e-05
Caskin2	-1.17295	-0.710627	-0.697921	-0.258743	0.0063035	0.0423877	0.0983167	0.467245
Casp2	0.622573	0.0962523	0.830978	0.282644	0.226845	0.79477	0.0612425	0.333075
Casp3	-0.150796	1.21519	NA	0.79838	0.874317	0.00209317	NA	0.0139147
Casp6	-0.0288426	NA	NA	-1.13983	0.98525	NA	NA	0.10675
Casp7	0.965955	NA	NA	-0.644012	0.350883	NA	NA	0.318714
Casp8ap2	-0.371241	0.00841605	-0.392882	-0.0331412	0.435744	0.986418	0.382849	0.929953
Casp9	1.03054	0.504321	NA	-0.474851	0.180664	0.389904	NA	0.23517
Cast	-0.693878	-0.398284	-0.530942	-0.258946	0.0135243	0.0575289	0.00973131	0.213496
Cat	-0.587795	0.43743	-0.923313	0.0785781	0.00936917	0.00139384	4.60554e-07	0.605301
Cbfa2t3	-1.63997	-0.404411	-1.0844	0.127578	0.000790087	0.372304	0.016274	0.786426
Cbll1	-1.98659	NA	-1.44609	-1.06353	7.49853e-05	NA	0.00342303	0.0809568
Cbr1	0.82793	-0.210843	NA	-0.402317	0.304704	0.716038	NA	0.430688
Cbwd1	0.122495	-0.826113	0.182386	-0.793818	0.862655	0.0717616	0.808838	0.0553103
Cbx1	0.670715	0.145605	0.22135	-0.32921	0.238766	0.751979	0.765868	0.350136
Cbx3	0.832133	0.556898	0.341759	0.0405905	0.159832	0.171789	0.672745	0.921045
Cbx5	0.0797163	-0.111686	-0.0991673	-0.31418	0.823353	0.627372	0.71677	0.0761084
Ccar1	-1.24794	-0.63077	-0.346034	0.247658	1.2323e-05	0.0022555	0.14672	0.283953
Ccdc101	0.899648	NA	NA	-1.19304	0.203684	NA	NA	0.00255944
Ccdc104	0.795421	NA	NA	-0.0673734	0.434648	NA	NA	0.918029
Ccdc107	0.614975	0.658851	NA	-0.532448	0.379366	0.254431	NA	0.296105
Ccdc109b	1.19878	NA	NA	-0.854606	0.131377	NA	NA	0.100498
Ccdc117	0.42892	0.0507534	NA	0.451441	0.684676	0.920785	NA	0.340653
Ccdc12	0.963006	-0.775426	0.583767	-1.18101	0.0869768	0.0704126	0.38274	0.000857057
Ccdc124	-0.284185	-0.482544	-0.64591	-0.867516	0.459682	0.0992342	0.0364497	0.000100634
Ccdc127	0.480503	NA	NA	-0.391954	0.513843	NA	NA	0.385072
Ccdc167	0.429081	NA	NA	-1.47611	0.581468	NA	NA	0.000455617
Ccdc174	0.0130214	NA	NA	-1.47687	0.978269	NA	NA	0.00111344
Ccdc22	-0.0197949	0.0542383	0.0321339	0.0915781	0.977562	0.90654	0.952718	0.815888
Ccdc23	0.999056	0.164002	-1.14543	-2.0032	0.0064119	0.72244	0.00542449	2.05679e-19
Ccdc25	1.26596	-0.499274	0.418389	-1.37005	0.00141847	0.141657	0.379075	4.70095e-09
Ccdc32	0.227206	-0.10292	0.228826	-0.125243	0.769657	0.85206	0.805841	0.772681
Ccdc34	0.50733	-0.524353	-0.249474	-1.30377	0.214733	0.106902	0.592304	3.1391e-08
Ccdc47	-0.375936	-0.175632	-0.48774	-0.31067	0.374126	0.626218	0.201436	0.276185
Ccdc51	0.0351104	-1.28205	0.803525	-0.545294	0.955005	0.00903708	0.175567	0.298266
Ccdc53	1.66081	NA	NA	-0.701392	0.101125	NA	NA	0.244185
Ccdc55	-0.203527	-0.991173	-0.376618	-1.18526	0.703532	0.00889742	0.421949	0.000780234
Ccdc59	1.05615	NA	NA	-0.637052	0.0919359	NA	NA	0.187055
Ccdc6	-0.0657999	0.497046	NA	0.343904	0.959296	0.40234	NA	0.506028
Ccdc71l	-0.795367	0.947031	-0.584907	1.13491	0.072361	0.00112991	0.164084	9.88382e-06
Ccdc77	-0.326858	-0.443206	-0.460505	-0.600014	0.464444	0.139147	0.237382	0.0187136
Ccdc82	0.166476	-0.507156	0.181935	-0.515999	0.745788	0.109321	0.718642	0.06667
Ccdc88c	-0.860503	-0.308054	-0.932568	-0.402534	0.0397941	0.402673	0.0181339	0.149883
Ccdc9	-0.895052	-0.231918	-0.606586	0.029597	0.0988861	0.610108	0.251786	0.947937
Ccdc97	0.686084	-0.847795	0.207211	-1.34868	0.253957	0.0501255	0.80463	3.35158e-05
Cchcr1	0.577782	0.185389	0.168657	-0.245614	0.366873	0.692242	0.852312	0.504775
Ccna2	0.95535	0.409984	0.408683	-0.159813	2.75509e-05	0.00502134	0.0327578	0.267577
Ccnb1	-0.117811	0.236397	0.102501	0.433237	0.770616	0.325536	0.765874	0.0320991
Ccnb2	0.760311	0.201021	0.310902	-0.271895	0.0034541	0.274226	0.145256	0.0799359
Ccnc	0.756339	0.376823	NA	-0.390416	0.197528	0.425865	NA	0.266349
Ccnd3	1.06066	1.27341	0.865479	1.05488	6.788e-05	9.58246e-19	9.35202e-06	1.47171e-15
Ccndbp1	-0.606162	0.271622	-1.54241	-0.688254	0.0265515	0.2275	1.39115e-16	2.67245e-05
Ccne1	0.980918	-0.127239	0.573738	-0.557255	0.00528237	0.666146	0.0950952	0.00668645
Ccne2	0.191065	0.476974	-0.180769	0.0828779	0.595302	0.0247023	0.556945	0.733732
Ccnf	-0.293458	-0.0820675	0.217402	0.405268	0.324878	0.698068	0.320392	0.0129536
Ccng2	1.08522	-0.154359	NA	-0.534527	0.219098	0.798541	NA	0.213163
Ccnh	0.385516	-0.576341	1.20367	0.216461	0.632109	0.173212	0.058434	0.654764
Ccnk	-0.52584	0.5083	-0.569685	0.442378	0.342474	0.197384	0.292214	0.188713
Ccnl1	-0.105867	0.145995	-1.10736	-0.877797	0.873665	0.752284	0.0305544	0.00223167
Ccnl2	-0.130033	-0.810736	-0.888301	-1.59118	0.803603	0.0113582	0.0213274	1.53452e-10
Ccnt1	-0.408157	-0.524395	-0.331009	-0.472317	0.354222	0.0704164	0.424451	0.0921737
Ccnt2	0.13218	-0.159003	-0.494652	-0.807706	0.823167	0.713005	0.336809	0.00367369
Ccp110	-0.555611	-0.590371	-0.148223	-0.206194	0.154996	0.0288479	0.734794	0.450966
Ccpg1	-0.507334	-0.691644	-0.104224	-0.310789	0.432609	0.0819955	0.902854	0.445392
Ccrl2	-0.879964	-0.89384	-0.600187	-0.635104	0.115059	0.0221926	0.27021	0.0878567
Ccrn4l	0.128622	0.215202	0.135599	0.199084	0.741515	0.358758	0.666391	0.35467
Ccs	0.958447	-0.0343046	0.153933	-0.862239	0.0197647	0.93576	0.784635	0.000137733
Ccsap	0.770581	NA	NA	-1.02823	0.387099	NA	NA	0.0285419
Cct2	0.370359	0.369644	0.59576	0.571933	0.215565	0.0324857	0.00220558	0.000178438
Cct3	0.0807875	0.0482744	0.0922491	0.0364419	0.820162	0.83682	0.738175	0.861395
Cct4	0.368155	0.403111	0.690974	0.702514	0.268145	0.0343704	0.0018792	2.67245e-05
Cct5	0.392546	0.139392	0.347795	0.0710582	0.148323	0.446874	0.0798771	0.686637
Cct6a	0.379658	0.00613129	0.515655	0.119183	0.228012	0.985449	0.0217595	0.56656
Cct7	0.289565	0.108483	0.21395	0.00955378	0.307291	0.576207	0.321563	0.960739
Cct8	0.0367571	0.109773	0.393802	0.443154	0.915079	0.551612	0.0421486	0.00164031
Ccz1	0.128663	0.30361	0.508126	0.660751	0.826688	0.377007	0.305337	0.00746706
Cd164	1.49638	1.48693	NA	0.5438	0.0237489	8.97054e-05	NA	0.092588
Cd24a	0.469927	2.39644	-1.52238	0.382049	0.0651695	9.67693e-47	1.57014e-18	0.00575879
Cd2ap	0.102919	0.449667	0.234434	0.559141	0.890638	0.300851	0.772357	0.11823
Cd2bp2	-0.591705	-0.881796	-0.538346	-0.852277	0.163644	0.00664127	0.186698	0.00215011
Cd36	-1.58561	0.398062	-2.03696	-0.0762483	1.22574e-06	0.124608	1.41015e-13	0.773651
Cd47	1.03769	1.03165	-0.135813	-0.164792	3.70294e-05	9.1049e-12	0.611376	0.294441
Cd55	1.40535	-0.320526	1.12457	-0.624451	0.0217598	0.460149	0.0983167	0.0559276
Cd59a	-0.172271	-0.114033	-1.08799	-1.05263	0.650987	0.718367	1.262e-05	1.09186e-07
Cd59b	-1.15485	NA	NA	0.160259	0.158238	NA	NA	0.835716
Cd81	0.204471	0.161523	0.736209	0.674393	0.824566	0.730393	0.307738	0.0710651
Cd82	0.589003	0.277974	0.288945	-0.0452418	0.0279698	0.112713	0.180626	0.807701
Cd99l2	0.218139	0.184807	NA	-0.473162	0.774469	0.748585	NA	0.233438
Cdadc1	1.46686	NA	NA	-1.41612	0.221752	NA	NA	0.038367
Cdan1	-0.645144	-0.629448	0.120296	0.113111	0.127445	0.0181079	0.803611	0.712988
Cdc123	0.142584	0.30309	-0.5	-0.362558	0.729064	0.256158	0.110256	0.0905699
Cdc16	1.31942	-0.199369	1.26167	-0.278028	0.0135988	0.627521	0.0161612	0.398506
Cdc20	0.150512	-0.150809	0.390617	0.0663695	0.684731	0.517883	0.106534	0.771705
Cdc23	-0.09562	-0.194391	0.279611	0.157766	0.844153	0.490505	0.429345	0.547295
Cdc25a	0.176984	0.149382	-0.152913	-0.203101	0.753152	0.720724	0.806281	0.539965
Cdc25b	-0.511215	0.155802	-0.0911794	0.553057	0.0503159	0.380179	0.719699	8.07272e-05
Cdc25c	-0.0786683	0.0360876	0	0.0967476	0.904371	0.927942	0.998735	0.788046
Cdc27	0.138348	0.262208	0.341261	0.442667	0.781784	0.376251	0.397338	0.0673344
Cdc34	0.370446	0.967232	0.824828	1.39975	0.630356	0.00770245	0.268904	3.73518e-06
Cdc37	0.497114	0.0852681	0.590555	0.155494	0.163729	0.758731	0.0396695	0.497703
Cdc40	-0.306414	0.0221333	-0.232721	0.074371	0.521932	0.961178	0.630347	0.837924
Cdc42	0.577536	0.781884	0.0281374	0.209567	0.0922094	0.000446628	0.946427	0.345756
Cdc42bpa	-0.997545	-0.643523	-0.162228	0.167967	0.00641597	0.01468	0.685851	0.582479
Cdc42ep3	0.325989	-0.153635	0.669291	0.167283	0.571677	0.695769	0.147779	0.635433
Cdc42ep4	-0.533329	-0.0749529	-0.621764	-0.184517	0.313686	0.881109	0.208723	0.631908
Cdc45	-0.517061	-0.329157	-0.494504	-0.330409	0.100785	0.143544	0.039343	0.111889
Cdc5l	-0.582836	-0.345301	-0.245657	-0.0314949	0.104169	0.212559	0.465795	0.920634
Cdc6	-0.658692	-0.137811	-0.567881	-0.0704736	0.0232335	0.586829	0.00892904	0.769015
Cdc7	0.291708	-0.0394456	-0.375635	-0.728397	0.602958	0.939785	0.516108	0.0129464
Cdc73	0.28933	-0.423264	0.528728	-0.206108	0.59654	0.220175	0.255014	0.536009
Cdca2	-1.11422	-0.628146	-0.958895	-0.49622	0.000504664	0.0232439	0.000249085	0.0528275
Cdca3	1.16375	0.00685207	0.336243	-0.843517	2.06107e-05	0.984451	0.205718	1.09966e-07
Cdca4	0.908661	-0.229327	0.209852	-0.951195	0.0349202	0.53492	0.705747	7.08658e-05
Cdca5	0.534884	-0.392706	0.474149	-0.476158	0.197278	0.179089	0.234775	0.0446531
Cdca7	1.38099	NA	NA	-1.11341	0.197097	NA	NA	0.0592224
Cdca8	0.466224	-0.633776	0.223273	-0.900213	0.102707	0.000475364	0.339489	6.24713e-09
Cdipt	0.535838	0.0180891	NA	-0.66708	0.402869	0.971517	NA	0.0679692
Cdk1	0.279064	0.148324	0.500873	0.347208	0.315629	0.40234	0.00674138	0.0163072
Cdk11b	-0.243868	-0.96422	0.178922	-0.564219	0.602437	0.000386574	0.690545	0.0327202
Cdk12	-1.05246	-0.511305	-0.583698	-0.0661363	0.00100502	0.0315366	0.0294624	0.814273
Cdk13	-1.11163	-0.349638	-0.201386	0.537635	0.00827922	0.285208	0.675759	0.0760774
Cdk17	0.47695	0.394895	0.308802	0.205145	0.416332	0.280716	0.634187	0.541612
Cdk2	0.016408	0.514414	-0.424632	0.0505878	0.973476	0.0579727	0.281652	0.861318
Cdk2ap2	0.919952	0.926401	NA	-1.1581	0.0946282	0.120176	NA	0.00025595
Cdk4	1.52817	-0.164892	2.20314	0.493456	0.0219889	0.687661	5.25633e-05	0.129314
Cdk5rap1	-0.609159	-1.62927	-0.310151	-1.34842	0.342582	0.000380098	0.662518	0.00412712
Cdk5rap2	-1.20948	-0.518687	-0.804734	-0.136913	0.000229039	0.0522085	0.00350439	0.638522
Cdk5rap3	-0.575435	-0.877267	0.0732952	-0.251553	0.106796	0.000103739	0.856534	0.311237
Cdk7	0.594097	0.114498	0.190193	-0.308942	0.333718	0.818516	0.816181	0.441495
Cdk8	-0.292167	0.235025	NA	-0.117616	0.674946	0.64462	NA	0.788435
Cdk9	0.419968	0.308735	0.608025	0.475298	0.472273	0.410062	0.264378	0.108795
Cdkal1	1.21947	1.16014	NA	0.835471	0.193215	0.111459	NA	0.161531
Cdkl1	-0.790114	-0.559872	-1.17557	-0.972786	0.113233	0.239075	0.0122234	0.00740458
Cdkn1b	-0.162155	1.01637	-1.12781	0.0273877	0.69427	6.37261e-06	2.84616e-05	0.922628
Cdkn2aip	-0.269619	0.20522	-0.631127	-0.177978	0.619207	0.613018	0.175567	0.606858
Cdkn2aipnl	3.56814	1.88013	NA	0.132733	0.00222699	0.00151719	NA	0.770513
Cdkn2d	0.102049	0.0674174	-0.558785	-0.617022	0.787764	0.811821	0.0277342	0.000622045
Cdkn3	0.944141	0.00681345	0.24669	-0.712045	0.00274311	0.984516	0.478154	0.00013608
Cdr2	-0.348987	0.387134	-0.716321	-0.00364508	0.204459	0.0195656	4.88703e-05	0.984489
Cds2	1.47555	0.978318	NA	0.350841	0.100459	0.0435368	NA	0.459743
Cdt1	-0.57476	0.053879	-0.165343	0.43973	0.0494225	0.821653	0.511285	0.0114763
Cdyl	0.230553	-0.454443	0.452578	-0.253923	0.709186	0.234013	0.403405	0.475224
Cebpg	1.15365	NA	NA	-0.557438	0.297648	NA	NA	0.359858
Cebpz	-0.735273	-0.110562	-0.266011	0.333879	0.081524	0.773871	0.558476	0.298298
Cecr2	-0.975275	-0.736655	-0.0738617	0.141242	0.00432384	0.00169274	0.856704	0.617966
Celf1	0.190601	0.538326	-0.0761352	0.247939	0.581741	0.00516463	0.815452	0.174335
Cenpa	1.58395	0.0218253	0.0735006	-1.51098	6.29443e-05	0.961715	0.911326	4.51411e-11
Cenpb	-0.457526	-0.32535	0.31902	0.429521	0.463296	0.450804	0.613194	0.237764
Cenpc1	-1.09629	-0.0679741	-0.616812	0.388127	0.00155745	0.848675	0.0514037	0.135412
Cenpe	-1.37222	-0.513757	-0.878978	-0.0438365	5.56007e-10	0.00096934	3.60127e-07	0.822983
Cenpf	-1.33501	-0.778434	-0.892424	-0.358942	6.84632e-11	2.23428e-09	1.262e-05	0.00712756
Cenph	0.422928	0.0414214	-0.292251	-0.695533	0.270656	0.913623	0.453764	0.00469558
Cenpi	-0.156842	0.624005	0.0522568	0.811664	0.812431	0.0624008	0.937819	0.0043899
Cenpj	-0.609346	-0.88426	-0.363029	-0.659133	0.24677	0.0181331	0.484196	0.0769928
Cenpk	0.293421	0.661217	-0.304506	0.0406683	0.419936	0.00552521	0.343326	0.899654
Cenpl	0.321643	-0.754995	-0.0865944	-1.18513	0.513939	0.0293457	0.898124	1.07814e-05
Cenpm	1.47108	-0.335239	NA	-0.906946	0.0168311	0.522424	NA	0.00790229
Cenpn	0.747752	0.716636	NA	-0.398924	0.16363	0.0680058	NA	0.209753
Cenpp	1.12783	0.232898	0.568465	-0.346499	0.00698032	0.577897	0.216751	0.322242
Cenpq	-0.0195593	-0.147351	-1.08703	-1.23952	0.972472	0.727319	0.00237567	1.26732e-06
Cenpt	-0.0114627	-0.104641	-0.604472	-0.720159	0.985901	0.804925	0.165591	0.00478167
Cenpu	-0.30531	0.00781351	-0.929427	-0.634548	0.56787	0.995618	0.0451415	0.0705162
Cenpw	3.92899	NA	NA	-1.01435	0.000317917	NA	NA	0.0236381
Cep120	-0.296185	-0.090629	0.64803	0.831125	0.603509	0.804732	0.129998	0.00187934
Cep128	-0.345083	0.486788	-0.0949401	0.714461	0.597701	0.175083	0.899825	0.03309
Cep135	-0.709847	-0.246833	-0.366128	0.0727947	0.0761168	0.466148	0.356379	0.830539
Cep152	-1.58678	-0.906477	-0.684544	-0.0273929	4.03934e-05	0.00235143	0.0630807	0.947402
Cep162	-1.06918	-0.246801	-0.557517	0.242215	0.058921	0.62645	0.309819	0.641397
Cep170	-0.835885	-0.770349	0.194972	0.237709	0.0758982	0.0160489	0.703837	0.520912
Cep192	-1.36451	-0.404626	-0.554306	0.382093	2.22001e-05	0.114313	0.050552	0.11586
Cep250	-0.845715	-0.0902738	-0.479524	0.252007	0.0126181	0.760975	0.0937513	0.307377
Cep290	-1.83001	-0.197865	-1.11993	0.484902	1.93703e-06	0.640141	0.00176295	0.155847
Cep350	-1.36561	-0.258178	-1.24383	-0.159449	8.58937e-05	0.458715	4.395e-05	0.615671
Cep44	0.0408668	0.130621	NA	-0.147975	0.945355	0.806067	NA	0.733035
Cep57	0.0591862	-0.549181	-0.00741027	-0.637585	0.910942	0.0683365	0.994688	0.0130878
Cep57l1	-0.660835	0.156102	NA	-0.154358	0.271305	0.804238	NA	0.770929
Cep63	0.91056	NA	NA	-0.275485	0.371348	NA	NA	0.622754
Cep70	0.518787	0.296474	-0.333772	-0.580529	0.250371	0.430899	0.510186	0.0320524
Cep72	0.246702	-0.050081	NA	-0.226239	0.791756	0.943252	NA	0.637349
Cep76	0.0770515	0.176281	0.22471	0.300124	0.824566	0.344811	0.303201	0.055046
Cep85	-0.225177	-0.425999	0.0574145	-0.166375	0.656654	0.169345	0.920364	0.587792
Cep89	-0.267932	-0.793652	0.4458	-0.102132	0.649221	0.0121485	0.344775	0.787445
Cep95	-0.809912	-0.325599	-0.243857	0.212627	0.117	0.411806	0.663941	0.595097
Cept1	-0.653647	0.89614	NA	0.80441	0.364288	0.0508843	NA	0.067879
Cercam	0.0211396	0.299245	0.467667	0.723262	0.96206	0.156906	0.0832729	7.78063e-05
Cers2	1.47427	0.488106	0.502799	-0.505451	0.00189417	0.183918	0.408154	0.0714895
Ces2g	-1.0024	-0.52247	-0.778012	-0.320863	0.021577	0.103915	0.0536307	0.303847
Cetn2	-0.00881427	-0.207985	NA	-0.982375	0.994212	0.738679	NA	0.0117022
Cetn3	0.54963	-0.186169	-0.396258	-1.15449	0.0651695	0.526264	0.118883	1.23326e-07
Cfdp1	1.57394	-0.611224	1.17956	-1.02862	0.00265169	0.11656	0.039644	0.000634997
Cfl1	1.31136	1.23398	0.199978	0.0996647	1.51033e-06	5.76855e-12	0.515771	0.609728
Cggbp1	1.33676	0.925735	NA	0.0898999	0.116084	0.0817889	NA	0.850236
Cgrrf1	1.62861	-0.522384	NA	-0.888782	0.0481269	0.392637	NA	0.0280686
Chac2	-0.273184	0.202103	-0.844506	-0.392503	0.392054	0.394015	2.96877e-05	0.0375028
Chaf1a	-0.620189	-0.247679	0.103583	0.452881	0.0754812	0.31013	0.777257	0.0347945
Chaf1b	0.0889356	0.15599	0.681342	0.726173	0.863059	0.593334	0.0464703	0.000845047
Champ1	0.537759	-1.17151	1.80899	0.0817229	0.605841	0.0029611	0.00637178	0.892688
Chchd1	0.571457	0.28152	-0.566887	-0.876812	0.16222	0.524707	0.192421	0.00634274
Chchd10	1.01941	0.253821	-0.0495703	-0.836972	0.0134142	0.526627	0.941628	0.000737713
Chchd3	1.04111	-0.303867	1.28665	-0.0805057	0.0154305	0.329336	0.000540803	0.794767
Chchd7	1.36839	NA	NA	-3.25788	0.040572	NA	NA	4.7978e-14
Chd1	-1.00683	-0.738587	-0.191814	0.053394	0.00616165	0.00501645	0.628798	0.876881
Chd1l	-0.293402	0.0822115	0.00901439	0.377784	0.682771	0.861811	0.991814	0.308793
Chd2	-1.26948	-0.999618	-1.01132	-0.76505	0.000101171	2.68609e-05	6.98165e-05	0.00137167
Chd4	-1.16162	-0.581701	-0.0279424	0.527926	4.46173e-06	0.000372618	0.924616	0.00159445
Chd7	-2.094	-0.940803	-0.907725	0.222098	3.45867e-15	2.60227e-06	1.39276e-06	0.360616
Chd8	-1.33164	-0.453919	-0.580092	0.273901	2.08384e-05	0.0704164	0.0307474	0.282219
Chek1	-0.446418	0.26976	-0.19913	0.494503	0.326034	0.415022	0.681649	0.0945794
Chek2	0.0236243	-0.17982	0.0276339	-0.198669	0.96206	0.559584	0.950953	0.450587
Cherp	-0.573887	-0.12152	-0.06395	0.365161	0.190893	0.731556	0.911326	0.177366
Chfr	-0.097578	0.678036	NA	0.325792	0.925495	0.163015	NA	0.447437
Chic2	0.403171	NA	NA	-1.99678	0.690424	NA	NA	0.00871842
Chid1	2.06986	-0.00402337	NA	-0.374966	0.0467976	0.999591	NA	0.445366
Chm	-0.226637	NA	NA	-0.0269385	0.795287	NA	NA	0.96621
Chmp1a	0.251344	1.23931	NA	-0.137281	0.711252	0.0123401	NA	0.732554
Chmp1b	0.39937	-0.529711	-0.318341	-1.26982	0.386851	0.133176	0.515771	8.41594e-07
Chmp2a	0.765298	0.349508	-0.374694	-0.813881	0.0127463	0.167508	0.224988	9.3792e-06
Chmp3	0.111226	-0.0723567	NA	-1.0609	0.86132	0.90654	NA	0.000613633
Chmp4b	0.0529027	0.571486	-0.995854	-0.50061	0.904371	0.0284268	0.000422248	0.0141863
Chmp5	-0.578428	-0.261679	-0.916258	-0.623564	0.106149	0.414841	0.00180912	0.00884689
Chordc1	0.0731881	0.160653	-0.477136	-0.412867	0.883937	0.636793	0.237382	0.0767794
Chp1	-0.0706103	0.866416	-0.94213	-0.0278965	0.890638	0.00235143	0.00897641	0.929804
Chrac1	0.71237	0.014433	NA	-0.313738	0.307291	0.990779	NA	0.484885
Chst11	0.358886	0.308696	NA	0.0944638	0.63997	0.522385	NA	0.830539
Chsy1	-0.532059	-0.519553	0.698338	0.691868	0.521937	0.206628	0.260362	0.110778
Chtf18	0.289809	-0.801085	0.949796	-0.163887	0.552595	0.00164157	0.00666759	0.570297
Chtf8	1.02681	NA	NA	-0.839272	0.224983	NA	NA	0.103484
Chtop	-0.236382	-0.289995	-0.278666	-0.354668	0.71148	0.524423	0.663941	0.337132
Chuk	-0.612203	-0.347996	-0.142949	0.0984727	0.30627	0.423168	0.846908	0.82
Churc1	1.81543	0.583787	NA	-1.10745	9.60823e-05	0.150062	NA	0.000137998
Ciao1	-0.707568	-0.51797	-0.158205	0.00737378	0.0374311	0.0324857	0.650408	0.982645
Ciapin1	0.435256	0.191759	-0.140881	-0.40707	0.333718	0.608298	0.806362	0.116832
Cib1	0.717664	0.667256	-0.508301	-0.582377	0.041568	0.0176998	0.180487	0.00723233
Cic	-1.24639	-1.48664	-0.0929429	-0.356066	0.0036671	9.7814e-07	0.87271	0.325904
Cinp	-0.327836	-0.529182	-0.697412	-0.924096	0.454563	0.150702	0.0671312	0.00242853
Cipc	0.827823	NA	NA	-1.61066	0.460523	NA	NA	0.0773735
Cir1	-1.32554	NA	-2.6829	-0.592905	0.00886143	NA	1.00786e-06	0.289334
Cirbp	0.49272	NA	NA	-1.43503	0.611418	NA	NA	0.00279635
Cirh1a	0.702497	0.891312	NA	0.909623	0.376973	0.0280709	NA	0.0187589
Cisd1	1.08688	-0.242899	0.0965057	-1.25829	0.0181921	0.619262	0.899542	0.00010355
Cisd2	0.948945	1.46292	-0.310142	0.181862	0.0542929	6.90474e-06	0.670842	0.550637
Cish	-0.486002	0.241473	-1.82312	-1.11898	0.240631	0.589709	1.00248e-07	0.000121212
Cit	-1.13692	-0.780283	-0.789866	-0.456639	3.46119e-07	9.27902e-08	5.9765e-06	0.00167834
Cited2	-0.813367	0.571058	-1.03381	0.322858	0.146417	0.155067	0.037101	0.413314
Cited4	0.173768	-0.200009	0.0853779	-0.311655	0.620023	0.394033	0.776716	0.133685
Ciz1	-1.11254	-1.00045	-0.167837	-0.0774777	0.028341	0.00357653	0.784635	0.857783
Ckap2	0.053869	-0.542963	0.114502	-0.505973	0.899942	0.0133545	0.737253	0.0118577
Ckap2l	-0.207327	-0.205701	-0.23117	-0.253342	0.580081	0.418422	0.431416	0.251676
Ckap5	-1.19804	-0.414781	-0.205553	0.553769	2.18842e-07	0.00693629	0.338755	0.000148621
Cks1b	0.748722	0.883772	NA	-0.572795	0.124532	0.0248678	NA	0.0484414
Cks2	2.28203	1.32965	NA	-0.281091	6.40257e-05	0.000721373	NA	0.393665
Clasp1	-0.910315	-0.962461	0.393918	0.317829	0.0258935	0.000138071	0.283454	0.287479
Clasp2	-1.13922	-0.386439	0.62424	1.35325	0.00493265	0.151607	0.062697	6.65211e-08
Clcc1	0.575172	-0.310836	0.467202	-0.444995	0.328843	0.457596	0.436708	0.234533
Clcn2	0.336885	-0.389477	0.602831	-0.13839	0.740689	0.357444	0.428688	0.778123
Clcn3	-0.742896	-0.404978	-0.445049	-0.130204	0.0125964	0.0524909	0.0553428	0.569201
Clcn4-2	-0.218915	0.918495	NA	0.191141	0.740711	0.0177126	NA	0.601842
Clcn7	0.508194	-1.22856	1.04791	-0.708948	0.562493	0.00234089	0.173956	0.082434
Cldn13	-0.527277	-0.364989	-0.671418	-0.532935	0.0294801	0.0195541	0.000149288	7.80226e-05
Cldn25	1.14433	0.65731	0.868283	0.355776	0.056813	0.0741037	0.205834	0.305238
Clhc1	0.0991403	-0.533336	0.514587	-0.142793	0.875311	0.148845	0.345277	0.71342
Clic1	0.193463	-0.76767	-0.148314	-1.133	0.585208	0.000427345	0.628798	7.17498e-10
Clic4	0.58966	0.310711	0.0663567	-0.236249	0.0296968	0.100122	0.812097	0.186555
Clint1	-0.497536	-0.153939	-0.172848	0.147672	0.100303	0.515053	0.503767	0.497703
Clip1	-1.06698	0.142117	-0.0954773	1.09492	0.098378	0.811821	0.915126	0.0140564
Clk1	-1.2846	-1.55922	-0.913138	-1.21113	5.00499e-05	3.15414e-13	0.000185544	2.45772e-08
Clk2	1.41275	-0.827732	2.12299	-0.127866	0.0960851	0.0169613	0.000813706	0.760173
Clk3	-0.964751	-0.697468	-1.15413	-0.910233	2.80241e-05	8.71812e-06	4.58174e-12	6.97427e-11
Clk4	-0.853727	-0.910374	-1.29363	-1.37307	0.0359006	0.00616514	0.000245962	6.31616e-07
Cln5	0.349083	0.427955	NA	-0.370158	0.524606	0.302992	NA	0.243847
Cln8	-0.0520181	0.00673059	-0.930728	-0.890362	0.923735	0.984516	0.0199369	0.000580008
Clns1a	0.669781	-0.337423	0.934672	-0.0937474	0.307782	0.445496	0.131124	0.828197
Clp1	-0.948222	-0.098799	-0.55069	0.275171	0.0006769	0.703605	0.0108318	0.188524
Clpb	0.273465	0.184409	0.823031	0.713828	0.745477	0.695769	0.260362	0.0470798
Clpp	0.60796	0.13496	0.524828	0.0327259	0.284663	0.779586	0.369439	0.950325
Clptm1	1.23823	0.399405	1.33305	0.472273	0.00218314	0.114313	0.000189661	0.0300781
Clptm1l	1.1324	0.202032	1.28016	0.327716	0.0960793	0.645681	0.0626029	0.361987
Clpx	0.633635	-0.173279	1.13821	0.310232	0.24307	0.631358	0.00932635	0.301196
Clspn	-0.968297	-0.924698	-0.334058	-0.313439	0.000195685	5.26134e-08	0.107611	0.0975692
Clta	0.744133	0.0826498	0.503457	-0.181114	0.0231438	0.769466	0.0922586	0.409897
Cltb	0.981234	-0.0944917	0.512723	-0.585054	0.00552912	0.769306	0.161408	0.00458854
Cltc	-1.26965	-0.218672	-0.0691103	0.958734	2.33373e-10	0.124913	0.860585	5.23113e-17
Cluh	-0.931124	-0.160792	0.380109	1.12812	0.0960831	0.689217	0.460487	0.000243597
Clybl	0.317158	0.114045	-0.273292	-0.49716	0.496136	0.785088	0.576282	0.112192
Cmas	-0.401004	0.32005	-1.13006	-0.432225	0.0950195	0.028094	1.19888e-10	0.000572194
Cmc1	1.65694	NA	NA	-1.98914	0.110097	NA	NA	0.0147278
Cmc2	0.350728	0.984435	NA	-1.07746	0.575359	0.173212	NA	0.00201773
Cmip	-0.331877	-0.141347	0.534064	0.702963	0.553819	0.693703	0.223542	0.0098151
Cmpk1	0.135332	0.0211617	-0.268393	-0.402007	0.793947	0.958795	0.590271	0.172803
Cmpk2	-0.720292	0.328241	-0.946904	0.0794569	0.0921105	0.417901	0.0240784	0.81796
Cmss1	-0.506963	NA	NA	-0.736164	0.491286	NA	NA	0.260866
Cmtr1	-0.431036	-0.349808	0.0352436	0.0933305	0.226166	0.138627	0.929535	0.714728
Cnbp	0.217258	0.0398233	-0.273393	-0.474401	0.451136	0.85366	0.186698	0.000780234
Cndp2	0.0169934	0.0754926	0.190067	0.214978	0.971707	0.893396	0.816181	0.637349
Cnep1r1	1.78745	NA	NA	-1.32679	0.0116177	NA	NA	0.000293288
Cnih1	1.17162	1.00936	0.584686	0.397453	0.0330067	0.00277849	0.408154	0.173052
Cnih4	0.590831	1.66187	NA	0.693116	0.390292	8.41471e-06	NA	0.0385013
Cnot1	-1.22368	-0.431008	-0.268721	0.500103	0.00014379	0.0744222	0.379075	0.0296214
Cnot10	0.472006	0.294501	0.369009	0.16903	0.345874	0.40234	0.464108	0.583385
Cnot11	0.840654	1.02157	0.78189	0.93556	0.188323	0.00310465	0.278766	0.00136647
Cnot2	-0.407622	0.0866924	-0.423966	0.0475936	0.315846	0.798966	0.246658	0.877852
Cnot3	-0.0550266	-0.356271	0.107098	-0.216337	0.94092	0.368537	0.874691	0.552962
Cnot4	0.613163	-0.0939247	0.498802	-0.231448	0.346989	0.86004	0.496135	0.552249
Cnot6	1.16377	0.0897816	1.70643	0.612513	0.187504	0.857058	0.0352188	0.0990648
Cnot8	0.42124	0.500144	NA	-0.330462	0.504485	0.251618	NA	0.345596
Cnppd1	0.023839	0.238706	-0.294517	-0.101761	0.963001	0.436641	0.49737	0.71773
Cnpy2	1.71185	NA	NA	-1.09601	0.0852885	NA	NA	0.015824
Cnpy4	0.025546	-0.583784	NA	-0.290433	0.961954	0.271274	NA	0.5794
Cnst	-0.25548	-0.670816	0.256881	-0.181854	0.584016	0.0116197	0.520725	0.535104
Cntn3	0.120107	0.0240732	NA	0.0180446	0.91466	0.97313	NA	0.975561
Cntrl	-1.30283	-0.980645	-0.724713	-0.425437	0.000666662	0.00106157	0.0429866	0.183375
Cntrob	-0.472151	-0.818084	NA	-0.430384	0.589316	0.0917901	NA	0.425473
Coa3	0.31903	-0.0597568	NA	-0.914841	0.602689	0.934055	NA	0.00550809
Cog1	-0.398337	-0.594297	0.362138	0.143505	0.385692	0.0336749	0.378996	0.642474
Cog2	0.172288	0.589476	0.194739	0.587694	0.788481	0.103569	0.778474	0.0612149
Cog4	0.295633	0.377372	-0.143618	-0.0849235	0.572861	0.287993	0.818986	0.795657
Cog6	0.601028	0.346582	NA	0.113087	0.569774	0.574856	NA	0.842947
Cog7	-0.523759	-0.0635946	0.232427	0.665997	0.401803	0.896774	0.719214	0.0599654
Cog8	0.0711518	0.176155	0.0832636	0.163492	0.910942	0.661727	0.905008	0.649952
Col4a3bp	0.402436	0.0289635	0.113319	-0.282886	0.484732	0.950215	0.880348	0.401411
Commd1	1.37176	0.0372911	0.613155	-0.741647	0.000208821	0.919437	0.13679	0.00162808
Commd10	0.267934	NA	NA	-0.431807	0.762204	NA	NA	0.4502
Commd2	1.32921	1.35509	NA	0.184463	0.0710523	0.0065659	NA	0.736362
Commd3	1.61825	-0.199118	1.26776	-0.580802	0.0089341	0.701832	0.110639	0.135599
Commd4	-0.126898	0.265467	NA	-1.00835	0.854928	0.626955	NA	0.00441744
Commd5	0.61395	NA	NA	-0.725887	0.431601	NA	NA	0.15727
Commd6	2.00884	NA	NA	-0.509507	0.0344202	NA	NA	0.301665
Commd8	0.66426	0.42342	-0.210227	-0.474482	0.203064	0.30896	0.777257	0.141312
Comt	1.17111	-0.133319	0.68289	-0.644941	0.00064969	0.645757	0.0424292	0.00127435
Copa	-1.21798	-0.149846	-0.505555	0.539347	9.82555e-05	0.58534	0.0583485	0.0141238
Copb1	0.107139	0.772234	0.301488	0.943327	0.838374	0.00235386	0.478141	6.94627e-05
Copb2	-0.195402	-0.0540948	-0.0229417	0.0949007	0.554957	0.821653	0.941628	0.642116
Cope	0.296145	0.0437046	-0.113029	-0.388521	0.404116	0.886867	0.766924	0.0547649
Copg1	-0.443294	-0.222125	0.271433	0.469778	0.22744	0.374585	0.373183	0.0281694
Copg2	-0.0314721	0.0116282	0.744176	0.766418	0.966683	0.984516	0.092885	0.00785314
Cops2	-0.438195	0.442912	-0.833659	0.0238593	0.144303	0.0320318	4.01104e-05	0.921669
Cops3	0.792689	0.224357	0.836368	0.245901	0.0315612	0.397965	0.00706474	0.315275
Cops4	1.09162	0.396438	0.921216	0.202577	0.00592058	0.154229	0.0138766	0.450587
Cops5	0.25065	-0.150671	0.247309	-0.177114	0.531494	0.6055	0.480228	0.46667
Cops6	1.03448	0.364433	0.378166	-0.314779	0.00184475	0.15435	0.294218	0.136366
Cops7a	2.90784	NA	NA	-0.422679	0.0268111	NA	NA	0.506679
Cops8	1.50213	0.871501	NA	-0.470947	0.0117553	0.0479727	NA	0.158455
Copz1	-0.176557	0.863052	-1.43405	-0.418307	0.583195	5.96249e-06	2.11416e-14	0.0116551
Coq10b	0.437934	0.801739	-0.14919	0.18997	0.372868	0.0133729	0.815341	0.584859
Coq5	1.63095	0.408262	1.23371	-0.0122068	0.00761073	0.301225	0.0875077	0.97502
Coq6	0.871065	-0.215002	1.31831	0.206118	0.185008	0.633238	0.0369851	0.611809
Coq7	0.757948	0.277048	NA	0.278782	0.503365	0.69173	NA	0.643921
Coq9	-0.171265	0.429433	-0.54196	0.0330572	0.789249	0.288777	0.323186	0.941228
Coro1b	0.184745	0.301786	0.202384	0.296638	0.744617	0.389545	0.719941	0.315486
Coro1c	0.183822	0.152967	0.500551	0.447661	0.729666	0.67093	0.253226	0.0939937
Cox11	0.682962	0.393843	NA	0.0683296	0.295358	0.374149	NA	0.871759
Cox15	0.914526	0.426596	NA	-0.0617239	0.243223	0.426916	NA	0.899654
Cox16	2.68365	NA	NA	-0.93439	0.00450017	NA	NA	0.100304
Cox17	0.510602	-0.524538	-0.764075	-1.82309	0.0799486	0.023299	0.000740375	3.26895e-28
Cox19	0.0979334	-0.403486	-0.505744	-1.03147	0.866665	0.391412	0.340078	0.00129869
Cox20	1.03987	0.0997096	NA	-0.966927	0.0426292	0.848219	NA	0.00512625
Cox4i1	0.763711	0.564214	0.0281103	-0.194523	0.00186119	0.000251846	0.924616	0.193902
Cox5a	1.35068	0.460236	1.07835	0.16484	0.000266008	0.0874847	0.0024254	0.541612
Cox5b	0.759566	1.1631	-0.284147	0.096114	0.0134928	2.22034e-08	0.384261	0.678694
Cox6a1	0.347566	0.282043	0.0194797	-0.0693751	0.229442	0.13208	0.946427	0.717244
Cox6b1	-0.27086	-0.244562	-0.561439	-0.558559	0.364288	0.256769	0.0040969	0.000934885
Cox6b2	-0.251835	-0.78284	-1.09398	-1.64875	0.487604	0.00237485	1.05918e-05	1.23096e-16
Cox6c	-0.108151	1.46811	NA	0.0126284	0.892905	0.00592749	NA	0.975484
Cox7a2	-0.778385	-0.270193	-1.03414	-0.54973	0.00192674	0.191212	2.05195e-09	0.000945216
Cox7b	0.766001	0.564093	-0.0486428	-0.273793	0.0352369	0.03576	0.928281	0.242117
Cox7c	-0.0411521	NA	NA	0.0276671	0.977562	NA	NA	0.973299
Cox8a	0.0204554	0.996789	-0.506928	0.446461	0.964139	2.17875e-05	0.133816	0.0350907
Cpd	-0.904345	0.498113	0.189934	1.56971	0.050484	0.0693513	0.698754	1.15697e-10
Cpeb4	-0.859448	0.0208667	0.0271708	0.884246	0.00276469	0.932161	0.931135	5.66479e-08
Cpne1	0.457779	0.479359	0.159995	0.15869	0.35632	0.1302	0.784686	0.601722
Cpox	-0.126848	0.0126285	0.0796535	0.195742	0.619061	0.964373	0.872928	0.168223
Cpsf1	-1.04875	-0.595786	0.0263425	0.456101	0.00646789	0.0262005	0.95451	0.0937292
Cpsf2	-0.011586	0.00761604	0.405109	0.402413	0.981156	0.98419	0.175567	0.0576869
Cpsf3	-0.600281	-0.774653	-0.137801	-0.337458	0.152693	0.00929492	0.783691	0.268575
Cpsf3l	0.287607	-0.132825	0.886516	0.442959	0.587549	0.701998	0.01986	0.11909
Cpsf6	0.318934	0.230581	0.798785	0.687175	0.470605	0.38582	0.0141952	0.00127435
Cpsf7	-0.805574	-0.337865	-0.225956	0.218852	0.265615	0.458771	0.790375	0.632109
Cpt1a	-0.421514	-0.52371	NA	0.270566	0.663167	0.297078	NA	0.546631
Cpt2	-0.280002	-0.30599	0.535676	0.484538	0.630094	0.397364	0.246647	0.128783
Cr1l	-0.481077	0.0129965	-0.689943	-0.215398	0.247592	0.975508	0.062519	0.47569
Cramp1l	-0.74656	-0.464023	-0.47032	-0.21055	0.073438	0.128113	0.238539	0.494397
Crat	-0.625694	0.45113	-0.823012	0.231383	0.16484	0.197384	0.0495212	0.456197
Crbn	0.1714	-0.292512	-0.0840271	-0.571983	0.748652	0.418422	0.898124	0.0466577
Crcp	1.03244	-0.371109	0.436511	-0.990986	0.0730518	0.411806	0.573038	0.00118047
Creb1	1.02253	0.480774	1.10738	0.544446	0.241351	0.259079	0.210338	0.153782
Crebbp	-1.28699	-0.924404	-0.117222	0.220873	9.18637e-05	4.61319e-05	0.744333	0.428377
Creg1	0.444369	0.633281	-0.50276	-0.337213	0.088742	2.58568e-05	0.00708865	0.0148169
Creld2	0.512044	0.112335	NA	-0.274799	0.472467	0.848675	NA	0.535469
Crip2	1.66822	-0.30104	1.85369	-0.149356	0.0131946	0.533569	0.0263911	0.727181
Cript	0.653935	0.837181	-0.919182	-0.759598	0.113526	0.0163898	0.0322989	0.00286329
Crkl	0.216461	-0.224771	-0.138336	-0.602068	0.706854	0.607116	0.839199	0.054061
Crlf3	0.188855	0.194207	0.0049463	-0.0129413	0.554957	0.300474	0.988776	0.950545
Crnkl1	-0.576645	0.0540404	-0.294722	0.313667	0.0855668	0.857058	0.323519	0.167855
Crtc1	0.527419	NA	NA	-1.36053	0.619566	NA	NA	0.0698053
Cryzl1	0.656144	0.252793	0.228778	-0.198435	0.250086	0.565845	0.763104	0.590286
Cs	0.352147	0.405603	0.652717	0.682233	0.223818	0.0108466	0.000381785	1.09432e-06
Csde1	-0.231507	-0.0992211	0.670687	0.779883	0.589316	0.720259	0.0161612	0.000172764
Cse1l	-0.41534	0.467283	0.292507	1.15181	0.234647	0.0213628	0.281874	2.26885e-10
Csnk1a1	0.465565	0.767194	0.045331	0.323715	0.209599	0.000386574	0.924282	0.121879
Csnk1d	0.466808	0.655799	-0.6809	-0.51391	0.337814	0.0540009	0.176107	0.0488797
Csnk2a1	0.877958	0.837949	NA	0.0140945	0.253957	0.104277	NA	0.975004
Csnk2a2	-0.491188	0.559007	NA	0.678792	0.505604	0.206628	NA	0.06667
Csnk2b	0.925628	0.13749	0.211551	-0.599722	0.00258535	0.610182	0.534855	0.00134127
Csrp1	2.2289	0.0626189	1.75182	-0.43709	8.46576e-05	0.887549	0.00297595	0.149636
Cst3	0.377625	-0.272626	NA	-0.497689	0.61034	0.61677	NA	0.180967
Cstf1	-0.0901805	0.251091	0.432023	0.751416	0.879259	0.457162	0.321565	0.00674393
Cstf2	0.0156035	0.181516	-0.110425	0.0323836	0.975535	0.604832	0.839111	0.923247
Cstf2t	-0.490421	0.277248	-0.404424	0.341798	0.28723	0.435995	0.361596	0.298986
Cstf3	-0.0235755	-0.868246	0.373403	-0.495605	0.972472	0.0040218	0.402092	0.114248
Ctage5	-0.29734	0.00420547	0.17282	0.458881	0.65795	0.996484	0.805529	0.218679
Ctbp1	1.31906	0.318211	1.69325	0.669567	0.000555233	0.166924	5.47587e-08	0.000519169
Ctc1	-0.54642	-0.119582	0.546193	0.950487	0.221043	0.713005	0.143774	8.83405e-05
Ctcf	-0.284936	-0.537527	0.0531582	-0.222487	0.396305	0.00763621	0.878747	0.291159
Ctdp1	-1.32274	0.0352613	-0.633829	0.704361	0.000476789	0.923233	0.0861334	0.00809584
Ctdspl2	1.47231	0.621637	NA	-0.13925	0.0703158	0.256367	NA	0.770929
Ctnna1	-0.540313	-0.250728	0.0445929	0.310603	0.0722613	0.221367	0.891564	0.105428
Ctnnal1	0.252694	-0.356055	0.506182	-0.12394	0.722177	0.426425	0.43842	0.771303
Ctnnb1	0.0754109	0.129272	0.42171	0.452687	0.865377	0.594386	0.128594	0.020163
Ctnnbl1	-0.0787311	0.069285	0.0413028	0.17571	0.897361	0.864276	0.938518	0.60084
Ctnnd1	-0.523016	0.0545881	-0.0080731	0.545838	0.196492	0.879692	0.990245	0.0341225
Ctps	0.629905	-0.178618	1.08265	0.252126	0.198262	0.6055	0.00667024	0.397639
Ctr9	-1.28797	-0.728478	-0.261586	0.273922	2.60302e-05	0.00113324	0.343104	0.286623
Ctsa	0.977751	0.181171	0.644642	-0.172588	0.150741	0.671052	0.379075	0.66188
Ctsb	0.0351066	0.985225	-0.808374	0.118493	0.908152	2.87203e-13	3.22699e-05	0.414464
Ctsd	0.679753	0.43565	0.530274	0.263137	0.0120159	0.00562041	0.00691271	0.0834195
Ctse	0.145442	1.09857	NA	0.389921	0.825429	0.00182474	NA	0.205867
Ctsf	-0.455336	0.981228	-2.53383	-1.11931	0.295929	0.0176576	2.24192e-10	1.79218e-05
Ctsz	1.17683	-0.125454	1.02779	-0.299906	0.0308897	0.784014	0.0706382	0.41403
Cttn	0.0703805	-0.161181	-0.0521456	-0.305267	0.909465	0.71311	0.941628	0.356355
Cuedc2	0.898685	-0.150026	0.906725	-0.164796	0.0245054	0.64074	0.011957	0.540766
Cul1	0.208853	0.323408	0.517266	0.608935	0.620023	0.175173	0.103584	0.00227908
Cul2	-0.45191	0.131814	0.169339	0.728981	0.331016	0.717407	0.738523	0.00609936
Cul3	-0.299011	-0.500173	0.414487	0.190562	0.463758	0.0324857	0.185946	0.450599
Cul4a	-0.492817	0.167683	-0.342244	0.294989	0.084794	0.411806	0.106304	0.0881103
Cul4b	0.199132	0.213961	0.715727	0.707452	0.733111	0.540108	0.096916	0.0113213
Cul5	-0.0442787	-0.193772	0.259487	0.0843556	0.954422	0.64839	0.657911	0.835132
Cuta	0.118461	0.0523314	NA	-0.571193	0.865693	0.939141	NA	0.17939
Cux1	-1.34328	-1.00212	-0.704525	-0.387009	1.35997e-05	3.97581e-05	0.00514509	0.140806
Cwc15	-0.119716	-1.22596	0.0974491	-1.03167	0.808024	1.68773e-05	0.839287	8.59594e-05
Cwc22	-1.43859	-0.875351	-0.394663	0.144584	0.00838691	0.0588259	0.49767	0.830539
Cwc25	0.43241	-0.533505	0.820027	-0.168806	0.592572	0.231204	0.277263	0.714728
Cwf19l2	-0.550696	-0.650031	-0.0135255	-0.134081	0.310997	0.188541	0.988681	0.79927
Cxxc1	-0.695652	-0.80417	-0.169821	-0.301201	0.140759	0.0153401	0.757112	0.390859
Cyb5	0.449867	-0.108345	-1.14633	-1.72799	0.175199	0.745547	2.34035e-05	2.1289e-21
Cyb5b	0.366733	0.260737	NA	-0.790994	0.591006	0.699846	NA	0.0341112
Cyb5d2	-0.547366	NA	NA	-1.26615	0.373531	NA	NA	0.0158313
Cyb5r1	-0.185489	1.07887	NA	-0.212892	0.778599	0.0097341	NA	0.561597
Cyb5r3	-0.0790945	0.201021	-0.469847	-0.213048	0.811558	0.277612	0.0131543	0.178999
Cyc1	0.589874	0.21451	0.384131	-0.0144583	0.0777628	0.387007	0.204115	0.955141
Cyld	0.0616076	-0.49602	0.745764	0.165527	0.937731	0.235087	0.255597	0.701315
Cyp51	-0.0771215	0.580631	NA	0.358895	0.946665	0.413003	NA	0.505689
Cyth2	1.05296	-0.446176	1.14102	-0.379656	0.0859187	0.271274	0.0653243	0.278973
Cyth3	-0.0261366	-0.101823	0.111904	0.0133788	0.964622	0.772829	0.831912	0.966482
D030056L22Rik	0.0166571	0.127162	0.326645	0.415737	0.977562	0.755943	0.519706	0.187459
D10Jhu81e	1.00608	0.16589	0.680807	-0.17868	0.0733878	0.703605	0.28298	0.64094
D17Wsu104e	1.05562	0.700545	NA	-0.702798	0.0716177	0.149399	NA	0.0468545
D17Wsu92e	0.106601	0.20793	NA	0.182719	0.915079	0.745592	NA	0.733867
D19Bwg1357e	-0.454838	-0.140939	-0.173008	0.114184	0.435414	0.766937	0.802333	0.797825
D1Ertd622e	0.443345	0.0371793	0.384943	-0.0426562	0.4618	0.936541	0.545905	0.918029
D230025D16Rik	0.49844	1.05159	NA	0.428578	0.549944	0.0116716	NA	0.23929
D5Ertd579e	-1.24407	-0.377158	-0.63802	0.205381	0.000664348	0.220312	0.0612557	0.506035
D6Wsu163e	-0.585896	-0.0844779	-0.307906	0.168995	0.144292	0.818344	0.436708	0.630174
D8Ertd738e	0.695323	0.381315	-0.645464	-0.982826	0.0475854	0.227316	0.0706382	2.567e-06
D930015E06Rik	-1.42405	-0.398625	-1.17924	-0.177144	4.02481e-07	0.0823943	1.45659e-08	0.456693
Daam1	-0.867974	-0.255675	-0.385023	0.20431	0.00169073	0.23684	0.0795571	0.32709
Dad1	0.278009	0.405526	0.149093	0.253624	0.600816	0.257373	0.805156	0.421383
Daglb	-0.726863	-0.60536	-0.0670154	0.0294739	0.213634	0.0879031	0.941628	0.933018
Dalrd3	1.10031	0.398773	NA	-0.266204	0.250086	0.531933	NA	0.571309
Dap3	0.493175	0.234196	0.640414	0.359613	0.279531	0.465035	0.114526	0.169275
Dapk2	-0.0978453	0.526842	-1.12448	-0.521844	0.840128	0.0765243	0.000946137	0.0212374
Dapk3	0.38167	0.127735	NA	-0.0119206	0.590309	0.794151	NA	0.976816
Dapp1	0.360529	-0.345946	-0.00320073	-0.725732	0.489261	0.401107	0.99638	0.0174363
Dars	0.821471	0.172769	0.653175	-0.0184732	0.0362316	0.585674	0.0777558	0.952027
Dars2	-0.176533	0.518803	0.277672	0.950692	0.773973	0.100127	0.595432	0.000338327
Daxx	0.0673867	-0.186361	NA	-0.433908	0.935433	0.793826	NA	0.363439
Dazap1	0.582271	-0.20704	0.736832	-0.0760982	0.101546	0.40245	0.00767479	0.759026
Dazap2	0.149392	0.70282	-0.044935	0.485412	0.766123	0.00779179	0.938613	0.0342408
Dbf4	0.0628119	0.251521	-0.0141172	0.151119	0.902248	0.404716	0.980551	0.580827
Dbi	-0.281424	-0.650981	-0.204687	-0.59251	0.459924	0.0402096	0.583655	0.0451622
Dbnl	1.0637	-0.145713	0.764068	-0.466907	0.0189798	0.70237	0.0918226	0.0802711
Dbr1	0.721979	-0.313259	0.937566	-0.121727	0.208056	0.429914	0.0751623	0.758347
Dcaf10	0.107061	0.614453	0.300031	0.785581	0.875311	0.071626	0.637886	0.00668645
Dcaf11	-0.135488	-0.396734	0.256739	-0.0271379	0.817756	0.250588	0.611376	0.945811
Dcaf12	-0.715696	0.745349	-1.01747	0.419809	0.015444	0.000274102	3.82754e-06	0.0251989
Dcaf13	0.52765	-0.426002	1.21307	0.237622	0.24307	0.187241	0.000356905	0.49581
Dcaf15	0.297239	-0.118124	0.774755	0.334654	0.601043	0.760975	0.0800941	0.268334
Dcaf6	-0.667765	0.102179	-0.452078	0.294155	0.0554844	0.721236	0.133711	0.19432
Dcaf7	0.350716	0.741685	0.203721	0.572338	0.445218	0.004161	0.673069	0.0128704
Dcaf8	-0.632098	-0.27515	-0.565696	-0.232272	0.0503159	0.246104	0.0231432	0.30132
Dck	0.793629	0.489965	0.243261	-0.0839294	0.00210504	0.00368249	0.281189	0.639272
Dclk2	0.168495	NA	NA	-1.37529	0.81624	NA	NA	0.000254967
Dclre1b	-0.312169	-0.250453	-0.22099	-0.181523	0.613161	0.59758	0.742914	0.658612
Dcp1a	-0.59521	0.311426	NA	0.160072	0.301979	0.482028	NA	0.683635
Dcps	0.517407	0.0307724	0.121185	-0.386513	0.272085	0.946662	0.837026	0.227216
Dctn1	-0.756661	-0.286502	-0.140385	0.306694	0.0112607	0.195616	0.628798	0.137879
Dctn2	0.647571	0.201034	0.206741	-0.262614	0.084794	0.462397	0.611613	0.250469
Dctn3	1.09837	0.134684	0.243124	-0.744444	0.00449926	0.714473	0.628798	0.00113078
Dctn4	0.05515	0.708899	-0.384431	0.246352	0.910379	0.005608	0.310545	0.312092
Dctn5	-0.425626	0.423179	-0.872605	-0.0468439	0.364288	0.254432	0.0372791	0.901291
Dctn6	-0.322821	-0.812548	-0.503787	-1.01526	0.419936	0.00335813	0.139774	7.69336e-05
Dctpp1	1.31087	0.796053	NA	-0.397006	0.00724657	0.0394315	NA	0.202159
Dcun1d1	1.29107	NA	NA	-0.104683	0.246838	NA	NA	0.875259
Dcun1d2	0.395096	NA	NA	-1.61874	0.660537	NA	NA	0.00749519
Dcun1d5	0.840625	0.0726403	0.65338	-0.136609	0.163194	0.887549	0.339489	0.732554
Dda1	0.86006	0.830145	NA	-0.582652	0.0905944	0.047675	NA	0.0564675
Ddb1	-0.80964	-0.00991915	-0.02602	0.750126	0.00033207	0.958795	0.933563	5.37623e-10
Ddhd1	-0.524783	-0.364641	-0.0317947	0.105518	0.173738	0.15986	0.946601	0.683929
Ddi2	1.15675	0.912898	0.575396	0.306296	0.0302626	0.00473687	0.379075	0.309782
Ddit3	-3.59154	-3.01831	-1.06039	NA	4.10897e-10	4.79053e-13	0.0121671	NA
Ddost	0.783877	0.483916	0.696222	0.373989	0.0481221	0.0467359	0.0573856	0.0870989
Ddrgk1	0.902153	0.8325	NA	-0.142638	0.12785	0.0298327	NA	0.703031
Ddx1	0.231516	0.192377	0.194082	0.131825	0.562493	0.462397	0.579868	0.5858
Ddx10	-0.798102	0.216757	NA	0.501154	0.253957	0.760422	NA	0.347511
Ddx17	-0.846757	-0.654612	-0.0387816	0.129913	0.00213338	0.00011898	0.903694	0.53088
Ddx18	1.62319	NA	NA	0.335802	0.210616	NA	NA	0.63083
Ddx19a	1.9213	0.160028	1.53164	-0.251865	0.000127017	0.690098	0.00349569	0.408385
Ddx20	-0.310852	0.0691918	0.335615	0.692682	0.53838	0.860754	0.442431	0.0152207
Ddx21	-0.196512	-0.497083	0.410132	0.0870608	0.639714	0.0375	0.175567	0.756096
Ddx23	-0.479811	-0.10446	-0.232587	0.119667	0.194598	0.737111	0.502448	0.656593
Ddx24	-0.669118	-0.018566	-0.368149	0.259377	0.0286754	0.952308	0.154449	0.23942
Ddx26b	-0.404942	-1.09063	-0.779048	-1.48812	0.263282	6.17291e-07	0.00293359	5.3713e-14
Ddx27	0.416411	-0.0337349	0.311356	-0.16183	0.327314	0.92515	0.443561	0.542133
Ddx28	-0.717674	-0.270284	NA	-0.0874434	0.323242	0.664939	NA	0.891513
Ddx39	0.308949	-0.372714	0.299461	-0.406005	0.300948	0.0383959	0.167901	0.0114651
Ddx39b	-0.308525	-0.0983998	-0.0779375	0.108675	0.359915	0.699846	0.816181	0.630174
Ddx3x	-0.0403355	-0.159592	0.230513	0.0876992	0.911094	0.405325	0.288842	0.641397
Ddx3y	-0.799755	-0.810583	-0.120004	-0.151961	0.149698	0.0133831	0.868322	0.686637
Ddx41	-0.310445	-0.422852	-0.091976	-0.227339	0.632109	0.330497	0.911326	0.555153
Ddx42	-0.75747	0.192336	-0.367888	0.55923	0.0568343	0.555546	0.353625	0.0235821
Ddx46	-0.742985	-0.719099	-0.0033637	-0.00304261	0.0152223	0.00031291	0.994688	0.98999
Ddx47	0.0785468	-0.307979	0.375335	-0.0342934	0.865539	0.223008	0.246732	0.90492
Ddx49	-0.0245549	0.114204	-0.0716923	0.0465528	0.972664	0.795255	0.917116	0.91947
Ddx5	-0.40222	-0.0713304	-0.0268459	0.280148	0.16008	0.737407	0.928281	0.0907423
Ddx52	-0.408846	0.282	0.42395	1.09283	0.462938	0.428575	0.381602	7.57498e-05
Ddx54	0.147932	-0.282068	0.465888	0.0114284	0.817696	0.473631	0.362193	0.977685
Ddx56	0.154119	0.209146	0.388457	0.423436	0.811558	0.608881	0.489065	0.227163
Ddx6	-0.425416	-0.047329	-0.195561	0.159038	0.175716	0.863348	0.456785	0.470556
Dedd	0.102511	NA	NA	-0.439358	0.91466	NA	NA	0.459228
Dedd2	-1.07412	-0.0459372	-0.975883	0.0291806	0.000616556	0.892656	0.000153698	0.920634
Degs1	0.623725	0.69903	0.257237	0.311812	0.223076	0.0288453	0.674687	0.273606
Dek	0.251038	-0.328532	-0.457155	-1.06046	0.327193	0.0324857	0.0171629	8.38708e-19
Dennd1a	-0.732407	-0.12582	-0.654386	-0.0703263	0.0935105	0.766285	0.113468	0.848612
Dennd2c	-0.87703	-0.772796	-1.00531	-0.923741	0.0253322	0.0222043	0.00461264	0.00120176
Dennd4a	-1.3961	-0.706701	-0.593352	0.0725189	1.41022e-09	1.87023e-06	0.000907201	0.706391
Dennd4c	-1.88649	-0.218812	-0.574891	1.06885	2.68e-06	0.562479	0.136049	0.000714636
Denr	0.386423	-2.10498	0.799563	-1.71328	0.594156	2.52352e-05	0.238539	0.000468092
Depdc1a	-1.09476	0.372273	-0.973415	0.466588	0.0182815	0.385911	0.0243547	0.204975
Depdc1b	0.566544	0.0787228	0.383564	-0.127103	0.0812735	0.774282	0.172751	0.572894
Dera	0.759478	0.0613927	0.621996	-0.0945272	0.146851	0.887821	0.212296	0.796468
Derl1	0.516028	0.689529	0.190795	0.341907	0.307138	0.0250942	0.741982	0.234011
Dgcr2	0.43793	0.308023	NA	-0.805268	0.627807	0.713005	NA	0.082891
Dgcr8	-0.798011	-0.253709	-0.26438	0.257826	0.109397	0.502343	0.624246	0.455702
Dguok	0.463107	NA	NA	-0.673649	0.561169	NA	NA	0.21557
Dhcr24	-0.662141	-0.226152	-0.243601	0.168953	0.088424	0.512812	0.560838	0.570566
Dhdds	0.581134	0.73344	0.10579	0.233631	0.308043	0.0419014	0.896123	0.507894
Dhfr	0.920416	0.691561	0.254899	0.0029429	0.0131821	0.00977502	0.567724	0.991912
Dhps	0.709598	0.794189	NA	-0.0431833	0.470328	0.271274	NA	0.945811
Dhrs11	-0.263037	-0.154248	-0.888009	-0.802837	0.324106	0.3951	1.66192e-07	3.52e-10
Dhrs13	-0.285088	0.807008	-0.451118	0.620117	0.632701	0.0264619	0.44565	0.0376369
Dhrs4	0.0539393	0.0160578	-0.290075	-0.349224	0.91466	0.968559	0.506686	0.18661
Dhrs7b	-0.388297	NA	NA	-0.331716	0.654193	NA	NA	0.567307
Dhx15	-0.442483	0.0441228	0.299887	0.763365	0.13861	0.845245	0.166378	1.75393e-06
Dhx16	-0.576128	-0.532322	0.423616	0.444151	0.174032	0.037806	0.246658	0.0819019
Dhx29	-0.58948	-0.932661	0.846328	0.481363	0.402851	0.0164367	0.125692	0.297798
Dhx30	-0.740711	-0.613949	0.576005	0.681464	0.218512	0.0792194	0.266254	0.0412073
Dhx32	-1.39402	-0.740616	-0.385615	0.244896	0.00369428	0.0494885	0.446494	0.550071
Dhx36	-0.293812	0.111915	0.231405	0.613926	0.461777	0.700424	0.484196	0.00636975
Dhx37	0.0152005	-0.397618	NA	-0.0632429	0.971707	0.451059	NA	0.910793
Dhx38	-1.22623	-0.905746	-0.227014	0.070315	0.00244804	0.00181785	0.622961	0.847611
Dhx40	0.203365	-0.0554497	-0.0238462	-0.305918	0.666802	0.887549	0.969011	0.235738
Dhx8	-0.947194	-0.655423	-0.148554	0.119559	0.000911718	0.000944725	0.583119	0.616108
Dhx9	-0.865302	-0.180017	-0.150205	0.511714	0.0006769	0.334761	0.512897	0.00104761
Diablo	1.45658	0.127806	0.845977	-0.50596	0.000707634	0.745547	0.0695437	0.0563403
Diap1	-0.823583	0.273414	-0.0411882	1.03299	0.0369158	0.350584	0.938286	5.73961e-06
Diap3	-0.995902	-0.300769	-0.492659	0.179102	6.29443e-05	0.0954196	0.00842477	0.345161
Dicer1	-1.01013	-0.0858374	-0.212412	0.68906	0.0271062	0.831976	0.682625	0.020893
Dido1	-1.85845	-0.871907	-1.03298	-0.0696476	3.94894e-09	0.000679357	5.54609e-05	0.828767
Dis3	0.187782	0.324553	0.672967	0.785601	0.75396	0.340972	0.139774	0.00595668
Dis3l	-0.248081	0.363705	0.135816	0.725052	0.714642	0.360821	0.848676	0.0216852
Dis3l2	1.28268	0.208083	NA	0.43221	0.18701	0.701832	NA	0.340653
Dkc1	-0.220425	-0.577233	-0.0691254	-0.449582	0.550872	0.00911403	0.846908	0.0328895
Dlat	-0.110177	-0.369618	0.844502	0.563862	0.882265	0.292345	0.0669874	0.0751289
Dld	0.272419	0.769797	-0.0408178	0.433646	0.463034	0.000219451	0.925864	0.0268572
Dlg1	-0.463763	-0.491246	0.225647	0.175064	0.320721	0.104888	0.628798	0.595875
Dlgap5	-0.543196	-0.580895	-0.453049	-0.514454	0.0302626	0.000219451	0.0153111	0.00043446
Dlst	0.189207	-0.33706	0.368034	-0.181127	0.604978	0.114686	0.153892	0.397457
Dmap1	0.434685	-0.487788	NA	-0.266214	0.572861	0.345416	NA	0.571994
Dmtn	0.490817	-0.0222493	0.205898	-0.330396	0.0826171	0.929488	0.379946	0.0414363
Dmxl1	-1.46028	-0.28582	-0.795369	0.355824	1.16585e-06	0.272073	0.00111116	0.126649
Dna2	-0.516284	-0.110171	-0.0479713	0.335124	0.14345	0.690098	0.908435	0.130011
Dnaaf2	-1.0809	0.429926	NA	0.39583	0.0377435	0.382636	NA	0.34454
Dnaja1	-0.505347	0.372813	NA	0.69576	0.589946	0.419714	NA	0.0567897
Dnaja2	-0.062019	-0.394764	0.496303	0.140269	0.887714	0.0611445	0.0494579	0.541612
Dnaja3	0.0790463	0.334451	0.665583	0.893505	0.91811	0.416988	0.303201	0.0062205
Dnaja4	0.0535465	0.336625	-0.558797	-0.298487	0.905289	0.115455	0.0551905	0.108171
Dnajb1	0.616792	0.0650236	0.537498	-0.0375649	0.0783168	0.798966	0.082468	0.868668
Dnajb11	0.158781	0.377417	-0.502744	-0.307114	0.70659	0.179535	0.150122	0.174327
Dnajb12	0.183867	0.0506509	0.00528582	-0.142034	0.776881	0.91394	0.994438	0.702324
Dnajb2	0.22689	0.0311557	-0.719074	-0.936723	0.615698	0.937645	0.0720257	2.67245e-05
Dnajb3	-0.0946891	0.917051	NA	-0.00312134	0.94092	0.247853	NA	0.996667
Dnajb4	-0.894141	-0.317723	-0.60761	-0.0546851	0.000425779	0.0856345	0.000892583	0.796162
Dnajb6	0.199683	0.310084	NA	-0.963647	0.733645	0.544506	NA	0.00215542
Dnajb9	-0.467008	3.65387	NA	-1.46698	0.608753	0.00758305	NA	0.00117702
Dnajc10	0.217119	0.53551	0.46015	0.756762	0.754918	0.16765	0.481058	0.0173659
Dnajc11	-0.354431	-0.57732	-0.0629657	-0.309015	0.307255	0.00929983	0.870624	0.154561
Dnajc13	-1.70786	-0.414596	-0.594332	0.67557	6.96473e-06	0.229729	0.114114	0.0309235
Dnajc15	0.73117	NA	NA	-0.349869	0.336073	NA	NA	0.574831
Dnajc16	-0.962946	0.983463	NA	0.800198	0.177419	0.0286375	NA	0.0279417
Dnajc19	2.01527	NA	NA	-0.173013	0.158238	NA	NA	0.830599
Dnajc3	0.734188	0.669029	0.116776	0.0282416	0.14121	0.0522085	0.869504	0.941758
Dnajc5	0.12671	-0.580065	NA	-0.386031	0.890638	0.265912	NA	0.461653
Dnajc7	0.102637	-0.732058	0.0860601	-0.772717	0.845258	0.0161877	0.87939	0.00421636
Dnajc8	0.820355	0.000460074	0.22531	-0.617518	0.0132168	0.999591	0.535155	0.00182518
Dnajc9	0.900288	0.216724	0.0540731	-0.652913	0.00217489	0.381174	0.89551	0.000196651
Dnase1l1	-0.289777	-0.444229	-0.727767	-0.903716	0.601383	0.289469	0.142113	0.00260271
Dnase2a	0.930019	-0.110709	1.21125	0.147865	0.148857	0.794151	0.0258118	0.716196
Dnm1l	-0.143404	-0.00230189	0.270408	0.388673	0.765982	0.996614	0.474581	0.0995988
Dnm2	-0.233425	-0.0682443	0.167941	0.309784	0.50603	0.780451	0.546486	0.0959516
Dnmt1	-1.13897	-0.219688	-0.188796	0.706743	2.28853e-07	0.143544	0.413249	2.81901e-08
Dnpep	0.311657	0.268705	NA	-0.0713889	0.647161	0.58534	NA	0.869192
Dnph1	1.69903	NA	NA	-0.597638	0.0838842	NA	NA	0.300688
Dnttip1	-0.794045	-0.146502	-1.27309	-0.648867	0.0207694	0.668809	7.08975e-06	0.0039252
Dnttip2	0.041885	-0.313063	-0.0491351	-0.426013	0.947457	0.457596	0.946601	0.21248
Dohh	-0.494571	-0.0995016	NA	-0.361397	0.36296	0.847271	NA	0.296187
Dok1	-0.26284	0.231722	-0.393305	0.0783015	0.524473	0.450804	0.27021	0.778123
Dok4	1.24629	NA	NA	-2.28202	0.0361097	NA	NA	1.68391e-12
Donson	-0.376979	-0.0449038	0.0485674	0.357793	0.331131	0.889091	0.912958	0.118591
Dopey2	-1.37803	-0.661328	-0.201722	0.491955	0.00080029	0.0213528	0.667638	0.106808
Dot1l	-0.874974	-0.66857	-0.0280068	0.155298	0.0345029	0.0173583	0.958741	0.633737
Dpf2	0.0763788	0.317641	-0.152436	0.0646495	0.871666	0.232556	0.719665	0.813581
Dpm1	0.465196	0.7071	-0.634493	-0.416473	0.250845	0.0164367	0.106895	0.112992
Dpm3	1.02815	-0.213547	NA	-0.356912	0.263912	0.72864	NA	0.516717
Dpp3	-0.356632	-0.282682	0.503523	0.554109	0.419936	0.344387	0.171625	0.0251507
Dpp8	-0.330818	0.0594181	0.228079	0.596772	0.577734	0.887902	0.686381	0.0499503
Dpp9	-0.102762	-0.782265	1.30979	0.610349	0.916855	0.0264542	0.0118655	0.105442
Dpy19l1	-0.491089	-0.155643	0.431589	0.743842	0.262627	0.611898	0.245438	0.0019661
Dpy30	2.78051	0.0890555	NA	-0.897544	1.64709e-05	0.869345	NA	0.00469491
Dpysl2	0.14972	NA	NA	0.887769	0.923642	NA	NA	0.28964
Dr1	0.466652	0.406091	NA	-1.5028	0.401801	0.561792	NA	4.52909e-06
Drap1	-0.856046	-0.763729	NA	-0.483169	0.128788	0.126345	NA	0.283989
Drg1	0.499366	-0.13892	0.945913	0.284989	0.222188	0.633924	0.00286507	0.231013
Drg2	0.667944	0.324571	0.306916	-0.0588329	0.254556	0.457596	0.68258	0.88928
Drosha	-1.31146	-0.714162	-0.0627118	0.511375	0.000552462	0.0121065	0.905008	0.0870989
Dscc1	0.720664	0.570298	0.440467	0.271341	0.167384	0.123646	0.43448	0.476691
Dsn1	0.282874	-0.469608	0.150497	-0.624885	0.513262	0.0917901	0.738869	0.00695956
Dstn	-0.459489	0.579231	-1.77783	-0.762726	0.165945	0.0404224	7.28174e-12	0.000187483
Dstyk	-0.495034	-0.0225681	NA	-0.185874	0.410911	0.977053	NA	0.633737
Dtd1	2.03514	NA	NA	-0.354582	0.200239	NA	NA	0.690647
Dtl	-0.680432	0.107198	-0.365627	0.398735	0.0305899	0.690098	0.172062	0.0529278
Dtnb	0.525346	-0.323086	NA	0.186639	0.586245	0.521575	NA	0.698754
Dtwd1	0.389433	0.202764	NA	-0.0500028	0.577775	0.67841	NA	0.913675
Dtx3l	-0.772962	0.73856	-1.41841	0.0629388	0.0726268	0.158099	0.00176357	0.904909
Dtymk	0.936832	0.220041	0.515386	-0.223791	0.018032	0.489645	0.21375	0.389303
Dus1l	0.936973	0.112335	0.836681	-0.0121849	0.175607	0.818344	0.309819	0.976643
Dusp1	-0.324159	-1.02574	-0.390508	-1.11535	0.34037	9.20489e-08	0.145318	5.77837e-11
Dusp11	-0.261398	0.299773	-0.515233	0.0226549	0.563019	0.342498	0.173911	0.945811
Dut	0.0639737	0.162892	-0.665974	-0.590604	0.884222	0.589747	0.0217619	0.00501834
Dvl3	0.604886	NA	NA	-0.246143	0.598248	NA	NA	0.71009
Dxo	-0.430655	-1.8971	0.178559	-1.30936	0.459261	1.4228e-07	0.777382	0.000146592
Dym	-0.265982	0.17794	0.314086	0.736035	0.624241	0.609248	0.503966	0.00559196
Dync1h1	-1.78993	-0.74953	-0.849037	0.167325	1.15473e-13	3.06596e-05	1.13021e-06	0.424887
Dync1i2	-0.173622	0.191446	0.00817641	0.352117	0.669038	0.467613	0.983254	0.104579
Dync1li1	0.611214	-0.00651037	0.61054	-0.0304592	0.123029	0.988692	0.0842019	0.920634
Dync1li2	0.325449	0.135842	-0.193974	-0.405583	0.592855	0.779586	0.80545	0.23162
Dync2h1	-1.06943	NA	NA	-0.384322	0.115306	NA	NA	0.556892
Dynll1	1.8801	1.17493	0.0840589	-0.643872	4.05344e-08	1.24243e-05	0.891564	0.00148439
Dynll2	2.36351	NA	NA	-2.0798	0.00115411	NA	NA	5.87204e-08
Dynlrb1	-0.174425	-0.481257	-0.928618	-1.25975	0.692429	0.15511	0.00581346	4.9698e-07
Dynlt3	1.48141	NA	NA	-1.50608	0.154747	NA	NA	0.0111831
Dyrk1a	-0.932822	0.0716806	-0.134743	0.8465	0.0200248	0.838472	0.782585	0.000681856
Dyrk3	-0.554262	-0.444516	-0.862124	-0.775935	0.0571071	0.0380026	1.82508e-05	1.22963e-05
E130309D02Rik	0.925234	0.326554	NA	-0.139823	0.281649	0.6055	NA	0.787445
E130309D14Rik	-0.611903	0.2761	-1.96008	-1.09504	0.0642924	0.399211	5.5891e-14	1.53955e-07
E2f1	0.121725	-0.703992	NA	-0.0263949	0.907543	0.177962	NA	0.966482
E2f2	-0.198214	0.597362	-0.484571	0.288576	0.492636	8.74376e-05	0.00924036	0.0462828
E2f4	0.118528	0.133805	-0.0919468	-0.100068	0.715527	0.487847	0.725676	0.566739
E2f7	0.423857	-0.776157	0.725803	-0.496131	0.471421	0.0308459	0.164951	0.135599
E2f8	-0.0925475	-0.49615	0.650848	0.223218	0.81771	0.00826775	0.00283331	0.263092
E430025E21Rik	1.14093	0.461554	NA	0.0545658	0.206225	0.445564	NA	0.920304
E4f1	-0.330088	-1.17092	-0.0628866	-0.924428	0.667176	0.00424168	0.946068	0.0242488
Eaf1	0.532165	0.465746	-0.282179	-0.371891	0.201728	0.129349	0.544793	0.134001
Eapp	0.19079	0.201146	-0.300252	-0.310609	0.670379	0.556054	0.47082	0.283742
Ebna1bp2	0.261678	-0.7686	-0.122385	-1.17654	0.551419	0.0122588	0.806281	7.32754e-06
Ebp	0.947572	-0.163575	1.19563	0.0607615	0.0935105	0.69494	0.0141952	0.898542
Ecd	-0.132602	0.163376	0.0369608	0.310077	0.817756	0.662348	0.946601	0.310108
Ech1	-0.172491	-0.0295357	0.0389093	0.167079	0.781045	0.952961	0.952654	0.685139
Echdc1	-0.528651	-0.13181	-0.772646	-0.388641	0.323285	0.826893	0.202245	0.452151
Echs1	3.21696	0.489504	NA	0.240107	0.0379861	0.490966	NA	0.726206
Eci1	0.67913	0.0521051	0.219749	-0.427713	0.178216	0.915865	0.728226	0.212806
Eci2	0.748651	0.330434	NA	0.0149965	0.425505	0.556131	NA	0.978463
Ect2	-0.106868	-0.334035	0.40583	0.155024	0.770616	0.0755074	0.0564423	0.432504
Edc3	0.308235	0.213201	0.25212	0.135065	0.59223	0.585685	0.670366	0.696327
Edc4	-1.18521	-0.325543	-0.489843	0.347236	0.00213399	0.290264	0.195292	0.223449
Edem3	-0.158695	-0.131267	0.415745	0.421238	0.842083	0.774282	0.497267	0.241667
Edf1	0.804008	-0.364038	0.171329	-1.01999	0.00988487	0.168901	0.63853	8.07249e-08
Edrf1	-0.204388	0.0827825	0.128254	0.39315	0.697253	0.815604	0.805963	0.145593
Eea1	-0.740639	-0.483944	0.0129512	0.251781	0.0999201	0.149806	0.979035	0.460696
Eed	0.439567	-0.123817	0.0746859	-0.511147	0.446549	0.787259	0.921245	0.106808
Eef1a1	0.572789	1.75271	0.97004	2.12731	0.042918	3.51253e-37	5.51515e-08	2.07772e-62
Eef1b2	0.727919	1.29297	1.07923	1.62167	0.0513852	9.82252e-13	9.32749e-05	6.52278e-21
Eef1d	-0.118346	-0.265035	0.180335	0.0104428	0.678331	0.0696056	0.442569	0.954574
Eef1e1	2.22349	0.741537	NA	-0.882434	0.000186949	0.111306	NA	0.00722518
Eef1g	0.210757	1.5232	0.853041	2.1425	0.67792	1.50898e-12	0.0173726	9.32066e-26
Eef2	-0.257173	0.558684	0.385961	1.17816	0.314335	0.00014724	0.0872015	5.89785e-24
Eef2k	-0.527683	-0.453273	0.0345106	0.0855124	0.0808835	0.0238547	0.918802	0.707138
Eefsec	0.226119	-0.617346	0.97799	0.107867	0.801543	0.174552	0.192421	0.835628
Efhd2	0.338874	0.0472328	-0.28593	-0.599724	0.481594	0.914293	0.585523	0.0256955
Efr3a	0.0978996	0.964728	NA	1.35445	0.915415	0.0235605	NA	0.000261492
Eftud1	-1.49236	-0.272806	-0.439408	0.758915	0.00298632	0.580675	0.402092	0.0733934
Eftud2	-0.4795	-0.458308	0.457888	0.455452	0.0859187	0.00552545	0.0169043	0.00438861
Ehbp1l1	-0.595532	-0.624339	-0.165964	-0.217922	0.0209011	5.24606e-05	0.456513	0.182712
Ehd1	-0.293391	0.774824	-0.466751	0.577918	0.419066	0.000170556	0.0950952	0.00260271
Ehd4	-0.497856	-0.446664	0.177741	0.202536	0.358044	0.278921	0.772433	0.626421
Ehmt1	-0.357371	-0.761493	-0.115366	-0.540995	0.560595	0.0456365	0.874691	0.12917
Eid1	-1.18875	-0.444015	-0.732727	-0.0104593	0.00273107	0.184149	0.0522983	0.976816
Eif1	0.430199	0.592541	-0.169492	-0.0306357	0.268145	0.0193256	0.69465	0.916409
Eif1ad	1.01303	-0.0837513	NA	-0.874547	0.160933	0.915501	NA	0.0237678
Eif1ax	0.398891	-0.540843	-0.523687	-1.4866	0.205583	0.0327704	0.0434189	1.37805e-15
Eif1b	0.884769	0.863945	-0.343792	-0.388266	0.0721466	0.0221617	0.628798	0.217018
Eif2a	0.309654	0.197756	0.617626	0.483091	0.480918	0.502343	0.0764331	0.0507717
Eif2ak1	-0.465734	-0.583375	-0.159866	-0.301164	0.059113	3.48836e-05	0.481058	0.0347945
Eif2ak2	-0.341096	0.38318	-0.583238	0.11504	0.511912	0.41124	0.266211	0.764226
Eif2b1	0.189143	-0.388261	0.348617	-0.253744	0.773973	0.342337	0.568323	0.499866
Eif2b2	-0.189417	-0.303153	0.0231899	-0.107759	0.725624	0.402673	0.96607	0.748183
Eif2b3	-0.0578435	-0.0432518	0.0280119	0.023894	0.915079	0.915433	0.958741	0.960739
Eif2b4	-0.00985757	0.297886	0.40479	0.689918	0.989422	0.306291	0.301784	0.00532013
Eif2b5	-0.18597	-0.144186	0.479185	0.498176	0.740046	0.690098	0.266635	0.0703258
Eif2d	1.40848	-0.283418	2.01458	0.305946	0.079412	0.508245	0.00338635	0.424887
Eif2s1	0.416729	0.540912	0.338983	0.440036	0.232073	0.0129154	0.254222	0.027459
Eif2s2	0.758584	-0.282391	0.733075	-0.331191	0.0217464	0.245756	0.00359797	0.148706
Eif2s3x	1.10087	0.788224	NA	0.0542353	0.108924	0.118776	NA	0.916907
Eif2s3y	0.361304	-0.727587	0.437316	-0.674232	0.479512	0.0099536	0.356461	0.00747746
Eif3a	-1.65337	-0.537879	-0.352602	0.739402	1.18999e-14	0.000102095	0.101513	3.3756e-08
Eif3b	-0.377547	-0.145005	0.363963	0.573198	0.188323	0.455608	0.0692464	0.000207939
Eif3c	0.229325	0.0883281	0.697316	0.532599	0.450434	0.64839	9.36973e-05	0.000308094
Eif3d	-0.0499666	-0.177318	0.0715136	-0.0791429	0.88998	0.350348	0.790136	0.67196
Eif3e	0.934023	1.04077	0.999796	1.08465	0.0124619	6.14285e-07	0.00139737	1.72151e-08
Eif3f	0.354575	0.900456	0.750814	1.27346	0.345874	4.05648e-07	0.00288072	7.94567e-14
Eif3g	0.861744	0.130093	0.513761	-0.241641	0.00616165	0.618064	0.0688503	0.248343
Eif3h	0.926808	0.880381	0.695526	0.626867	0.00909656	2.75061e-05	0.0307474	0.00131179
Eif3i	0.405199	0.686489	0.0934407	0.35126	0.169893	4.60932e-05	0.744333	0.031304
Eif3k	0.74307	0.284023	0.477308	-0.00541036	0.00585918	0.120765	0.0210555	0.977685
Eif3l	0.351541	0.429728	0.369555	0.424394	0.22903	0.0118591	0.077156	0.00525437
Eif3m	0.788666	0.596577	0.557186	0.341763	0.0254604	0.00950123	0.0899091	0.125912
Eif4a1	-0.597843	0.28585	-0.392142	0.467888	0.0226236	0.124128	0.04651	0.00349584
Eif4a2	0.268374	-0.0579508	0.0948392	-0.25227	0.667279	0.89972	0.896123	0.450907
Eif4a3	0.378356	0.366524	0.461217	0.425875	0.336024	0.134769	0.171272	0.0506599
Eif4b	-0.293288	0.304778	0.181306	0.756248	0.452672	0.187709	0.586983	0.000163058
Eif4e	2.15652	0.727521	NA	0.462732	0.00761385	0.106017	NA	0.22668
Eif4e2	-0.526199	-0.824192	-0.903708	-1.22484	0.147376	0.00548047	0.00235404	2.2834e-07
Eif4enif1	-0.731372	0.0956731	-0.262443	0.542318	0.134735	0.811307	0.618359	0.0716675
Eif4g1	-1.09607	-0.810055	0.220486	0.483133	6.68652e-06	2.6204e-08	0.297031	0.00252143
Eif4g2	0.108655	-0.132263	-0.256879	-0.520944	0.725624	0.485381	0.214869	0.000182131
Eif4g3	-0.920759	-0.186944	-0.479143	0.233591	0.102844	0.704533	0.402008	0.594058
Eif4h	0.437382	-0.303842	0.320234	-0.444361	0.136229	0.111459	0.150303	0.0066798
Eif5	-0.842694	0.202732	-0.951216	0.0709486	0.000552462	0.290351	2.15773e-08	0.714843
Eif5a	1.39496	0.416881	0.635115	-0.366374	9.11292e-10	0.00728072	0.000419558	0.00631435
Eif5a2	1.74587	1.17171	NA	-0.331972	0.00483239	0.0163678	NA	0.364366
Eif5b	-1.14091	-0.592006	-0.401657	0.123993	1.49709e-06	0.000255323	0.0357055	0.520912
Eif6	0.0273522	-0.331149	0.163218	-0.217772	0.959838	0.352724	0.757681	0.494266
Elac2	-0.664864	-0.213242	0.0926169	0.522845	0.242325	0.640485	0.899542	0.14052
Elavl1	1.30786	0.427563	0.941691	0.0383942	6.16503e-05	0.061397	0.00116954	0.88928
Elf1	-0.0552289	0.448243	-0.515426	-0.0336919	0.931869	0.230279	0.305337	0.930466
Elf2	0.311282	-0.372398	0.38461	-0.320799	0.606254	0.363214	0.503589	0.367458
Ell	-0.903987	-0.283852	-0.423327	0.174771	0.109314	0.53985	0.469478	0.689764
Ell2	-0.471419	-0.0345366	0.0531699	0.46631	0.119239	0.893661	0.86714	0.00887989
Elmo2	-0.5377	-0.849952	-0.00945199	-0.344002	0.396159	0.0341604	0.995935	0.405447
Elmod2	1.45049	0.743167	1.225	0.48786	0.0732942	0.0508014	0.18105	0.202194
Elmsan1	-2.13007	-0.830288	-0.91665	0.359024	5.11024e-07	0.0206094	0.0185571	0.377665
Elof1	0.731787	-0.704785	0.619742	-0.838869	0.14345	0.0545103	0.215988	0.00560978
Elovl1	2.29104	0.552006	2.15508	0.391963	0.000853658	0.120067	0.00236876	0.227169
Elp2	-0.203729	-0.642514	0.582367	0.121845	0.715187	0.0600747	0.16437	0.770395
Elp3	0.206691	-0.277362	0.275598	-0.23562	0.764832	0.541876	0.692728	0.584075
Elp4	0.0648454	-0.332825	NA	0.132849	0.940157	0.52578	NA	0.794439
Elp5	-0.351258	0.244483	-1.21688	-0.64559	0.391958	0.52286	0.000241317	0.0162633
Emc1	-0.617972	0.0368663	0.0866855	0.718285	0.0829864	0.90654	0.819175	0.000703496
Emc10	0.689492	0.555705	0.0886648	-0.0679163	0.106473	0.0608248	0.883739	0.81796
Emc2	0.689792	-0.0837676	0.780952	-0.0140841	0.26951	0.873018	0.220177	0.9732
Emc3	1.45713	0.250206	0.837317	-0.392762	0.00631412	0.530813	0.181721	0.187055
Emc7	0.842386	0.31235	0.373033	-0.181825	0.0960851	0.402742	0.511814	0.591561
Emc8	0.238144	-0.734694	-0.148044	-1.14454	0.667176	0.0610089	0.823048	0.000178545
Emc9	-0.424381	0.0325993	NA	-0.0354313	0.582658	0.970358	NA	0.950325
Emd	0.517392	0.916887	-0.477931	-0.102617	0.270785	0.00848267	0.361596	0.759026
Eme1	-0.812458	-0.701691	-1.0304	-0.942679	0.100317	0.0948519	0.0229185	0.00542241
Emg1	1.32674	-0.21764	0.856117	-0.711413	0.00115411	0.543783	0.0426313	0.0034983
Emilin2	-0.838543	-0.659655	-0.367804	-0.213127	0.0145619	0.00911403	0.246732	0.425473
Endod1	0.243753	0.943601	-0.15349	0.523226	0.47155	6.22619e-08	0.61587	0.00117863
Ensa	0.495985	-0.967122	-0.552255	-2.03722	0.311609	0.016722	0.289887	2.76146e-12
Eny2	-0.312897	0.234285	-1.11352	-0.588361	0.348408	0.460124	3.70113e-06	0.0178853
Ep300	-1.61913	-1.14285	-0.555941	-0.102683	4.056e-08	2.5082e-08	0.0177307	0.712118
Ep400	-1.61322	-0.424433	-1.4275	-0.262618	2.03445e-09	0.0668226	4.97404e-13	0.243847
Epb4.1	-0.820713	0.141309	-1.37736	-0.439269	5.46888e-05	0.479694	5.12874e-09	0.000562626
Epb4.2	-0.936592	0.00308386	-0.795534	0.12069	4.9902e-06	0.992895	0.000599528	0.403479
Epc1	0.18293	-1.79183	0.745698	-1.25065	0.808148	8.64752e-07	0.212199	0.000576443
Epc2	-0.863328	NA	NA	-0.647763	0.217065	NA	NA	0.289645
Epg5	-1.61233	-1.02123	-0.419207	0.148264	1.01929e-06	1.95398e-05	0.160703	0.631061
Epn1	1.24548	-0.227378	1.07197	-0.423445	0.0116924	0.546087	0.0245272	0.140806
Epor	0.219682	0.100461	0.266625	0.124352	0.511912	0.640141	0.265439	0.508124
Eprs	-1.04187	-0.160306	-0.000380124	0.858048	8.32243e-05	0.431481	0.998973	4.73758e-07
Eps15	-0.0865682	0.210553	-0.0166244	0.257709	0.830822	0.374149	0.96607	0.209753
Eps15l1	0.148643	-0.0996687	-0.00360336	-0.274912	0.736401	0.745547	0.99638	0.233068
Eral1	1.40868	NA	NA	-0.479496	0.170202	NA	NA	0.364366
Erbb2ip	-1.54768	0.658813	NA	0.63036	0.0044388	0.163409	NA	0.106692
Erc1	-1.72174	-0.846749	-0.21463	0.637415	0.000642902	0.0238573	0.718642	0.123615
Ercc1	0.00464313	NA	NA	-0.0430804	0.993154	NA	NA	0.950325
Ercc3	-0.60039	-0.906865	0.0752913	-0.25295	0.217849	0.00800075	0.905008	0.484565
Ercc5	-1.50953	-1.03588	-0.533113	-0.0835205	0.00704942	0.0257664	0.355974	0.908096
Ercc6	-1.17804	-0.0853337	-0.497677	0.566598	0.0271062	0.863602	0.351089	0.152022
Ercc6l	-0.834117	0.146791	-0.273448	0.684363	0.00616339	0.567124	0.315396	0.000454447
Ergic2	0.650946	0.324669	NA	-0.368643	0.317187	0.50591	NA	0.315744
Ergic3	0.877825	1.10695	-0.0272178	0.178682	0.0817422	0.000493473	0.979035	0.551099
Eri1	0.254193	0.0408403	0.0714461	-0.164984	0.522591	0.902956	0.873405	0.507922
Eri2	-0.110003	0.14814	NA	0.0349384	0.907904	0.807139	NA	0.955141
Erlec1	0.394319	0.0291866	-0.0341073	-0.414816	0.553305	0.950215	0.975391	0.23929
Ermap	-1.34988	-0.954184	-1.17912	-0.806821	1.96819e-10	2.16739e-11	5.91345e-11	1.06135e-09
Ermp1	-0.532787	0.456198	-0.0281262	0.938193	0.21631	0.0839254	0.958741	2.78349e-05
Ero1l	-0.447025	1.0021	NA	0.781371	0.519699	0.0106512	NA	0.0329129
Erp29	0.287323	-0.182507	0.321272	-0.169551	0.633712	0.663056	0.586933	0.637003
Erp44	0.920014	0.244077	0.608421	-0.088748	0.097844	0.550773	0.309153	0.809382
Esco2	-0.00416388	-0.109451	0.0236491	-0.106607	0.997653	0.659323	0.944053	0.633737
Esd	0.153819	0.240833	-0.566845	-0.50349	0.665622	0.37446	0.0243547	0.0102
Esf1	-0.393524	0.512339	-0.34535	0.538659	0.381466	0.138482	0.419044	0.106808
Espl1	-1.69198	-0.540181	-0.71285	0.415107	2.05364e-12	0.00209839	4.9987e-05	0.020315
Esyt1	-0.0633341	-0.576309	0.660841	0.127584	0.94092	0.108988	0.196761	0.769019
Esyt2	-0.179213	0.367297	-0.113204	0.41089	0.735291	0.230297	0.841675	0.116659
Etf1	0.194944	0.147639	0.600219	0.530383	0.627082	0.561384	0.0271032	0.00739274
Etfa	0.679184	0.771871	0.343118	0.41173	0.0725013	0.00100316	0.36514	0.0640906
Etfb	-0.0282047	-0.0830325	-0.0776067	-0.156092	0.955337	0.802497	0.871266	0.576785
Etfdh	0.436376	-1.06547	0.807276	-0.716532	0.472273	0.00157573	0.119317	0.0236405
Etnk1	0.55383	-0.252472	0.871024	0.0447332	0.392054	0.55459	0.144121	0.917717
Evi5	-0.822685	-0.460422	-0.650165	-0.311321	0.0258935	0.114745	0.0448399	0.266669
Ewsr1	-0.917196	-0.0809993	-0.413017	0.400013	0.000924979	0.741456	0.0569145	0.0341661
Exo1	0.0428834	-0.52294	0.537659	-0.049204	0.949953	0.169345	0.339489	0.91083
Exoc1	-0.34918	-0.23598	0.0033639	0.0994146	0.577734	0.584217	0.998641	0.814691
Exoc2	-0.828983	-0.595965	-0.114831	0.0947615	0.0434056	0.0409947	0.818505	0.778123
Exoc3	-0.369776	-0.648294	0.0413498	-0.261458	0.330073	0.0077296	0.924616	0.298139
Exoc4	-0.736967	0.164411	-0.190323	0.688464	0.0344202	0.57052	0.585759	0.00286329
Exoc5	0.0302926	0.22723	0.282635	0.458169	0.96206	0.60335	0.666391	0.179548
Exoc6	0.425324	0.32927	0.555019	0.435629	0.272274	0.163409	0.0665111	0.0410694
Exoc7	-0.357057	-0.244614	0.00641028	0.101922	0.527654	0.531496	0.996475	0.804774
Exoc8	-0.383196	-0.174364	0.259649	0.442672	0.597136	0.704828	0.702487	0.288419
Exosc10	-0.170752	-0.334646	0.112451	-0.0742801	0.704298	0.229852	0.79725	0.796887
Exosc2	-0.0771333	0.673001	-0.675796	0.050033	0.907543	0.0616961	0.175413	0.916137
Exosc3	-0.268141	-0.253315	-0.0900214	-0.100074	0.606959	0.53492	0.891564	0.799268
Exosc4	0.194261	-0.208222	0	-0.411996	0.734185	0.64413	0.996798	0.288472
Exosc5	1.41437	0.763402	NA	0.248024	0.200239	0.182337	NA	0.624662
Exosc7	1.03059	-0.162184	1.15895	-0.0518088	0.0556219	0.714047	0.0178328	0.902121
Exosc8	0.426767	-0.225788	-0.218187	-0.894991	0.308445	0.482931	0.641598	0.000342898
Exosc9	0.236332	-0.187244	0.486749	0.0416476	0.562493	0.520127	0.111457	0.899901
Eya3	-0.0820384	-0.311891	0.592829	0.339887	0.882648	0.28519	0.106304	0.206186
Ezh1	-0.438275	-0.811079	-0.424479	-0.819548	0.466626	0.031897	0.462156	0.0138143
Ezh2	-0.150608	-0.342209	-0.113631	-0.328424	0.696697	0.127358	0.734976	0.112412
Ezr	0.181232	-0.0962827	0.74305	0.442522	0.685587	0.726576	0.0107977	0.0395661
F2r	-0.409914	0.294893	NA	-0.160102	0.616013	0.61756	NA	0.758311
Fabp5	-0.144762	0.329304	0.0379926	0.488613	0.679187	0.180724	0.906496	0.0337624
Fads1	-0.421886	0.236549	NA	0.188425	0.510039	0.606432	NA	0.62823
Faf1	-0.278336	-0.0507525	0.672946	0.877951	0.519293	0.867125	0.0239982	3.07469e-05
Faf2	0.771084	0.658399	0.164732	0.0282395	0.141281	0.0617594	0.816157	0.93982
Fahd1	0.615472	0.290982	-0.124067	-0.471627	0.165474	0.429238	0.838727	0.081711
Fahd2a	0.0135429	-0.739305	-0.318947	-1.11311	0.985555	0.118633	0.674492	0.00933595
Fam104a	0.499434	NA	NA	-0.329132	0.610278	NA	NA	0.601869
Fam109b	0.318101	0.430169	-0.15225	-0.0638368	0.47505	0.149083	0.767598	0.830539
Fam111a	0.423084	0.201674	0.422357	0.176985	0.186924	0.374585	0.0885584	0.384557
Fam114a2	0.121727	-0.194945	-0.562448	-0.901229	0.836074	0.666732	0.278688	0.00163039
Fam117a	0.204766	-0.0688414	-0.253115	-0.550336	0.605904	0.818516	0.464716	0.00590286
Fam118b	0.238438	0.373015	NA	-0.412201	0.735323	0.512812	NA	0.364291
Fam120a	-0.208427	-0.342242	0.672637	0.515241	0.610334	0.125491	0.00940446	0.0132799
Fam122a	1.97231	NA	NA	-0.699166	0.0273479	NA	NA	0.11193
Fam126a	-0.116905	0.292795	-0.422038	-0.0359999	0.779993	0.238428	0.159575	0.894271
Fam132b	0.217188	0.00234082	0.0745569	-0.161841	0.789486	0.996614	0.928281	0.752834
Fam133b	0.9543	0.241081	NA	-0.986028	0.0667822	0.663524	NA	0.00302411
Fam134a	0.773019	-0.35695	0.937081	-0.215081	0.0715345	0.207573	0.0111191	0.422835
Fam134c	0.00234067	0.561401	-0.70504	-0.168202	0.99528	0.046773	0.0595779	0.52431
Fam13b	-0.163472	-0.834518	NA	-1.30866	0.823676	0.0791817	NA	0.000191296
Fam160b1	0.174925	-0.864823	1.12773	0.0695356	0.865377	0.0419637	0.144445	0.907173
Fam162a	1.0857	1.79212	NA	0.0161442	0.0207694	5.55223e-07	NA	0.975561
Fam172a	1.43216	NA	NA	-0.185004	0.223818	NA	NA	0.773883
Fam173a	0.507185	-0.125457	0.235011	-0.421123	0.317693	0.779586	0.690469	0.200444
Fam175b	0.614844	NA	NA	-1.30301	0.591103	NA	NA	0.115974
Fam178a	-0.3748	-0.628802	-0.0835753	-0.359167	0.577734	0.137187	0.924616	0.374201
Fam188a	0.296724	0.229578	0.639569	0.549872	0.694452	0.62904	0.356872	0.143949
Fam192a	0.167884	-0.143986	-0.190935	-0.525158	0.777403	0.761693	0.767598	0.105344
Fam193a	-0.665679	-0.771586	-0.00793161	-0.137335	0.121119	0.00940673	0.99307	0.691106
Fam207a	0.322941	-0.0384244	NA	-0.58341	0.659791	0.961715	NA	0.139236
Fam208a	-1.04092	0.0332651	-0.161691	0.893518	0.0215499	0.938604	0.769417	0.00201773
Fam210a	-0.545355	-0.561415	NA	-1.11697	0.326283	0.275974	NA	0.00255944
Fam210b	0.621646	1.11235	-0.945727	-0.478433	0.010377	5.06626e-14	3.94558e-08	0.000258609
Fam212a	0.191488	-0.194553	-0.142041	-0.550489	0.732698	0.664854	0.829513	0.0718898
Fam213a	0.116812	0.511556	-0.852643	-0.481214	0.76963	0.0185024	0.000427417	0.0123977
Fam214b	-0.65143	0.591076	-0.271932	0.94828	0.240472	0.0907472	0.657911	0.00122574
Fam220a	-0.550546	1.52788	NA	0.307249	0.438099	0.00987512	NA	0.494397
Fam32a	0.711165	-1.29177	-0.505296	-2.53011	0.123717	0.00264413	0.363662	2.75792e-18
Fam45a	0.947179	0.112978	NA	-0.534399	0.163729	0.844313	NA	0.147212
Fam46c	-1.01635	0.860163	-1.93893	-0.0857629	3.89554e-07	1.13445e-11	1.83364e-17	0.560502
Fam49b	1.29951	-0.484295	NA	-0.729834	0.10928	0.368537	NA	0.0725129
Fam50a	-0.130729	-0.420934	-0.435557	-0.749681	0.789249	0.194156	0.272661	0.00424819
Fam53b	-0.254398	-0.913076	-0.325514	-1.00737	0.512522	0.000279696	0.311825	2.67753e-06
Fam63b	0.694155	0.828999	-0.0490063	0.0638093	0.171098	0.0128195	0.948569	0.852343
Fam76a	1.28781	0.70508	NA	-0.394313	0.0284848	0.1058	NA	0.249099
Fam76b	1.17028	0.260814	NA	-0.503948	0.233878	0.699657	NA	0.268575
Fam78a	0.434552	-0.340116	NA	0.270192	0.65668	0.505313	NA	0.558778
Fam83d	-0.00102078	1.12954	-0.399686	0.706186	0.997653	0.000332753	0.455057	0.011828
Fam83g	-1.08122	0.103347	-0.325314	0.835886	0.00868452	0.787259	0.467511	0.00177281
Fam89b	0.288279	-0.0823232	-0.216946	-0.60988	0.56683	0.865678	0.714004	0.030164
Fam96a	-2.02901	-0.467995	-1.40205	0.135412	1.23299e-07	0.276123	6.31916e-05	0.770513
Fam96b	1.05862	0.0179951	NA	-1.08006	0.0552008	0.978783	NA	0.000723874
Fam98a	0.111164	-0.52464	0.521778	-0.135927	0.848999	0.121993	0.248483	0.703114
Fam98b	0.0333985	-0.293888	0.220031	-0.148068	0.950705	0.566133	0.784635	0.762853
Fanca	-0.943605	0.0472461	-0.342959	0.625852	0.0214569	0.902956	0.414873	0.0215658
Fancc	0.183277	0.0723798	NA	-0.13337	0.864922	0.912861	NA	0.80953
Fancd2	-1.05342	-0.579176	-0.539119	-0.0888888	0.00182416	0.0195133	0.0641475	0.761525
Fanci	-1.03405	0.0748955	-0.750842	0.334782	0.00307501	0.825457	0.0154266	0.188524
Fancl	-0.408806	0.0997482	-0.537022	-0.0495942	0.33703	0.798966	0.161731	0.892929
Fancm	-1.18813	-0.626077	-0.483591	0.0561743	0.00901751	0.0700171	0.279092	0.898158
Far1	0.881955	0.450586	0.589083	0.134773	0.046013	0.158357	0.204346	0.649348
Fars2	-0.312461	0.410746	NA	-0.204127	0.60095	0.350661	NA	0.581296
Farsa	0.0783687	0.0445625	0.0947479	0.0371052	0.855437	0.87707	0.800977	0.887767
Farsb	-0.072795	-0.0058894	0.166868	0.210183	0.868025	0.987705	0.611694	0.369089
Fau	0.459359	0.705711	-0.00640876	0.216922	0.242537	0.0067069	0.994438	0.392731
Fbl	0.557601	NA	NA	-0.467556	0.56683	NA	NA	0.404765
Fbxl15	0.228418	0.176515	NA	0.424296	0.802124	0.764277	NA	0.341671
Fbxl19	-1.06235	0.902696	-2.30588	-0.362306	0.02118	0.0545228	8.39502e-07	0.304928
Fbxl3	-0.476964	0.298371	-0.866113	-0.112848	0.246735	0.353175	0.0149609	0.697017
Fbxo11	-0.455915	-0.498408	-0.0422642	-0.107988	0.580081	0.300828	0.971344	0.848797
Fbxo18	-0.734597	NA	NA	-0.930603	0.393235	NA	NA	0.196862
Fbxo28	-0.592205	NA	NA	-0.612052	0.370293	NA	NA	0.240805
Fbxo3	0.0117825	0.336244	-0.285956	0.0150272	0.977562	0.109321	0.272033	0.951432
Fbxo30	-0.830492	0.02969	-0.840544	-0.00392586	0.000663801	0.895789	8.071e-07	0.98428
Fbxo33	-0.569959	-0.0960479	-0.592489	-0.140641	0.317693	0.857058	0.295871	0.732141
Fbxo34	-0.48286	0.236315	-0.664911	0.0314935	0.238741	0.472081	0.0669874	0.923004
Fbxo38	-1.0261	-0.413162	-0.345025	0.244944	0.000970793	0.0755074	0.212757	0.30554
Fbxo42	-0.22555	-0.329826	0.0423066	-0.0849753	0.596538	0.192651	0.924616	0.756381
Fbxo5	0.274598	0.498628	-0.217246	-0.0164047	0.38866	0.00800075	0.398047	0.944306
Fbxo7	0.380979	0.210807	-0.106313	-0.299942	0.298934	0.414701	0.795854	0.155308
Fbxo8	-0.149087	0.554286	NA	-0.251656	0.857927	0.390094	NA	0.582421
Fbxo9	-0.303987	-0.27898	-1.29487	-1.29242	0.409708	0.385195	3.29614e-06	2.22365e-10
Fbxw2	-0.506735	-0.155929	NA	-0.616274	0.346989	0.765589	NA	0.0683649
Fbxw5	0.614744	0.617559	NA	-0.0265352	0.562144	0.374585	NA	0.966482
Fbxw8	0.719362	-0.0889315	1.76241	0.935968	0.307976	0.833752	0.000601922	0.00225452
Fcf1	-0.0267592	-0.608108	-0.254192	-0.856363	0.9633	0.162107	0.600442	0.0283345
Fcho1	-0.57553	-0.555478	-0.315146	-0.317275	0.372713	0.194124	0.657911	0.448139
Fcho2	0.22015	0.0661191	0.003223	-0.172027	0.572618	0.807344	0.991814	0.43495
Fdft1	0.253225	0.793671	-0.4977	0.0187962	0.616548	0.0233057	0.320889	0.960676
Fdps	0.149987	1.14465	0.0511456	1.02351	0.799158	0.000683586	0.941167	0.00022787
Fdxacb1	-0.209033	0.0462158	NA	-0.151631	0.783236	0.936435	NA	0.726165
Fech	-0.288265	0.792596	-0.606059	0.451408	0.217007	8.37222e-07	0.0170507	0.000468092
Fem1b	0.0255841	0.412966	0.312428	0.676528	0.961059	0.146362	0.460983	0.00511887
Fem1c	0.177416	-0.761035	NA	-1.14072	0.830822	0.156451	NA	0.00691053
Fen1	-0.0372867	-0.169863	0.116754	-0.0392066	0.91713	0.386946	0.638915	0.843814
Fermt3	-0.227339	-0.302932	0.119452	0.0202757	0.513843	0.148226	0.68212	0.93627
Fert2	-0.795497	NA	NA	-1.06678	0.272316	NA	NA	0.0738984
Fez2	-0.147238	-0.865632	-0.397024	-1.13741	0.824566	0.0275952	0.478915	0.000529931
Fgd6	-0.0244672	-0.113396	-0.0477556	-0.158349	0.977616	0.809462	0.950037	0.688782
Fgfr1op	0.70432	NA	NA	-1.88034	0.453422	NA	NA	0.0061126
Fgfr1op2	0.814662	0.521635	NA	-0.934658	0.104406	0.246442	NA	0.00167834
Fgfrl1	1.42482	0.0618258	NA	0.584548	0.233878	0.91773	NA	0.237094
Fh1	0.340455	0.0831142	0.338795	0.059653	0.38172	0.78073	0.319642	0.832678
Fhdc1	-1.1131	-0.566876	-0.52232	0.000300056	4.10777e-06	0.00038499	0.0042008	0.997966
Fibp	0.699649	0.247764	NA	-0.0911118	0.488163	0.717407	NA	0.883331
Fig4	-0.0755135	-0.640478	0.397982	-0.189512	0.905434	0.0429051	0.381839	0.576149
Fignl1	-0.427951	0.41881	-0.124008	0.698809	0.111699	0.00950123	0.602438	9.03117e-07
Fip1l1	-0.506603	0.00841954	-0.0679329	0.424791	0.144367	0.981637	0.860991	0.0466846
Fis1	0.160106	0.399371	-1.45886	-1.24287	0.642727	0.124128	2.65299e-10	4.21122e-13
Fkbp15	-1.12967	-0.693762	-0.151853	0.261566	0.0030867	0.0137726	0.736099	0.410344
Fkbp1a	0.96288	NA	NA	-0.470894	0.227057	NA	NA	0.316102
Fkbp2	0.655176	0.304496	-0.509873	-0.879766	0.163138	0.488208	0.338755	0.0088144
Fkbp3	0.859561	0.391742	0.197	-0.290799	0.0461239	0.31013	0.723108	0.421188
Fkbp4	1.11634	-0.01518	1.46895	0.314811	0.00342329	0.962826	3.41562e-06	0.141834
Fkbp8	0.582049	0.215503	0.240841	-0.14853	0.116084	0.441381	0.535472	0.541612
Flii	-0.131466	-0.344766	0.636693	0.40058	0.803544	0.22441	0.0817549	0.11909
Flot1	0.101116	0.253255	NA	-0.256944	0.897361	0.612693	NA	0.517916
Flot2	1.02981	0.485602	1.17953	0.613887	0.155682	0.21256	0.111872	0.0611235
Fmr1	-0.554755	0.537896	-0.919377	0.150167	0.159171	0.0780892	0.00887688	0.594563
Fn3k	-0.135471	-0.243506	-0.612131	-0.743557	0.671125	0.195645	0.000939642	2.74938e-07
Fn3krp	0.112486	0.756993	-0.743424	-0.122455	0.726351	1.72607e-06	2.84616e-05	0.475527
Fnbp4	-0.859492	-1.31745	-0.381249	-0.862407	0.0342028	9.19798e-07	0.338755	0.00131305
Fnip2	-0.785881	-0.458417	0.172809	0.477015	0.0447424	0.078994	0.671456	0.0618084
Fnta	1.22638	0.144836	1.13992	0.032429	0.0498264	0.748069	0.0914951	0.942234
Fntb	-0.789313	NA	NA	-0.859626	0.215565	NA	NA	0.0601674
Fopnl	0.289355	0.752033	-0.409314	0.0294716	0.536001	0.0140324	0.363328	0.930597
Foxm1	0.206152	-0.689767	0.473742	-0.444664	0.747532	0.0544025	0.382221	0.188412
Foxn2	0.634428	-0.543728	1.39614	0.196534	0.562493	0.276123	0.128612	0.751595
Foxo3	-0.770876	0.160887	-0.36434	0.544082	0.00198498	0.376138	0.0623425	0.000142152
Foxo4	-0.209467	0.00462499	NA	-0.419744	0.766962	0.991648	NA	0.242117
Foxred1	0.761346	0.684551	NA	0.301784	0.27226	0.10515	NA	0.450587
Frg1	-0.18463	0.153072	-0.494357	-0.178533	0.65047	0.654517	0.114526	0.558338
Frmd4a	-1.07135	-0.140832	-1.34602	-0.438659	8.24123e-05	0.591006	1.26651e-11	0.0248603
Frmd8	0.108315	-0.243198	0.680268	0.30844	0.905171	0.610182	0.351321	0.484052
Frrs1	-0.183414	0.149829	-0.435009	-0.12349	0.71148	0.693797	0.307738	0.697017
Frs2	-0.0973468	0.155603	NA	-0.177241	0.907543	0.763375	NA	0.678588
Fry	-0.560516	-0.482989	-0.0628862	-0.00720752	0.447259	0.284031	0.945846	0.988761
Fryl	-1.85915	-0.902343	-0.807837	0.125373	2.07304e-18	6.11086e-12	1.90706e-05	0.439501
Fth1	-0.00761499	0.398085	-0.124152	0.257833	0.985555	0.0288615	0.681649	0.0683649
Ftl1	0.0493351	1.18008	-0.0317432	1.07585	0.901123	3.68804e-11	0.928281	6.2587e-12
Fto	-0.406763	0.0382197	-0.202529	0.22285	0.518116	0.944091	0.778946	0.594636
Ftsj1	-0.153221	0.136201	0.12654	0.393402	0.79043	0.72864	0.824036	0.186833
Ftsj3	-0.741986	-0.317321	-0.203028	0.196531	0.057567	0.320368	0.636179	0.540865
Fubp1	-0.168098	-0.596035	0.22405	-0.226366	0.715436	0.0185638	0.551413	0.398506
Fuca2	-0.324405	0.115558	0.319822	0.739122	0.606304	0.774668	0.568967	0.0113213
Fundc2	0.892258	0.465032	0.244885	-0.20483	0.0182687	0.098418	0.590207	0.414464
Fus	-0.3557	-0.105127	-0.107547	0.119168	0.232396	0.626955	0.682817	0.536856
Fxn	0.995875	1.29688	NA	0.453322	0.0907704	0.000632422	NA	0.169589
Fxr1	-0.452258	0.0337429	-0.0733962	0.389836	0.17765	0.905317	0.836184	0.053716
Fxr2	-0.83156	-0.482391	0.264356	0.590578	0.0539724	0.086377	0.533304	0.0309907
Fyttd1	1.07026	NA	NA	-0.573184	0.298934	NA	NA	0.293606
Fzd5	-0.299896	0.186565	0.793038	1.25823	0.617147	0.580675	0.0623425	1.4438e-06
Fzr1	-0.221848	0.210607	-0.544097	-0.135336	0.445115	0.228454	0.00289196	0.414464
G2e3	-0.872292	0.781564	-1.35558	0.274455	0.015188	0.00564825	7.71279e-06	0.304166
G3bp1	-0.0992309	0.869326	-0.0589657	0.886577	0.86173	0.00215605	0.924282	0.000248033
G3bp2	-0.673112	-0.544669	-0.454134	-0.349579	0.0606173	0.0522085	0.175916	0.161125
G6pdx	-0.515226	-0.183143	-0.00723517	0.30077	0.0706312	0.408077	0.98346	0.10675
Gab1	-0.394709	-0.880378	0.504578	-0.00432367	0.385566	0.00106847	0.175567	0.988335
Gabarap	0.310009	-0.278596	-0.467249	-1.07901	0.324143	0.246307	0.05234	2.3252e-10
Gabarapl1	-0.614143	-1.20684	-1.11312	-1.7285	0.190638	0.00247239	0.0085592	1.68928e-08
Gabpa	0.145789	0.0508515	0.522523	0.405885	0.800469	0.900255	0.246089	0.161932
Gabpb1	-0.227018	0.281826	-0.692829	-0.206292	0.645681	0.472081	0.098599	0.525483
Gabpb2	-0.0244535	-0.15381	-0.0258469	-0.17816	0.974671	0.704794	0.974162	0.614764
Gadd45a	-0.478511	0.616826	-2.00994	-0.93766	0.073438	0.0015438	9.82337e-31	4.16378e-10
Gadd45g	0.578414	NA	NA	-2.18972	0.409282	NA	NA	8.33224e-10
Gadd45gip1	0.983998	-0.158188	0.833413	-0.332156	0.00406736	0.581062	0.00513531	0.140806
Gak	-0.668748	-0.139396	-0.325224	0.180819	0.088742	0.681242	0.392278	0.535458
Gale	1.42095	0.274695	NA	-0.664955	0.0121981	0.589747	NA	0.0545715
Galnt1	0.570626	0.297339	0.265323	-0.0315989	0.084422	0.200225	0.396502	0.900277
Galnt10	-0.138024	0.385517	-0.438965	0.0617974	0.774469	0.171002	0.250085	0.828191
Galnt2	0.379919	0.353548	NA	1.01754	0.706613	0.424741	NA	0.00314857
Gan	3.0175	NA	NA	-0.215766	0.0732942	NA	NA	0.737328
Ganab	-0.664123	-0.297851	0.206143	0.549324	0.0456854	0.170551	0.470211	0.00575754
Gapdh	-0.597417	-0.836155	1.76938	1.50854	0.277219	0.00209317	6.66033e-08	4.8269e-07
Gapvd1	-1.13543	-0.469586	-0.5435	0.0985528	9.29161e-07	0.00175189	0.00283331	0.572684
Garem	0.16122	-0.399667	NA	-0.164164	0.854928	0.42721	NA	0.727432
Gars	-0.372399	0.0274381	-0.114446	0.261745	0.21743	0.908989	0.65292	0.168871
Gart	-0.290927	-0.168436	0.245539	0.345024	0.457426	0.53349	0.457341	0.122209
Gata1	0.114554	0.346357	0.0892791	0.297829	0.739475	0.048877	0.741664	0.0679668
Gatad2a	-0.0267508	-0.324389	0.744611	0.423563	0.959304	0.185087	0.0107713	0.060282
Gatad2b	-0.35531	-0.216203	0.245824	0.362365	0.435324	0.525306	0.560339	0.256446
Gatc	1.37345	1.12155	NA	0.204159	0.0963466	0.044654	NA	0.657872
Gba2	-0.974918	-0.0178853	-0.019866	0.913664	0.0109088	0.964625	0.971458	0.000181632
Gbas	0.355321	0.43547	NA	-0.181455	0.665131	0.390094	NA	0.735043
Gbf1	-0.505636	-0.94749	0.413189	-0.0520863	0.293751	0.00160278	0.337576	0.897371
Gcc2	-1.3465	-0.241249	NA	0.177741	0.0139149	0.656773	NA	0.748798
Gcdh	0.573289	-0.320856	0.344682	-0.5723	0.227933	0.357438	0.48684	0.0295753
Gclc	-0.25438	-0.335785	0.196717	0.0923115	0.479609	0.119577	0.494058	0.695639
Gclm	0.318494	1.05847	-0.528444	0.187933	0.228295	6.66142e-14	0.0038269	0.199483
Gcn1l1	-2.10416	-0.492489	-0.812012	0.775695	1.53849e-13	0.0274844	0.000143106	0.000303999
Gcnt1	-0.42215	0.106897	-0.926554	-0.420279	0.327314	0.779586	0.0103605	0.121879
Gdap2	-0.0200595	NA	NA	-0.517509	0.992525	NA	NA	0.31503
Gde1	2.78467	0.736149	NA	-0.128868	0.00157575	0.142009	NA	0.758311
Gdi1	-0.548837	-0.205827	-0.643985	-0.324611	0.184087	0.531496	0.0782839	0.219461
Gdi2	0.769169	0.698374	0.790422	0.697115	0.0370069	0.00144808	0.0126733	0.000346882
Gemin2	0.574621	NA	NA	-1.97609	0.370511	NA	NA	7.34164e-07
Gemin4	1.21647	0.673374	NA	0.0477217	0.272837	0.374585	NA	0.955141
Gemin5	-0.672895	-0.0653186	-0.30233	0.278573	0.163194	0.883146	0.536207	0.428969
Gemin6	0.504676	NA	NA	-5.40744	0.614104	NA	NA	0.00292769
Gemin7	0.687174	0.574107	NA	0.634913	0.367876	0.173616	NA	0.0679781
Gen1	-0.411211	-0.0597178	-0.0672831	0.261068	0.320405	0.866115	0.898124	0.327593
Get4	1.3105	0.79972	0.47523	-0.0583444	0.000697357	0.00323666	0.290926	0.83386
Gfap	-0.0459011	0.449315	-1.75602	-1.28358	0.929324	0.271428	2.00754e-06	1.37379e-07
Gfi1b	0.23346	0.0721928	0.0764997	-0.107905	0.539221	0.799033	0.845925	0.651078
Gfm1	-0.102184	0.0119918	0.453806	0.546252	0.847224	0.98033	0.238521	0.0343944
Gfm2	-1.18264	-0.189182	-0.734674	0.235719	0.00535992	0.640485	0.0735609	0.502209
Gfpt1	-0.291707	-0.821836	0.854845	0.304013	0.805775	0.0739268	0.339411	0.599882
Gga1	0.425898	-0.152609	1.06017	0.461855	0.603248	0.748069	0.112846	0.224084
Gga2	-0.488356	-0.120075	0.333368	0.678809	0.27018	0.713005	0.398047	0.00609936
Gga3	-0.539588	-0.525002	NA	-0.253544	0.479609	0.300689	NA	0.631241
Ggnbp2	-0.139086	-0.935266	0.505929	-0.313498	0.706854	1.02442e-07	0.0178986	0.112599
Ghitm	-0.227733	0.286071	-0.559454	-0.0688683	0.404657	0.0689687	0.0019409	0.677894
Gid8	0.3216	-0.029394	-0.371387	-0.745811	0.254374	0.905317	0.0680413	2.28269e-07
Gigyf2	-1.2478	-0.748156	-0.697782	-0.221389	8.24123e-05	0.00209317	0.00753292	0.414464
Gin1	0.0143244	-0.39759	NA	-0.484037	0.983883	0.484327	NA	0.305238
Ginm1	2.94122	0.644005	NA	-0.011497	0.0138486	0.288777	NA	0.981462
Gins1	0.298576	-0.384869	-0.185312	-0.8924	0.472273	0.201471	0.679098	0.000117242
Gins2	0.345086	0.507427	-0.284485	-0.145047	0.546652	0.206481	0.678916	0.687355
Gins3	0.0879451	NA	NA	-0.388763	0.929103	NA	NA	0.521949
Gins4	1.5788	-0.309988	1.37359	-0.537715	2.00025e-05	0.257976	4.88124e-05	0.0127956
Git2	-0.385947	-0.0964572	0.395699	0.663967	0.562493	0.82542	0.474581	0.0430839
Gle1	0.180118	-0.250199	0.185176	-0.267067	0.77616	0.564441	0.777486	0.460191
Glg1	-0.835523	-0.511683	0.376304	0.676343	0.0106759	0.0215852	0.14691	0.00198843
Glipr2	1.43231	1.09747	NA	-0.265262	0.0562802	0.0177961	NA	0.556442
Glo1	-0.308532	0.623955	-1.70324	-0.794366	0.358349	0.0223561	3.77116e-12	7.59844e-05
Glod4	0.486375	0.323639	0.56159	0.377726	0.346989	0.421809	0.245438	0.301217
Glrx2	1.22559	0.344866	NA	-0.250688	0.0544573	0.4867	NA	0.541612
Glrx5	0.170012	0.738341	-1.03703	-0.492338	0.547914	5.05385e-07	6.46845e-10	0.000137998
Gls	-0.473119	0.317657	-0.0327674	0.735147	0.401145	0.389199	0.96607	0.0134483
Glt25d1	-0.420819	-0.322867	NA	-0.0725424	0.597799	0.562405	NA	0.904946
Gltp	0.868364	2.47307	NA	0.531425	0.385692	0.000826512	NA	0.235493
Gltscr1l	-0.881704	-0.450581	-0.352104	0.0579746	0.177419	0.365241	0.630912	0.923247
Gltscr2	-0.257262	-0.0716718	0.126204	0.288661	0.522591	0.807139	0.736099	0.216698
Glul	-0.225632	0.668732	-0.614572	0.256729	0.59652	0.0097341	0.0675856	0.292858
Glyr1	-0.263861	0.273443	-0.0168333	0.498312	0.692597	0.493246	0.988776	0.120438
Gm15800	-1.6316	-1.05859	-1.00717	-0.457791	1.18999e-14	7.19942e-16	3.78677e-08	0.000819896
Gm16515	0.944406	0.329061	NA	-0.614416	0.108753	0.51482	NA	0.0625384
Gm166	0.172571	NA	NA	-1.37496	0.842433	NA	NA	0.00137167
Gm867	0.16545	0.597489	-2.04479	-1.63708	0.63972	0.0264775	1.00633e-16	8.4121e-21
Gmeb1	0.167119	-0.224028	0.584621	0.171585	0.802124	0.592981	0.295438	0.641397
Gmeb2	-0.231356	-0.0754705	-0.434967	-0.301699	0.652619	0.862495	0.345277	0.312979
Gmfb	1.03239	0.773229	NA	-0.275036	0.104169	0.135979	NA	0.494342
Gmnn	0.622047	-0.044456	-0.512795	-1.2026	0.0382153	0.887821	0.0595779	3.93949e-12
Gmppa	-0.0782074	-0.00570519	NA	0.238435	0.950449	0.996774	NA	0.696791
Gmppb	0.773319	-0.802099	0.706486	-0.887313	0.18701	0.0605377	0.271109	0.0211075
Gmpr	-0.0535161	0.0801482	-0.00228151	0.108373	0.861931	0.637042	0.998973	0.45965
Gmpr2	0.297679	-0.302792	0.358252	-0.268577	0.63816	0.506839	0.585523	0.516717
Gmps	-0.215666	0.315158	-0.0377964	0.469856	0.583195	0.198162	0.928553	0.0237993
Gna13	1.27079	0.783823	1.0572	0.548517	0.0418189	0.0265078	0.127985	0.0791843
Gnai2	0.518555	0.346965	0.611416	0.417112	0.172646	0.153259	0.0616046	0.0438658
Gnai3	1.55552	-0.715301	1.36951	-0.922974	0.00485586	0.0419531	0.01431	0.00146403
Gnas	0.0943549	0.94785	-0.440163	0.389909	0.771023	9.10495e-12	0.0201782	0.00386961
Gnb1	1.19524	0.0291654	1.76494	0.577303	0.0106846	0.93459	3.60942e-06	0.015063
Gnb2	0.615991	0.320265	0.740395	0.421945	0.0630205	0.122867	0.00307382	0.0203462
Gnb2l1	1.01303	0.641149	1.51051	1.1154	2.66232e-05	1.07144e-06	8.21696e-19	5.16084e-21
Gng5	1.69755	0.856226	NA	0.147348	0.0126181	0.0541234	NA	0.730588
Gnl2	-0.572761	-0.490415	0.146573	0.206244	0.150741	0.0760156	0.729247	0.50257
Gnl3	-0.424824	-0.728606	-0.634268	-0.963096	0.344166	0.0333909	0.114114	0.00137167
Gnl3l	-0.594165	0.235904	-0.240977	0.565202	0.137088	0.441189	0.554085	0.0220178
Gnpda1	2.15961	1.51892	NA	0.483353	0.0915484	0.023051	NA	0.340653
Golga2	-0.481746	-0.664019	0.0991524	-0.106367	0.202145	0.00437283	0.805529	0.694875
Golga3	-0.256347	-0.354261	0.00330063	-0.116657	0.702082	0.393307	0.994688	0.774703
Golga4	-0.516065	-0.381436	-0.0726869	0.0368475	0.298934	0.267634	0.908319	0.929391
Golga5	0.148475	0.598016	NA	0.139588	0.857461	0.225063	NA	0.758311
Golgb1	-1.37313	-1.01997	-1.3824	-1.05249	5.50637e-06	8.82391e-05	8.31544e-09	4.5157e-06
Golim4	-0.257813	-0.22101	0.314623	0.329782	0.685475	0.555546	0.539852	0.34219
Golm1	1.20605	0.229054	0.708263	-0.290859	0.00493374	0.476018	0.112031	0.25127
Golph3	0.429845	0.548309	0.292637	0.388662	0.35632	0.0587749	0.538958	0.129314
Golph3l	-0.902637	-0.245363	-0.733354	-0.0999994	0.000406192	0.223008	4.21824e-05	0.633737
Gosr1	0.113282	NA	NA	-0.857298	0.891109	NA	NA	0.0543726
Gosr2	0.586114	0.661715	-0.261402	-0.207795	0.231045	0.06083	0.675164	0.507894
Got2	0.901232	-0.459267	1.64143	0.260661	0.0971307	0.166515	5.97753e-05	0.454533
Gpaa1	-0.200172	0.246569	-0.108249	0.315915	0.814479	0.591359	0.917919	0.409714
Gpalpp1	-0.574662	-0.864576	-0.521002	-0.833362	0.226166	0.021957	0.258593	0.0102477
Gpatch11	0.598369	NA	NA	-1.01834	0.611268	NA	NA	0.118573
Gpatch2l	-0.71253	-0.995644	-0.312295	-0.617151	0.301144	0.0276598	0.686712	0.215502
Gpatch8	-0.990892	-1.01044	-0.455044	-0.497572	0.00602032	8.97054e-05	0.169479	0.0643254
Gpbp1	-0.368581	0.488382	0.225234	1.0604	0.643076	0.223008	0.784635	0.00154822
Gpc4	0.246734	0.483894	0.508652	0.727724	0.788402	0.374987	0.476456	0.152277
Gpcpd1	-0.407711	0.102255	-0.965184	-0.478749	0.141747	0.640141	4.51416e-08	0.00173231
Gpd2	0.161362	-0.045299	NA	-0.041586	0.848999	0.94615	NA	0.940684
Gpi1	-0.146934	0.882899	0.42118	1.42902	0.830841	0.00308709	0.406252	9.09642e-08
Gpkow	0.0357159	-0.22757	NA	-0.499194	0.957678	0.670236	NA	0.194663
Gpn2	1.48129	NA	NA	-0.24918	0.205807	NA	NA	0.711022
Gpn3	0.269653	-0.0168563	0.319387	0.00833736	0.596963	0.97011	0.493606	0.982913
Gpr107	-0.446985	0.46164	NA	0.609832	0.591393	0.338882	NA	0.137177
Gpr108	1.46819	NA	NA	-1.46177	0.0920349	NA	NA	0.000426205
Gpr146	-0.423461	0.991273	-1.27365	0.117948	0.32228	0.000648109	0.000379392	0.685139
Gpr150	0.348951	1.08632	NA	0.0240896	0.636778	0.0860426	NA	0.963615
Gpr155	0.361992	-0.609599	0.972715	-0.021075	0.549781	0.0757561	0.0348793	0.959966
Gpr56	-0.0162503	0.137973	0.566675	0.697854	0.971314	0.524707	0.0126278	3.12085e-05
Gps1	-0.736588	-0.165728	-0.104737	0.440048	0.222576	0.737407	0.901503	0.267881
Gps2	0.988049	0.554794	0.358	-0.0983647	0.0105642	0.0365643	0.411036	0.711004
Gpsm2	-0.03684	-0.147263	0.215648	0.0817457	0.933055	0.560105	0.464716	0.735043
Gpx1	-0.469707	0.781342	-1.2445	-0.016896	0.029906	0.000255498	0.00204785	0.929971
Gpx4	-0.462268	1.21618	-0.901698	0.753337	0.0859187	5.0978e-15	2.67272e-07	1.17534e-07
Grap2	-0.560648	-0.360452	-1.81339	-1.63519	0.178793	0.357444	9.50439e-08	5.37623e-10
Grb10	-0.692304	0.451989	-0.0238771	1.09492	0.0805064	0.047925	0.953894	6.74156e-06
Grcc10	1.56736	1.66192	NA	-0.781511	0.0454635	0.0123401	NA	0.0612292
Grhpr	0.125559	-0.0923848	0.0528477	-0.180882	0.844843	0.833752	0.928619	0.637349
Grina	0.159697	0.433832	-0.0551414	0.19558	0.635088	0.0123373	0.861228	0.25384
Gripap1	-0.771193	-0.385582	-0.928331	-0.565484	0.0497226	0.252733	0.00791151	0.0377212
Grk6	0.0867003	0.737204	0.139426	0.768042	0.887724	0.0156956	0.813983	0.00349007
Grn	-0.326358	-0.454474	NA	0.459866	0.711252	0.300718	NA	0.227542
Grpel1	1.51589	0.366073	0.177245	-0.995994	4.57633e-06	0.219971	0.71339	2.18326e-06
Grsf1	0.175044	0.0606027	0.572598	0.437251	0.792404	0.892656	0.282586	0.180774
Grtp1	0.393548	1.12185	NA	-0.105316	0.628595	0.104826	NA	0.836686
Gse1	-1.00474	-0.513779	-0.00600884	0.461327	0.00182416	0.0178372	0.991814	0.0314329
Gsg2	0.0872833	-0.144198	0.130591	-0.122349	0.905477	0.776269	0.875507	0.770513
Gsk3a	0.389932	0.362992	0.729913	0.680803	0.403904	0.192426	0.0626005	0.00250617
Gsk3b	-0.629159	1.06506	0.427931	2.10145	0.36256	0.00132496	0.503576	2.22717e-12
Gspt1	-0.238422	-0.179764	0.551158	0.586708	0.547018	0.47391	0.0362772	0.00420904
Gsr	0.127108	0.318458	0.435104	0.603321	0.768206	0.19899	0.172081	0.00225452
Gss	-0.336123	0.123278	-0.618754	-0.182716	0.280152	0.630918	0.00414749	0.38511
Gstm5	0.300168	0.455881	0.0565672	0.188728	0.461647	0.0579727	0.909644	0.419019
Gsto1	1.5938	1.22705	NA	0.192658	0.209478	0.175231	NA	0.75681
Gstp1	-0.265981	-0.361812	-0.455558	-0.57673	0.614104	0.41124	0.36472	0.0903033
Gtf2a1	1.80952	0.544817	1.94448	0.648325	0.0235356	0.181811	0.0297994	0.0683649
Gtf2a2	0.987901	-0.82425	1.13854	-0.696102	0.162563	0.0709758	0.131411	0.0864508
Gtf2b	0.578893	-0.180405	0.347147	-0.436944	0.185547	0.610961	0.441144	0.137822
Gtf2e2	-0.11691	-0.311495	-0.493443	-0.710912	0.778599	0.235511	0.0837565	0.000536898
Gtf2f1	0.194958	-0.272449	0.0927817	-0.397581	0.630094	0.290264	0.818986	0.0640906
Gtf2f2	0.978399	0.208699	0.369604	-0.418612	0.0751289	0.673157	0.633464	0.288059
Gtf2h2	2.35019	0.866891	NA	0.75005	0.106692	0.136646	NA	0.150428
Gtf2h3	-0.0256254	1.61303	NA	-0.163769	0.979297	0.00810671	NA	0.729404
Gtf2h5	0.104016	0.0979165	-1.05869	-1.08662	0.862443	0.861649	0.0373084	0.000395051
Gtf2i	-1.19813	-0.246167	-0.50103	0.428009	0.00364203	0.486572	0.219667	0.169589
Gtf3a	1.64883	0.767483	NA	0.298019	0.0818627	0.163409	NA	0.617966
Gtf3c1	-1.66025	-0.440032	-0.524543	0.672619	4.29219e-08	0.0704164	0.0434241	0.00275006
Gtf3c2	-0.103108	0.0685779	0.588577	0.738051	0.871095	0.849878	0.17346	0.00428425
Gtf3c3	0	0.208632	NA	0.999074	0.993154	0.753579	NA	0.035546
Gtf3c4	-1.38105	-0.605851	-0.20829	0.542865	0.00279251	0.0850562	0.698143	0.119811
Gtf3c5	-0.600333	-0.485429	-0.0686268	0.0198731	0.230748	0.177679	0.91517	0.967946
Gtf3c6	0.297233	-0.452731	NA	-1.34909	0.606056	0.430899	NA	0.000542102
Gtpbp1	0.328406	0.129532	0.466055	0.243854	0.324106	0.572223	0.0500428	0.204755
Gtpbp2	-0.986726	-0.971437	-0.792875	-0.801453	0.00144341	6.52551e-06	0.00117305	8.86332e-05
Gtpbp4	-0.222354	-0.0134712	0.528053	0.712301	0.722623	0.981435	0.262921	0.0344125
Gtse1	-0.674758	-0.777428	-0.202609	-0.32855	0.0295517	0.000209436	0.466792	0.133208
Gucd1	1.29305	0.928112	0.0452708	-0.341927	0.00367721	0.00279964	0.946427	0.184229
Guk1	1.28017	1.6936	NA	0.212942	0.0712381	0.000332804	NA	0.610899
Gusb	-1.42539	-0.997052	-1.15104	-0.746054	6.57989e-06	0.000132437	1.48332e-06	0.00720547
Gypa	0.234834	0.159913	-0.475056	-0.572953	0.324559	0.364627	0.0786478	1.75393e-06
Gypc	0.958603	-0.198235	-0.269337	-1.4496	0.00119351	0.481284	0.409126	1.42729e-16
H13	1.53195	0.80651	NA	0.340325	0.100552	0.0991003	NA	0.415548
H1f0	4.76709	-0.328377	NA	-1.64224	2.38671e-05	0.633903	NA	2.18744e-06
H2-Ke2	0.35627	-1.02253	0.216772	-1.18575	0.402851	0.000487631	0.630164	2.39945e-06
H2-Ke6	1.21958	-0.080737	NA	-0.363558	0.154746	0.905464	NA	0.460696
H2-T23	0.213942	-0.357306	-0.00420113	-0.585733	0.75396	0.353276	0.994688	0.0730834
H2-T24	-0.544662	0.342377	-1.52984	-0.666501	0.079016	0.197582	2.31193e-11	0.000683731
H2afj	0.452421	0.751573	-0.444064	-0.16798	0.221076	0.00296022	0.215988	0.488135
H2afv	1.29321	0.703874	NA	-1.06106	0.0132069	0.0985096	NA	9.46184e-05
H2afx	0.441111	-0.078578	-0.0465322	-0.589644	0.0437439	0.623723	0.910864	5.06145e-07
H2afy	-0.199437	-0.101532	NA	-0.255512	0.865693	0.903437	NA	0.68006
H2afz	1.11606	2.48824	0.34165	1.69291	0.0123174	1.83942e-25	0.531262	1.85869e-17
H3f3b	0.65001	0.0688579	0.242064	-0.362712	0.0329445	0.787259	0.397459	0.0416251
Hace1	-0.722966	0.221163	-0.215212	0.705579	0.0313364	0.366685	0.496707	0.000320005
Hadha	-0.0240374	0.0167268	0.220424	0.237663	0.950026	0.944091	0.329025	0.166684
Hadhb	-0.445193	0.285942	NA	0.514923	0.59058	0.643731	NA	0.329963
Hagh	0.772743	0.260253	0.0170572	-0.518781	0.00936917	0.258062	0.96607	0.00246175
Hars	0.357867	-0.0199677	0.394186	-0.00729954	0.214533	0.931805	0.0518023	0.973055
Hars2	-0.29031	-0.321337	-0.268049	-0.321945	0.697253	0.511874	0.740172	0.441496
Hat1	0.0456316	0.232779	0.17951	0.343773	0.904393	0.240802	0.451993	0.0493788
Haus1	0.336664	0.740376	-0.188446	0.194632	0.505345	0.0264621	0.754688	0.597642
Haus2	1.74226	NA	NA	-1.19053	0.0148265	NA	NA	0.00159069
Haus3	-0.463454	-0.240941	-0.358248	-0.157767	0.333455	0.527993	0.446494	0.644855
Haus4	-0.362444	0.211517	-0.297537	0.254176	0.479594	0.571192	0.562439	0.410344
Haus5	-0.237467	0.051451	0.139224	0.409226	0.700074	0.899409	0.818505	0.197622
Haus6	-0.182791	0.0789307	0.107102	0.345913	0.733289	0.834256	0.844718	0.234533
Haus7	0.0888553	-0.0783857	0.219396	0.027738	0.868566	0.835393	0.649679	0.948312
Haus8	0.193277	-0.24683	0.189133	-0.273914	0.685616	0.451524	0.690941	0.304775
Hax1	-0.895509	1.05398	NA	1.01371	0.123591	0.0147332	NA	0.0143518
Hba-x	-1.06088	-0.195141	-0.19449	0.647377	7.02228e-06	0.204969	0.367951	9.27177e-07
Hbb-bh1	-1.07246	-0.587131	-1.07909	-0.617061	1.39459e-07	1.46401e-05	3.64582e-07	7.03734e-07
Hbb-y	-1.27284	-0.378597	-0.31129	0.559375	1.18994e-10	0.00885707	0.358885	3.77235e-06
Hbp1	-1.05029	0.0364256	-1.15659	-0.0934669	0.000347067	0.903332	1.57215e-07	0.701315
Hbq1b	-0.335259	0.515589	-0.85223	-0.0249564	0.359915	0.0478254	0.00249046	0.932997
Hbs1l	-0.235835	-0.151565	0.18235	0.243521	0.595302	0.617374	0.656387	0.33904
Hccs	2.62519	NA	NA	-2.39133	0.0261191	NA	NA	0.00193205
Hcfc1	-1.30149	-0.587854	-0.144858	0.545319	2.59242e-08	7.9966e-05	0.523683	0.000255008
Hdac1	-0.678868	0.469241	-0.492036	0.634043	0.174657	0.213013	0.338755	0.0344089
Hdac11	0.4374	-0.141882	0.0602152	-0.542118	0.504646	0.779586	0.944053	0.101877
Hdac2	0.66736	0.269244	0.743045	0.322237	0.159348	0.41124	0.0840081	0.237915
Hdac3	0.995671	-0.0300346	NA	0.0260324	0.269167	0.962512	NA	0.959932
Hdac6	-1.40854	-1.14222	-0.208263	0.0289512	0.00250143	0.000759607	0.69924	0.948229
Hdgf	0.497034	0.135783	0.235941	-0.149062	0.106473	0.576207	0.378958	0.475008
Hdgfrp2	-0.0245203	-0.149842	0.514454	0.365971	0.970911	0.655551	0.218367	0.178415
Hdhd2	1.14289	-0.837173	1.45199	-0.556802	0.108415	0.0630595	0.048588	0.217018
Hdlbp	-0.992885	-0.32741	0.0613967	0.703321	0.000267497	0.0873946	0.831912	6.61929e-05
Heatr1	-1.90129	-0.460389	-0.518868	0.892535	2.34232e-05	0.248526	0.250086	0.0151728
Heatr3	-0.522412	0.755722	NA	1.25092	0.548071	0.0817889	NA	0.000661301
Heatr5a	-1.52622	-0.182033	-0.461163	0.860003	5.0162e-05	0.597079	0.224385	0.00124684
Heatr5b	-1.67131	-0.33125	-0.387513	0.92903	0.000185751	0.39562	0.402045	0.00551647
Hebp1	0.269908	-0.259474	-0.138232	-0.691166	0.311872	0.106601	0.546486	5.72129e-08
Hectd1	-1.44816	-0.797719	-0.398504	0.228355	2.16502e-10	9.59987e-09	0.0398964	0.156483
Hectd3	-0.462193	0.0380597	-0.124691	0.352105	0.280636	0.915865	0.803611	0.166684
Helb	-1.49957	-0.327652	-0.54041	0.608281	2.56628e-07	0.149166	0.0195788	0.00345159
Hells	0.0361095	0.589888	0.0868369	0.616876	0.950216	0.0560981	0.885992	0.0371817
Helq	1.37679	0.192495	NA	0.0599012	0.198413	0.763375	NA	0.922746
Helz	-1.46424	-0.502274	-0.769249	0.168943	0.00285286	0.223008	0.0927921	0.716366
Hemgn	-0.824134	-0.238558	-0.619518	-0.0572575	3.88825e-05	0.120762	0.0650371	0.714728
Herc1	-1.74582	-0.90369	-0.891712	-0.073259	1.17472e-16	7.0723e-12	1.65534e-06	0.66457
Herc2	-1.88914	-1.08463	-0.918643	-0.137943	2.4085e-14	1.52892e-09	1.83965e-07	0.543623
Herc4	0.130091	-0.203703	0.826327	0.470637	0.824566	0.512827	0.0374791	0.0725413
Herpud1	0.268905	-0.472576	-0.549809	-1.31309	0.630094	0.177473	0.248217	3.77154e-06
Hexim1	-0.247243	-0.0362735	-0.467675	-0.279877	0.566745	0.919495	0.175656	0.26119
Hgs	-0.254383	-0.0332481	-0.171079	0.0268377	0.598248	0.934447	0.735808	0.936239
Hiatl1	-0.105913	0.620194	0.174443	0.879865	0.887724	0.080754	0.798927	0.00366581
Hibadh	1.41255	2.26752	NA	0.0163847	0.0994595	0.000339138	NA	0.978717
Hibch	0.275327	1.88125	NA	0.816388	0.81636	0.010477	NA	0.186512
Hif1a	0.37639	0.0175323	1.11016	0.730726	0.601527	0.981864	0.0490575	0.0438658
Hif1an	0.553461	-0.26454	NA	-0.350607	0.507247	0.67388	NA	0.470109
Hif3a	0.00480055	0.667292	-0.00136015	0.64205	0.992978	0.0260692	0.998973	0.0170564
Higd1a	1.52213	NA	NA	0.0281415	0.188582	NA	NA	0.968714
Higd2a	0.439099	-0.187338	-0.426199	-1.07546	0.335237	0.65817	0.368868	4.12646e-05
Hinfp	0.00234203	-0.443368	NA	-0.698377	0.993614	0.486071	NA	0.135407
Hint1	1.67999	0.508732	0.613428	-0.5803	8.65313e-06	0.0916509	0.171319	0.00840198
Hint2	1.23761	1.60498	NA	0.159632	0.161713	0.00498195	NA	0.774354
Hipk1	-0.699931	0.203593	-0.267712	0.612324	0.0154765	0.333868	0.255597	0.000357082
Hipk2	-0.548418	-0.117802	0.435869	0.84316	0.146207	0.668907	0.151132	4.73905e-05
Hipk3	-0.313128	-0.164071	0.239518	0.366271	0.546664	0.652579	0.629288	0.211196
Hirip3	-0.201011	-0.470117	0.0135387	-0.275721	0.642987	0.0740809	0.975245	0.264956
Hist1h1a	-1.51122	-2.14448	-0.254785	-0.914436	0.000721869	0.000219451	0.800721	0.0592748
Hist1h1b	-0.812387	-1.78068	-0.883492	-1.8769	0.0881268	5.45797e-07	0.20686	6.10082e-09
Hist1h1c	0.721181	-1.37695	-0.124413	-2.24582	0.000392189	2.68664e-30	0.805963	6.35482e-75
Hist1h1d	-0.375378	-2.39399	-0.15591	-2.19843	0.459261	2.6868e-14	0.844749	2.15225e-14
Hist1h1e	0.746089	NA	0.844508	-0.709215	0.33703	NA	0.615268	0.191698
Hist1h3g	0.970772	NA	0.553938	NA	0.347537	NA	0.801912	NA
Hist1h4i	0.900244	0.888603	-1.0882	-1.12315	0.0101423	0.0030676	0.00292777	2.54102e-06
Hist2h2bb	-1.28746	-2.89412	0.140104	-1.49818	0.0345043	1.53863e-09	0.995492	0.000472588
Hist2h2be	0.212128	NA	NA	-0.381236	0.841991	NA	NA	0.513641
Hist3h2a	-0.325623	-0.958383	-0.849529	-1.50553	0.305685	1.16224e-05	0.00348041	3.98343e-13
Hist3h2ba	2.15811	0.00582383	1.002	-1.15705	0.00018905	0.984451	0.268547	0.00960323
Hjurp	1.08619	0.426805	0.122005	-0.565111	0.0551341	0.289426	0.899542	0.0789386
Hk1	-0.833379	-0.71931	0.228154	0.318713	0.00284739	3.89789e-05	0.31573	0.100409
Hltf	-0.273673	0.269517	0.392516	0.914757	0.702162	0.520689	0.507433	0.00755449
Hmbs	-0.850657	-0.111395	-0.921951	-0.206454	2.00025e-05	0.524719	0.0177057	0.12659
Hmces	1.11265	-0.135318	NA	-0.172268	0.237153	0.831831	NA	0.738894
Hmg20a	-0.434206	-0.0360567	-1.11444	-0.742043	0.409282	0.948338	0.0141991	0.0287321
Hmg20b	1.37143	0.914365	NA	0.393481	0.11131	0.0357531	NA	0.295376
Hmgb1	1.91076	1.70054	-0.187832	-0.421329	1.54407e-06	1.90058e-07	0.782435	0.139211
Hmgb2	0.453932	-0.42196	-0.915944	-1.81562	0.0874487	0.0390557	2.79067e-07	1.99896e-35
Hmgb3	0.312559	-0.442346	-0.487151	-1.26408	0.535821	0.297452	0.326815	1.89813e-05
Hmgcl	-0.561315	-0.0643057	-0.433317	0.0389286	0.218917	0.87707	0.330245	0.920993
Hmgcr	-0.529954	-0.197271	-0.0850445	0.224297	0.159348	0.490505	0.843881	0.382708
Hmgcs1	0.645855	-0.10304	NA	0.681233	0.572622	0.865678	NA	0.134001
Hmgn2	-0.167562	-0.612031	-1.17102	-1.63885	0.675893	0.0542512	0.000125187	1.08733e-14
Hmgn5	-0.814467	NA	NA	-0.667082	0.22331	NA	NA	0.398281
Hmgxb4	0.865663	NA	NA	-1.36188	0.323028	NA	NA	0.0142071
Hmmr	-0.409369	-0.552864	-0.300532	-0.467416	0.110753	0.000384211	0.13764	0.00147538
Hmox2	0.637786	NA	NA	-0.855032	0.426766	NA	NA	0.0725129
Hn1	0.397163	0.234338	-1.04757	-1.23348	0.22744	0.463934	0.000168236	3.85986e-11
Hn1l	0.949573	1.19703	NA	-0.319948	0.202465	0.09093	NA	0.478663
Hnrnpa0	0.695828	0.573301	0.965805	0.820896	0.101094	0.0140324	0.00674138	5.3858e-05
Hnrnpa1	-0.412172	-1.17749	-0.715648	-1.50055	0.343933	8.19666e-05	0.098599	4.47965e-08
Hnrnpa2b1	0.114777	-0.235972	-0.31507	-0.68913	0.685319	0.112903	0.143774	7.80874e-09
Hnrnpa3	0.257996	-0.0919905	0.111364	-0.258371	0.460523	0.780451	0.771517	0.35348
Hnrnpab	0.585916	-0.025487	0.0586476	-0.576567	0.0276103	0.916241	0.839287	0.00010454
Hnrnpc	-0.00672853	-0.641247	0.11047	-0.549457	0.99528	0.00625987	0.760108	0.0114838
Hnrnpd	0.200728	-0.513687	0.183488	-0.554529	0.531272	0.00403325	0.436708	0.000508034
Hnrnpdl	-0.215493	-0.292302	-0.98343	-1.08349	0.605259	0.364456	0.00177828	4.26295e-07
Hnrnph1	0.165263	-0.382824	0.19416	-0.377468	0.63429	0.0469262	0.451328	0.0327221
Hnrnph2	-0.88244	-0.109006	-0.462652	0.287367	0.0116177	0.741575	0.150122	0.276185
Hnrnph3	0.988304	-0.150561	0.939417	-0.193591	0.140724	0.785768	0.170914	0.697761
Hnrnpk	0.321074	0.638601	-0.0076166	0.286465	0.268967	8.92724e-05	0.983141	0.0703258
Hnrnpl	-0.122336	0.149282	0.053177	0.301171	0.696697	0.399669	0.847289	0.0406302
Hnrnpll	0.0297829	-0.390963	0.478882	0.0353021	0.956106	0.178682	0.241119	0.916907
Hnrnpm	-0.32665	-0.615529	0.0086606	-0.303631	0.259713	0.000120741	0.978891	0.064703
Hnrnpr	-0.22723	0.55458	-0.383003	0.375713	0.623106	0.0428052	0.361596	0.106277
Hnrnpu	-0.607787	-0.462809	0.243001	0.364685	0.00825256	0.000555408	0.295438	0.00511887
Hnrnpul1	-0.038356	-0.369889	0.448854	0.0945615	0.922555	0.0524487	0.0392747	0.657524
Hnrnpul2	-0.971235	-0.478721	0.0591493	0.528196	0.00010849	0.00280572	0.826852	0.000798074
Hook3	-0.31458	-0.212975	0.00222221	0.0861291	0.588461	0.601587	0.998641	0.836686
Hp1bp3	0.0028804	-0.92324	0.141379	-0.807772	0.99528	9.67724e-05	0.730989	0.000223807
Hprt	0.299689	0.381301	-0.500661	-0.442569	0.323747	0.0641192	0.0205879	0.00863574
Hras	1.05833	0.589591	NA	-0.287909	0.114384	0.24931	NA	0.449717
Hrsp12	1.64887	NA	NA	-1.02744	0.0487465	NA	NA	0.0444055
Hs6st1	0.43162	-0.342078	1.01334	0.217756	0.396159	0.267678	0.0118167	0.451882
Hsbp1	0.663876	NA	NA	-1.14817	0.361182	NA	NA	0.00578201
Hscb	-0.134343	0.782279	-1.33674	-0.443951	0.745788	0.00201989	1.38046e-06	0.0371286
Hsd17b10	1.97461	0.270726	1.61064	-0.117942	0.00024996	0.486071	0.00664193	0.745805
Hsd17b12	1.74399	NA	NA	0.370934	0.137341	NA	NA	0.614783
Hsd17b4	-0.499643	0.149547	NA	0.39795	0.497127	0.759323	NA	0.318714
Hsd3b1	0.235167	0.931641	NA	0.416981	0.749489	0.0536707	NA	0.397408
Hsd3b6	0.0652389	1.06152	NA	-1.22677	0.923735	0.118361	NA	0.000580008
Hsdl2	0.31639	0.268039	-0.0573471	-0.130514	0.575141	0.528055	0.940423	0.732141
Hsp90aa1	0.315422	0.802162	0.387873	0.851495	0.303318	6.22619e-08	0.0775261	8.43881e-11
Hsp90ab1	-0.237977	-0.320738	0.643311	0.537076	0.382205	0.0217704	0.000421338	7.65656e-06
Hsp90b1	-0.379528	-0.221369	0.00988829	0.14468	0.169266	0.232883	0.975391	0.432553
Hspa13	0.554267	0.508086	NA	-0.012262	0.44422	0.311461	NA	0.977685
Hspa14	0.372929	-0.0953163	0.23931	-0.252455	0.364288	0.772829	0.563507	0.303788
Hspa4	-0.26317	0.335385	0.375592	0.951274	0.488975	0.118776	0.171844	2.69607e-07
Hspa4l	-0.447691	0.0720096	-0.0544715	0.441824	0.174129	0.780451	0.886479	0.0157904
Hspa5	-0.871072	-0.083749	-0.92559	-0.161867	6.96464e-05	0.633835	2.67272e-07	0.270285
Hspa8	0.388398	0.550242	0.578233	0.717209	0.295358	0.00402925	0.042587	2.09189e-05
Hspa9	-0.530412	-0.24974	0.231746	0.489087	0.190638	0.356875	0.531479	0.0406051
Hspbap1	-1.10806	-1.10575	-0.851688	-0.872696	0.00390855	0.000845756	0.0181339	0.00416918
Hspbp1	0.147423	0.791438	0.273934	0.894572	0.811558	0.0167757	0.63821	0.00146403
Hspd1	0.612902	0.206144	0.673662	0.24482	0.163036	0.501478	0.090185	0.340808
Hspe1	0.452634	NA	NA	-1.12738	0.493571	NA	NA	0.00219029
Hsph1	-0.534332	-0.0806917	-0.128351	0.302609	0.135465	0.761918	0.759651	0.0900999
Htatip2	-0.313494	0.259485	-1.26	-0.710992	0.354376	0.335629	4.44603e-08	0.000325564
Htatsf1	0.0564321	-0.595495	0.764788	0.0889692	0.92443	0.0627165	0.06835	0.804702
Htra2	0.243306	-0.24209	0.179225	-0.329035	0.573509	0.402845	0.670654	0.15748
Htt	-1.55502	-0.884776	-0.587627	0.0593093	2.56628e-07	8.97054e-05	0.0184165	0.839057
Huwe1	-1.74777	-0.874951	-0.700414	0.148842	6.4766e-13	4.91264e-07	8.57273e-05	0.489201
Hyal2	0.750634	1.4684	NA	-0.0653389	0.376241	0.00931201	NA	0.902522
Hyls1	-0.134437	-0.429509	-0.130621	-0.451972	0.830822	0.273721	0.839111	0.228924
Hyou1	-0.671237	-0.249315	0.69585	1.09523	0.116892	0.3928	0.0434189	3.71209e-06
Hypk	-0.402802	-0.510665	-0.772732	-0.903913	0.155625	0.0158277	3.08498e-05	7.07241e-07
Iah1	1.41771	0.355315	0.626592	-0.457095	0.0219532	0.453549	0.399467	0.291159
Iars	-0.335481	0.177951	0.299154	0.789736	0.326352	0.420078	0.219041	1.6843e-05
Iars2	-0.501093	-0.283901	0.239103	0.433584	0.202465	0.281306	0.498897	0.0682231
Iba57	0.295439	0.194792	0.191626	0.0681607	0.560968	0.573446	0.718642	0.830571
Ibtk	-0.836275	-0.350852	-0.388448	0.0732013	0.0089341	0.122736	0.153755	0.775795
Icam4	0.342471	0.400191	-0.197912	-0.163618	0.213634	0.0145837	0.366658	0.303847
Ict1	2.33484	-0.00450385	NA	-1.28862	8.81374e-06	0.996614	NA	0.000312467
Ide	-0.572309	-0.259944	0.127936	0.417467	0.163138	0.420247	0.784686	0.120597
Idh2	-0.776195	0.341877	NA	0.370444	0.205958	0.455697	NA	0.359858
Idh3a	0.734725	0.257139	0.586983	0.088158	0.0536221	0.350714	0.098599	0.759026
Idh3b	1.35725	0.516682	1.11604	0.252933	0.000238639	0.0286397	0.0011728	0.257732
Idh3g	0.100881	-0.0772418	0.183317	-0.0177289	0.797302	0.763375	0.519816	0.945811
Idnk	1.57935	NA	NA	-1.5748	0.214533	NA	NA	0.0356618
Ier2	-0.136204	0.0342656	NA	-1.44392	0.902601	0.948338	NA	0.00169401
Ier3	-1.72897	0.192109	-1.63029	0.267467	4.58046e-06	0.628055	3.68989e-06	0.393653
[truncated: 3,065 more rows]

## Sheet: c
		mRNA-seq				Ribo-seq
Gene Symbol	Rank	Wt+Fe	Hri-/-+Fe	Wt-Fe	Hri-/--Fe	Wt+Fe	Hri-/-+Fe	Wt-Fe	Hri-/--Fe
Klf1	66	1964.8	1848.4	1706.2	1762.1	2687.8	2181.4	2335	2010.3
Nfe2	97	1380.9	1159.9	1077.5	1269.8	751.9	724.4	733.4	912
Eif2ak1 (Hri)	117	1223.4	1031.2	935.2	1053.3	566.5	461.4	631.6	488.1
Ppp1r15a	120	1222.1	1191.8	997	1451.1	751.4	254.8	278.6	158.1
Zfpm1	121	1212.4	1143.1	1045.8	1039.6	89.6	53.3	128.1	100.5
Bcl2l1	156	989.2	745	619.7	865.8	225.7	137.1	96.4	130.9
Atf4	202	765.1	717	1124.9	729.9	648.2	176.8	466.7	57.7
Gata1	256	618.6	628.7	614.6	600.4	227.7	310	335.3	417.7
Foxo3	380	432.9	340.7	274.4	365.9	277.3	195.3	286.4	433.7
Ppp1r15b	908	176.3	184.4	177.9	165.2	15	20.7	35.7	23.2
Eif2s1	1345	117	132.1	132.2	106	52.3	86.5	87.1	80.8
Nfe2l2	1942	75.7	81.4	70.1	76.8	97	99.8	109	82.7
Ddit3	2016	72	65.5	165	83.7	112.8	10.3	111.5	13.1
Bach1	2478	55.8	52.1	43.3	50.1	15.1	14.3	11.4	9.2
Grb10	3053	41.1	23.3	103.4	23	25.3	12.8	75.4	27.1
Atf5	4213	23.2	13.2	316.4	11.5	1.9	0.9	12.9	1.1
Eif2ak2	4520	19.7	20.2	14.3	21.2	16.3	11.7	7.4	13.7
Trib3	5603	10	1.7	127.2	4.1	0.5	0.3	20.3	0.8
Eif2ak3	6369	5	5.5	6.1	4.9	2.5	2.4	2	2.1
Note:
mRNAs were ranked by the TPM of each mRNA from mRNA-seq data of Wt+Fe EBs. mRNAs of interests with respect to erythropoiesis, translation and ISR were compiled to highlight the abundance of Eif2ak1(HRI), Ppp1r15a and Atf4 mRNAs.
Among the four eIF2a kinases, Eif2ak1(HRI) is most highly expressed in EBs, about 2 orders of the magnitude of Eif2ak2(PKR) and Eif2ak3(PERK). Eif2ak4 (GCN2) was expressed at a level lower than the cut-off.

## Sheet: d
Gene Symbol	Type	Condition	Ribo-seq/mRNA-seq	Atf4/eIF2s1	Atf4/Rps6
Atf4	uORF1	Wt+Fe	10.7	5.7	21.3
		Hri-/-+Fe	11.4	5.1	8
		Wt-Fe	7.2	5	15.4
		Hri-/--Fe	20.3	12.8	13.5
eIF2s1 (eIF2a)	Canonical ORF	Wt+Fe	1.9
		Hri-/-+Fe	2.2
		Wt-Fe	1.4
		Hri-/--Fe	1.6
Rps6	Canonical ORF	Wt+Fe	0.5
		Hri-/-+Fe	1.4
		Wt-Fe	0.5
		Hri-/--Fe	1.5
Note:
To calculate ribosome occupancy at AUG, Ribo-seq reads were normalized with the respective mRNA-seq reads. The AUG of uORF1 in Atf4 mRNA was compared to the AUG of canonical ORFs of eIF2s1 (eIF2a) and Rps6.

## Sheet: e
	Log2(FoldChange)				Adjusted p-value					Note:
Gene symbol	Hri-/-+Fe vs Wt+Fe	Hri-/--Fe vs Wt-Fe	Wt-Fe vs Wt+Fe	Hri-/--Fe vs Hri-/-+Fe	Hri-/-+Fe vs Wt+Fe	Hri-/--Fe vs Wt-Fe	Wt-Fe vs Wt+Fe	Hri-/--Fe vs Hri-/-+Fe		As determined using DESeq2 package of R/Bioconductor, genes with the mean of reads of the conditions greater than 100 were used for further analysis.
0610007P14Rik	0.12928	-0.190748	0.125514	-0.194514	1	0.660298	0.792634	0.716676
0610009B22Rik	-0.193247	-0.112279	-0.0474168	0.0335514	1	0.841718	0.93801	0.966984
0610009O20Rik	-0.00675638	-0.13081	0.105118	-0.0189353	1	0.587434	0.694044	0.96806
0610010F05Rik	0.0670362	-0.119696	-0.00152928	-0.188261	1	0.690471	0.998571	0.547449
0610010K14Rik	-0.0130491	0.0244456	-0.0860355	-0.0485408	1	0.963978	0.841159	0.936929
0610011F06Rik	-0.0287227	-0.0226736	-0.0280943	-0.0220451	1	0.967772	0.95983	0.974548
0610012G03Rik	-0.125619	0.0252278	-0.187627	-0.0367798	1	0.96665	0.619355	0.960515
0610030E20Rik	0.0554827	-0.109691	0.185757	0.0205837	1	0.72877	0.478279	0.97052
0610031J06Rik	-0.0365361	-0.00360365	0.103994	0.136926	1	0.994069	0.760957	0.725987
0610037L13Rik	0.011717	-0.080354	0.0142422	-0.0778289	1	0.903215	0.983456	0.918155
1110001J03Rik	-0.144513	-0.099194	-0.172445	-0.127126	1	0.846567	0.66294	0.816738
1110004E09Rik	0.0786346	-0.0199107	0.0356298	-0.0629155	1	0.975248	0.95328	0.926429
1110004F10Rik	0.0862661	-0.271833	0.100561	-0.257537	1	0.452099	0.841159	0.58882
1110008F13Rik	-0.122269	0.105949	-0.360714	-0.132496	1	0.715262	0.0465523	0.683989
1110008L16Rik	0.0400334	0.127106	-0.233691	-0.146618	1	0.821978	0.584881	0.816738
1110008P14Rik	-0.0861482	0.235948	-0.276463	0.0456332	1	0.349791	0.266764	0.933275
1110012L19Rik	-0.121054	-0.00914059	-0.105047	0.00686617	1	0.992672	0.844864	0.997281
1110032A03Rik	-0.0940386	-0.198702	0.278942	0.174278	1	0.663512	0.483405	0.773347
1110034G24Rik	-0.121947	-0.0263961	0.00920804	0.104759	1	0.968073	0.991105	0.8738
1110037F02Rik	-0.0549523	-0.0842753	-0.0531405	-0.0824635	1	0.844644	0.901589	0.869948
1110038B12Rik	0.0416907	0.0966875	0.0392541	0.0942508	1	0.822335	0.935837	0.852761
1110038F14Rik	0.241905	-0.101102	0.284927	-0.0580798	1	0.826132	0.350228	0.926719
1110057K04Rik	-0.051566	-0.182052	-0.177746	-0.308233	1	0.576089	0.589108	0.340572
1110059G10Rik	0.319187	0.0361752	0.2124	-0.0706124	1	0.95207	0.533799	0.901122
1190002F15Rik	-0.0313403	0.0825682	0.117468	0.231376	1	0.87528	0.790273	0.605965
1190002N15Rik	0.264708	-0.0115744	0.0462156	-0.230066	1	0.986744	0.926704	0.566054
1200014J11Rik	0.0983711	-0.0451046	0.0785416	-0.064934	1	0.908143	0.796768	0.872621
1300002E11Rik	-0.0475134	0.0804461	-0.0109159	0.117044	1	0.849675	0.982218	0.792491
1300017J02Rik	-0.215009	0.232574	-0.144062	0.30352	1	0.50319	0.729882	0.440774
1500012F01Rik	0.0864979	-0.0158662	0.417243	0.314879	1	0.985688	0.257933	0.547249
1600002H07Rik	0.138089	0.110827	0.0339932	0.00673121	1	0.690433	0.926825	0.992157
1600012H06Rik	0.152987	0.148388	0.258522	0.253924	1	0.721079	0.439575	0.545084
1600020E01Rik	0.0270972	-0.116242	0.369197	0.225858	1	0.86439	0.372652	0.72841
1700001L05Rik	0.142321	-0.154523	0.251593	-0.0452504	1	0.777053	0.56824	0.960077
1700017B05Rik	-0.241549	0.298751	-0.297202	0.243099	1	0.247513	0.279344	0.509414
1700020I14Rik	-0.043337	0.280526	-0.247714	0.0761491	1	0.407133	0.497533	0.906145
1700021F05Rik	-0.0767538	-0.0719439	-0.0350895	-0.0302797	1	0.902145	0.954628	0.968056
1700021K19Rik	0.0127829	-0.126965	-0.146295	-0.286043	1	0.764412	0.708485	0.44858
1700037H04Rik	-0.0439102	0.315528	-0.0435055	0.315933	1	0.0520217	0.900053	0.13872
1700052K11Rik	0.233825	-0.245194	0.439841	-0.0391787	1	0.505358	0.140624	0.960651
1700052N19Rik	0.0309327	-0.150956	-0.00438218	-0.186271	1	0.506985	0.993277	0.482151
1700066M21Rik	-0.0109799	-0.0689255	-0.0602445	-0.11819	1	0.893294	0.900001	0.818123
1700086O06Rik	0.201152	-0.0616629	0.131093	-0.131722	1	0.911183	0.74783	0.797914
1700123O20Rik	-0.069316	0.102808	-0.0207635	0.151361	1	0.783182	0.967913	0.705099
1810013L24Rik	-0.292379	0.0600902	-0.24444	0.108029	1	0.887711	0.331933	0.799218
1810022K09Rik	0.190907	-0.0972522	0.21727	-0.0708891	1	0.89298	0.663235	0.93686
1810026B05Rik	0.146598	0.0628518	0.380092	0.296346	1	0.929008	0.29164	0.557625
1810026J23Rik	-0.0253633	0.110939	-0.173531	-0.0372282	1	0.632686	0.386819	0.926906
1810030O07Rik	0.111151	0.141634	0.134372	0.164855	1	0.732824	0.74783	0.736371
1810032O08Rik	0.19058	-0.0994922	0.523828	0.233755	1	0.889425	0.141947	0.718782
1810037I17Rik	-0.0517143	-0.0632666	0.0218681	0.0103158	1	0.920288	0.975603	0.992202
1810043H04Rik	-0.135468	0.10188	-0.279838	-0.0424902	1	0.85797	0.451695	0.957662
1810053B23Rik	-0.446379	0.0682907	0.0249054	0.539575	1	0.918819	0.973178	0.147311
1810055G02Rik	-0.21375	-0.181699	-0.254649	-0.222598	1	0.62376	0.432425	0.611215
1810058I24Rik	-0.236516	0.121152	-0.169546	0.188122	1	0.743379	0.600349	0.629786
2010107E04Rik	-0.00632812	0.182204	-0.280801	-0.092269	1	0.633518	0.386819	0.876712
2010111I01Rik	0.0875034	-0.101288	0.254108	0.0653161	1	0.86439	0.546341	0.933275
2210016F16Rik	-0.110268	-0.0724862	-0.319691	-0.281909	1	0.887233	0.269231	0.454869
2210016L21Rik	0.224257	0.0748604	-0.0891232	-0.23852	1	0.907256	0.865008	0.645113
2210018M11Rik	0.0165414	0.146139	-0.0235379	0.106059	1	0.731481	0.970633	0.852761
2300009A05Rik	-0.0210359	0.0627854	-0.168785	-0.0849632	1	0.925262	0.717454	0.902171
2310003H01Rik	-0.111644	0.240011	-0.0976667	0.253988	1	0.552169	0.850622	0.615942
2310009A05Rik	-0.0222208	-0.260363	0.126244	-0.111898	1	0.464608	0.785586	0.853815
2310011J03Rik	0.0582127	0.0365953	-0.0138631	-0.0354805	1	0.932823	0.975934	0.941711
2310022A10Rik	0.0328864	-0.263399	-0.0179745	-0.31426	1	0.0990887	0.962131	0.100559
2310022B05Rik	0.218118	-0.146734	0.314055	-0.050797	1	0.761264	0.372652	0.946209
2310033P09Rik	0.136709	0.00811857	-0.0620122	-0.190603	1	0.989803	0.869311	0.578815
2310035C23Rik	0.0605413	0.116308	0.0203415	0.076108	1	0.739379	0.968429	0.875904
2310036O22Rik	-0.0887688	0.0526089	-0.205672	-0.0642938	1	0.900239	0.413865	0.887792
2310039H08Rik	-0.111748	-0.00779058	-0.0198237	0.0841335	1	0.992722	0.975934	0.890036
2310045N01Rik	-0.0406458	0.101763	-0.160213	-0.0178046	1	0.792186	0.619355	0.976231
2310047M10Rik	0.00423974	0.477107	-0.162759	0.310108	1	0.107196	0.733756	0.511966
2310057M21Rik	0.00512014	-0.0597029	0.0323263	-0.0324967	1	0.915617	0.956201	0.965307
2310061I04Rik	0.0265365	-0.24445	0.0543326	-0.216654	1	0.556734	0.928528	0.692221
2310067B10Rik	-0.0851019	-0.0545939	0.0006147	0.0311227	1	0.909613	0.999513	0.960077
2410002F23Rik	0.200936	-0.155718	0.417448	0.0607943	1	0.780637	0.257777	0.941239
2410004B18Rik	0.00572655	0.351615	-0.185077	0.160811	1	0.165452	0.603994	0.725987
2410006H16Rik	0.0715062	-0.313209	0.668667	0.283952	1	0.46332	0.0357731	0.621106
2410015M20Rik	-0.0214695	0.0212165	-0.0713788	-0.0286929	1	0.960979	0.827549	0.954584
2410016O06Rik	0.114415	-0.113787	0.134729	-0.0934734	1	0.851821	0.793244	0.897551
2410076I21Rik	-0.12557	0.221067	-0.0830932	0.263544	1	0.482327	0.84749	0.476943
2410127L17Rik	0.19208	-0.0470855	0.117762	-0.121403	1	0.955558	0.843005	0.877043
2500004C02Rik	-0.017487	-0.0637596	0.161418	0.115145	1	0.919785	0.724296	0.855069
2510002D24Rik	-0.077624	-0.362261	0.513391	0.228754	1	0.239257	0.0730624	0.645693
2510003E04Rik	0.00120408	0.0229495	-0.116008	-0.0942621	1	0.960979	0.723052	0.824999
2510039O18Rik	0.0294206	0.0891194	0.0453703	0.105069	1	0.814074	0.912132	0.807392
2610001J05Rik	0.0807646	0.130812	-0.0547199	-0.00467299	1	0.781469	0.920089	0.997913
2610002M06Rik	-0.0135281	-0.174238	0.0712641	-0.0894456	1	0.601476	0.865879	0.86281
2610008E11Rik	0.118316	-0.00430283	0.283809	0.16119	1	0.994702	0.420334	0.770717
2610020C07Rik	0.0321964	-0.108141	0.0617435	-0.0785942	1	0.855365	0.917381	0.916185
2610020H08Rik	0.0637176	-0.20357	0.450817	0.183529	1	0.687068	0.207489	0.78047
2610027K06Rik	0.0677166	0.315393	-0.0715187	0.176158	1	0.478589	0.911468	0.805482
2610301B20Rik	0.0730604	0.0454942	0.0294719	0.00190571	1	0.938624	0.959273	0.999689
2610318N02Rik	-0.268298	-0.413052	-0.0468224	-0.191576	1	0.0671685	0.922417	0.648628
2610507B11Rik	-0.135359	-0.150505	-0.224674	-0.23982	1	0.697693	0.496422	0.547249
2610507I01Rik	0.347697	0.12877	0.337803	0.118875	1	0.734175	0.209825	0.807643
2700029M09Rik	0.107494	-0.0629458	0.0762842	-0.0941558	1	0.91127	0.868842	0.870911
2700049A03Rik	-0.00942741	-0.0699271	-0.0122619	-0.0727616	1	0.885638	0.982216	0.894223
2700060E02Rik	0.0644524	-0.141923	0.0467864	-0.159589	1	0.795326	0.942869	0.803518
2700081O15Rik	-0.0343869	-0.17405	0.161414	0.0217509	1	0.732824	0.747408	0.980658
2700089E24Rik	0.127856	-0.318646	0.360365	-0.0861364	1	0.427661	0.349213	0.91253
2700094K13Rik	0.0210781	-0.0483835	-0.0945223	-0.163984	1	0.939239	0.843574	0.759848
2700097O09Rik	0.226318	0.167414	-0.0212529	-0.0801568	1	0.590532	0.967913	0.872277
2700099C18Rik	0.23699	0.0546779	0.486591	0.304279	1	0.936371	0.118685	0.514253
2810004N23Rik	0.075843	-0.152069	-0.0984758	-0.326388	1	0.749993	0.84572	0.453552
2810006K23Rik	-0.105579	-0.0820006	-0.0707907	-0.0472119	1	0.902704	0.905474	0.955441
2810013P06Rik	0.0322762	0.136978	0.264292	0.368994	1	0.827656	0.567559	0.473081
2810021J22Rik	-0.291176	-0.0677305	0.0537508	0.277196	1	0.908686	0.92197	0.530416
2810403A07Rik	0.129866	-0.234538	0.600288	0.235884	1	0.370002	0.00169013	0.482523
2810408I11Rik	0.0977641	-0.374381	0.40503	-0.0671151	1	0.221708	0.193134	0.925746
2810417H13Rik	0.19235	-0.221782	0.149199	-0.264933	1	0.591077	0.751124	0.589942
2810428I15Rik	-0.0932805	0.367983	-0.365021	0.0962417	1	0.08133	0.121061	0.835662
2810474O19Rik	-0.243191	0.112402	-0.00619169	0.349401	1	0.820601	0.993521	0.359061
2900097C17Rik	0.195859	0.0147165	0.102249	-0.0788933	1	0.987903	0.860318	0.925701
3010026O09Rik	-0.236187	-0.273929	0.250861	0.21312	1	0.458135	0.52659	0.686994
3110002H16Rik	-0.223948	0.405616	-0.245446	0.384118	1	0.123082	0.481806	0.272727
3110062M04Rik	-0.116392	-0.00732131	-0.0406537	0.0684171	1	0.992935	0.94775	0.924271
3830406C13Rik	0.0371773	-0.209248	0.120334	-0.126092	1	0.476288	0.744804	0.786962
4632428N05Rik	0.209299	0.450285	-0.348914	-0.107928	1	0.17382	0.367179	0.881618
4632434I11Rik	-0.0562995	0.122933	-0.110488	0.0687451	1	0.718096	0.749625	0.888384
4833420G17Rik	-0.148925	0.209324	-0.0313803	0.326868	1	0.450943	0.94775	0.256153
4833439L19Rik	-0.144989	-0.0691949	-0.163454	-0.0876598	1	0.866118	0.583236	0.844711
4921524J17Rik	0.203602	0.0090198	0.280611	0.0860285	1	0.992422	0.46571	0.901122
4930402H24Rik	-0.11118	0.177058	-0.28561	0.00262777	1	0.697693	0.440346	0.999248
4930404N11Rik	-0.377344	0.20123	-0.314082	0.264492	1	0.678989	0.432142	0.631686
4930413G21Rik	-0.0805986	0.127473	-0.214215	-0.00614402	1	0.807525	0.604564	0.997281
4930427A07Rik	0.153696	-0.0299682	0.184143	0.000478286	1	0.954618	0.54583	0.999689
4930430F08Rik	0.0393019	-0.0914444	0.0958933	-0.034853	1	0.851417	0.827549	0.961045
4930453N24Rik	0.214264	0.0384791	0.107012	-0.0687722	1	0.955888	0.835292	0.925746
4930481A15Rik	-0.144408	0.266006	-0.234928	0.175486	1	0.563869	0.619355	0.797476
4930503L19Rik	0.570026	0.0964447	0.345282	-0.128299	0.390935	0.861948	0.29336	0.825272
4930523C07Rik	-0.150022	-0.0871908	-0.130071	-0.0672398	1	0.861791	0.750826	0.913232
4930579G24Rik	0.0701705	0.0659103	-0.0757151	-0.0799752	1	0.877676	0.843265	0.868199
4930581F22Rik	0.0845665	-0.161909	0.41423	0.167754	1	0.740511	0.212053	0.780828
4931406P16Rik	-0.203535	0.257435	-0.168337	0.292632	1	0.523012	0.719185	0.545084
4931414P19Rik	-0.0175676	-0.0720391	-0.0206513	-0.0751228	1	0.89004	0.974523	0.899914
4932438A13Rik	-0.193848	0.10857	-0.136415	0.166004	1	0.806732	0.728242	0.716676
4933411K20Rik	0.0350947	-0.17787	0.178878	-0.0340865	1	0.609719	0.614636	0.961045
4933426M11Rik	-0.0865973	-0.0444763	0.0209225	0.0630434	1	0.929008	0.968187	0.902105
4933427D14Rik	-0.0182143	-0.127883	0.154627	0.0449583	1	0.784179	0.717302	0.950362
4933434E20Rik	-0.171655	-0.172035	-0.0146634	-0.0150433	1	0.55528	0.975934	0.980658
5031425E22Rik	-0.0078566	0.348417	0.0537369	0.41001	1	0.39607	0.937663	0.401035
5033406O09Rik	-0.163348	0.386836	0.055078	0.605262	1	0.347279	0.937644	0.156397
5430417L22Rik	-0.0381413	-0.246926	-0.00310643	-0.211891	1	0.369217	0.997632	0.573455
5530601H04Rik	0.00646866	0.0943835	0.0521474	0.140062	1	0.86439	0.927321	0.812583
5730455P16Rik	0.117146	-0.319384	0.224541	-0.211989	1	0.120907	0.390191	0.522978
5730508B09Rik	-0.0452858	0.061077	-0.0656689	0.0406939	1	0.904039	0.880076	0.947303
5830415F09Rik	-0.0346443	0.524777	-0.314794	0.244627	1	0.0995182	0.443674	0.675571
5830417I10Rik	0.2225	-0.0524274	0.139399	-0.135528	1	0.928898	0.737652	0.797914
5830418K08Rik	0.0127837	-0.144218	0.170485	0.0134837	1	0.704178	0.627439	0.985109
6030458C11Rik	0.0528183	-0.0106306	-0.0027927	-0.0662417	1	0.979683	0.99686	0.855069
6030468B19Rik	-0.0474193	0.136216	0.0180314	0.201666	1	0.698791	0.974637	0.590415
8030462N17Rik	-0.0404012	-0.185155	-0.150321	-0.295074	1	0.397116	0.554584	0.196404
8430419L09Rik	-0.0697597	0.0476906	-0.0453493	0.072101	1	0.91966	0.916122	0.885774
8430427H17Rik	0.00487406	-0.116607	-0.11419	-0.23567	1	0.727422	0.730349	0.44858
9030624J02Rik	-0.0356241	0.0225451	-0.0387737	0.0193955	1	0.958188	0.914667	0.969872
9130023H24Rik	-0.30868	-0.275766	0.0465498	0.0794636	1	0.38418	0.929445	0.897376
9130221H12Rik	0.139617	0.272063	-0.00571074	0.126735	1	0.288291	0.993277	0.780415
9230114K14Rik	0.131721	-0.188279	0.11094	-0.20906	1	0.692477	0.838152	0.714492
9430015G10Rik	-0.104072	-0.291684	0.40322	0.215608	1	0.49491	0.278365	0.722322
9430016H08Rik	0.0743715	-0.0890671	0.0210628	-0.142376	1	0.830021	0.968429	0.738003
9530068E07Rik	0.0227999	0.00410808	0.139719	0.121027	1	0.993012	0.604564	0.728111
9830132P13Rik	-0.084498	0.327648	-0.390611	0.021535	1	0.420779	0.29959	0.98149
9930021J03Rik	0.123493	-0.162102	0.252552	-0.0330429	1	0.603352	0.356099	0.95624
9930104L06Rik	0.0351398	-0.0219898	0.203513	0.146383	1	0.972789	0.614724	0.798999
A230046K03Rik	0.172741	-0.0335132	0.272711	0.0664569	1	0.95676	0.411041	0.918155
A430005L14Rik	0.12481	-0.085023	-0.0480079	-0.257841	1	0.83909	0.912136	0.429486
A630007B06Rik	-0.158541	-0.0145124	-0.202143	-0.0581143	1	0.984089	0.613893	0.934906
A730036I17Rik	-0.244867	0.0332055	-0.384018	-0.105945	1	0.96292	0.2867	0.881248
A830010M20Rik	-0.182552	0.0885072	-0.20938	0.0616795	1	0.893294	0.653823	0.939638
A830080D01Rik	0.253258	-0.0991378	0.390491	0.0380948	1	0.824331	0.130071	0.953648
A930006K02Rik	-0.123401	0.17858	0.0457551	0.347736	1	0.75065	0.950486	0.514253
AA986860	-0.230032	0.0676819	-0.160894	0.13682	1	0.86939	0.591326	0.726592
Aaas	0.0858491	-0.152123	0.0598144	-0.178158	1	0.552169	0.858869	0.554258
Aaed1	-0.0893289	-0.403702	0.358974	0.0446013	1	0.125841	0.236389	0.949562
Aagab	0.0312179	-0.0647652	0.0766474	-0.0193356	1	0.863492	0.819554	0.971377
Aak1	-0.107678	-0.02284	-0.226982	-0.142143	1	0.965465	0.450076	0.75294
Aamp	-0.0542314	0.216525	-0.15902	0.111737	1	0.228921	0.468146	0.716676
Aar2	-0.0975347	-0.0636354	-0.163637	-0.129738	1	0.891197	0.619015	0.772899
Aars	-0.17609	-0.478548	0.144342	-0.158116	1	0.0110613	0.666657	0.695
Aars2	0.104355	-0.0267956	0.217308	0.0861569	1	0.965465	0.572868	0.890368
Aarsd1	-0.0868037	-0.14294	-0.0792927	-0.135429	1	0.680077	0.843574	0.76189
Aasdhppt	-0.0278715	-0.288297	0.181307	-0.0791181	1	0.33674	0.626154	0.892828
Aatf	-0.029609	-0.157901	-0.197825	-0.326117	1	0.703343	0.592028	0.390479
Abca3	0.0279885	-0.108609	0.115943	-0.0206553	1	0.760837	0.733803	0.972375
Abca7	-0.102426	-0.0164931	0.128699	0.214632	1	0.979683	0.757569	0.629377
Abcb10	-0.0773922	0.143351	-0.127247	0.0934963	1	0.576632	0.637763	0.805416
Abcb4	0.126727	-0.121809	0.188825	-0.0597105	1	0.665801	0.432186	0.890036
Abcb6	-0.0559812	0.169487	-0.142459	0.0830093	1	0.427622	0.557297	0.816738
Abcb7	-0.0578865	0.0116854	-0.170713	-0.101141	1	0.981994	0.564417	0.816738
Abcb8	0.0694574	-0.191127	0.0867545	-0.17383	1	0.587888	0.845592	0.708102
Abcb9	0.0206148	0.389011	-0.0599702	0.308426	1	0.220883	0.917381	0.498394
Abcc1	-0.144452	0.0251829	-0.0862287	0.083406	1	0.969466	0.872054	0.904544
Abcc5	0.268263	-0.330042	0.704866	0.106561	1	0.256574	0.00215402	0.852444
Abcd1	-0.174283	0.0276437	-0.30007	-0.0981434	1	0.959077	0.250022	0.835889
Abcd3	-0.0521271	0.11417	-0.0305969	0.1357	1	0.844644	0.964476	0.830483
Abce1	-0.0206128	-0.264202	-0.061694	-0.305283	1	0.341857	0.88905	0.359061
Abcf1	0.0197736	-0.0518263	-0.175078	-0.246678	1	0.903321	0.5156	0.389472
Abcf2	-0.0482775	-0.230851	-0.22404	-0.406614	1	0.49491	0.519231	0.217054
Abcf3	-0.00201748	-0.062182	-0.030376	-0.0905406	1	0.875263	0.944459	0.826982
Abcg2	-0.0918043	0.0640327	-0.0605483	0.0952887	1	0.831325	0.833421	0.764148
Abcg4	0.124451	-0.195355	0.308247	-0.0115587	1	0.479373	0.191127	0.985949
Abhd10	0.141169	-0.159201	0.108462	-0.191908	1	0.495057	0.698505	0.482506
Abhd11	-0.205625	-0.145064	0.146308	0.206869	1	0.784312	0.766858	0.717814
Abhd12	-0.0164208	-0.161469	0.0148531	-0.130195	1	0.574348	0.975934	0.741396
Abhd13	0.00113926	0.0947211	-0.0521613	0.0414206	1	0.811234	0.9017	0.940566
Abhd16a	0.14936	0.0337808	0.116151	0.000571855	1	0.953727	0.762679	0.999689
Abhd17a	-0.0455149	0.17816	-0.298366	-0.0746906	1	0.436673	0.12531	0.849617
Abhd17c	-0.0414476	-0.0887612	-0.0904232	-0.137737	1	0.868236	0.850622	0.807643
Abhd2	-0.185037	0.00828606	-0.278154	-0.0848317	1	0.992722	0.498386	0.90998
Abhd4	-0.240747	0.135141	0.181363	0.557252	1	0.814852	0.707705	0.142376
Abhd5	-0.0255162	0.0911494	-0.411355	-0.29469	1	0.774301	0.0225569	0.217054
Abhd8	-0.120638	-0.00475363	-0.383211	-0.267326	1	0.993789	0.144485	0.476943
Abi1	-0.0752068	0.0767048	0.0291852	0.181097	1	0.841718	0.94775	0.590415
Abi3	-0.286007	0.347875	-0.276216	0.357666	1	0.305098	0.472358	0.405394
Abl1	0.0863821	-0.161345	0.171707	-0.0760202	1	0.547932	0.529918	0.859855
Abl2	-0.182767	-0.0902325	-4.49e-05	0.0924899	1	0.86439	0.999779	0.879855
Abracl	0.18294	0.167731	-0.149606	-0.164815	1	0.740739	0.76246	0.79498
Abt1	0.0112684	0.0514584	0.0390904	0.0792804	1	0.90772	0.926557	0.860338
Abtb1	-0.23456	0.29614	-0.149822	0.380878	1	0.379193	0.735321	0.31925
Abtb2	-0.384987	0.0248774	-0.0614369	0.348428	1	0.969257	0.914667	0.420365
Acaa1a	0.165053	0.268087	-0.166473	-0.063439	1	0.457181	0.705265	0.930647
Acaa2	-0.0308057	0.270912	-0.302498	-0.000780667	1	0.362095	0.303521	0.999689
Acaca	0.239001	-0.0461516	-0.0945184	-0.379671	1	0.952738	0.864829	0.409541
Acad9	-0.0911585	-0.076566	-0.115999	-0.101407	1	0.88039	0.782513	0.853815
Acadl	0.192424	0.0343874	0.0164235	-0.141613	1	0.943478	0.974683	0.714205
Acadm	0.271033	0.368656	0.0968439	0.194467	1	0.16746	0.834867	0.674877
Acads	0.170926	0.358698	-0.20006	-0.012288	1	0.325963	0.666657	0.991538
Acadsb	-0.193317	-0.585941	0.107094	-0.285529	1	2.16e-06	0.689281	0.197189
Acadvl	-0.0414044	0.112741	-0.151184	0.00296043	1	0.731895	0.606989	0.997932
Acap2	-0.10836	0.0329239	-0.0952287	0.0460556	1	0.94654	0.784828	0.930647
Acap3	-0.140644	-0.171858	0.0509813	0.019767	1	0.578228	0.904718	0.974364
Acat1	0.0183661	-0.158939	0.197298	0.0199929	1	0.661652	0.56246	0.976104
Acat2	0.149489	-0.0301068	-0.0300083	-0.209604	1	0.963836	0.964476	0.695181
Acbd3	0.0466971	0.0646391	0.0882136	0.106156	1	0.868166	0.792587	0.794075
Acbd4	-0.157712	0.255869	-0.359941	0.0536398	1	0.421337	0.203142	0.934887
Acbd5	-0.0886036	0.253834	-0.162891	0.179547	1	0.29472	0.591939	0.624219
Acbd6	-0.129002	-0.140352	-0.00248673	-0.0138363	1	0.601426	0.997857	0.980076
Acd	0.0207757	-0.181758	0.179956	-0.0225778	1	0.505358	0.531009	0.968824
Acer3	0.0980047	-0.100159	0.0663601	-0.131803	1	0.83844	0.892323	0.807071
Ache	0.000899069	0.421025	-0.196212	0.223914	1	0.12484	0.620928	0.644522
Acin1	-0.0798044	-0.0707138	-0.0327657	-0.0236751	1	0.86439	0.942391	0.967177
Ackr1	-0.165336	0.282791	-0.284432	0.163696	1	0.193775	0.226137	0.648628
Ackr3	-0.02748	-0.209057	0.318472	0.136895	1	0.50653	0.180173	0.772899
Acly	-0.116594	0.0765025	-0.233827	-0.0407308	1	0.88913	0.51632	0.9548
Acmsd	-0.166032	0.307953	-0.548166	-0.0741818	1	0.312517	0.0327377	0.902877
Aco1	0.202104	0.512032	-0.214174	0.0957534	1	0.0268991	0.567249	0.871807
Aco2	-0.0953886	0.100678	-0.318118	-0.122051	1	0.816268	0.237351	0.800669
Acot11	-0.247045	0.176071	-0.351867	0.0712488	1	0.588709	0.159335	0.892828
Acot13	0.0223645	-0.0323006	-0.0778355	-0.132501	1	0.953091	0.84572	0.764148
Acot8	-0.0332563	0.302419	-0.124279	0.211396	1	0.264766	0.753535	0.609458
Acot9	0.0665198	-0.0234492	-0.0348572	-0.124826	1	0.969257	0.955726	0.828437
Acox1	-0.0822342	0.19239	-0.133257	0.141367	1	0.449522	0.659909	0.700411
Acp1	0.18155	-0.118714	0.0561995	-0.244065	1	0.811665	0.917377	0.592607
Acp2	0.0111821	-0.158027	0.204507	0.0352974	1	0.698791	0.582234	0.963381
Acp5	0.161552	-0.176982	0.287571	-0.0509627	1	0.421988	0.130087	0.901122
Acsf3	-0.207772	0.40358	-0.407861	0.203491	1	0.0694526	0.0992209	0.61473
Acsl1	-0.0897512	0.471047	-0.298026	0.262772	1	0.0501693	0.356112	0.534819
Acsl3	0.133428	0.0368621	-0.310917	-0.407482	1	0.951285	0.276396	0.184302
Acsl4	-0.00609207	0.299135	-0.320745	-0.0155183	1	0.138006	0.135946	0.976874
Acsl5	0.0145045	-0.327874	0.215102	-0.127276	1	0.264773	0.560621	0.816738
Acss1	0.0191258	0.0657536	0.0636787	0.110306	1	0.86784	0.859593	0.786709
Acss2	-0.070341	-0.158345	0.154692	0.066688	1	0.616484	0.632031	0.896505
Actb	-0.60027	-0.300025	-0.302754	-0.00250919	0.0243954	0.241657	0.264709	0.999166
Actg1	0.182896	0.429904	-0.101655	0.145353	1	0.0699163	0.814597	0.771775
Actl6a	0.10503	-0.171112	0.125107	-0.151034	1	0.380974	0.589034	0.56573
Actn4	-0.0174891	0.0645679	-0.256212	-0.174155	1	0.862467	0.239417	0.57704
Actr10	-0.0256373	0.0843305	-0.143822	-0.033854	1	0.77698	0.561282	0.939638
Actr1a	-0.0108631	0.104336	-0.230112	-0.114912	1	0.558134	0.0883075	0.594556
Actr1b	-0.0771963	-0.0312653	0.0144472	0.0603782	1	0.94822	0.975934	0.898233
Actr2	0.0326988	0.0012551	0.00144876	-0.0299949	1	0.997712	0.998969	0.965977
Actr3	0.143325	0.0622467	0.126699	0.0456204	1	0.920288	0.788254	0.95238
Actr5	-0.00387215	-0.143629	0.0770716	-0.0626855	1	0.720611	0.864775	0.920838
Actr6	0.389852	0.196146	0.184906	-0.00880004	1	0.65546	0.68012	0.994765
Actr8	0.124874	0.0542632	0.155507	0.0848955	1	0.917899	0.667451	0.875904
Acyp1	0.0608336	-0.0236424	0.189524	0.105048	1	0.96341	0.557505	0.825054
Adal	-0.00803335	-0.323941	0.0344798	-0.281428	1	0.247854	0.951978	0.471898
Adam10	-0.129712	0.152625	-0.272548	0.0097892	1	0.649225	0.309899	0.989941
Adam17	0.0184438	0.0278292	-0.0217984	-0.012413	1	0.952831	0.960157	0.982411
Adamtsl5	-0.163677	-0.266238	0.358263	0.255702	1	0.419905	0.240489	0.55702
Adar	-0.218673	0.491107	-0.554583	0.155197	1	0.0934815	0.0652464	0.805416
Adat3	-0.112783	0.122197	-0.099224	0.135756	1	0.721703	0.784736	0.741396
Adck2	0.106653	-0.227492	0.313197	-0.0209488	1	0.525624	0.337796	0.976874
Adck4	-0.113772	-0.0828452	-0.0139978	0.0169287	1	0.878196	0.982216	0.983116
Adck5	-0.11756	-0.0434454	0.29055	0.364665	1	0.949235	0.420334	0.374942
Adcy6	0.182107	0.0403802	0.206962	0.0652353	1	0.952738	0.595793	0.925184
Adcy7	-0.0497046	-0.182667	0.390996	0.258034	1	0.590827	0.127159	0.485477
Add1	-0.158459	0.133366	-0.295212	-0.00338734	1	0.723341	0.281399	0.997982
Add2	-0.148156	0.229955	-0.340224	0.0378869	1	0.453112	0.203142	0.953648
Add3	-0.227208	-0.310925	0.0655328	-0.0181843	1	0.289896	0.892974	0.980658
Adh5	-0.120801	0.0388583	-0.296079	-0.13642	1	0.94822	0.322422	0.789413
Adi1	0.00683342	0.102712	-0.0851152	0.0107635	1	0.857184	0.869311	0.992202
Adipor1	-0.333968	0.326874	-0.406742	0.2541	1	0.321056	0.188313	0.590415
Adipor2	-0.0683076	-0.115021	-0.0143785	-0.0610915	1	0.654608	0.972943	0.875543
Adk	0.00916731	-0.27546	-0.000541836	-0.285169	1	0.126456	0.999513	0.218786
Adnp	-0.0286711	0.0630876	-0.0326896	0.0590691	1	0.831753	0.9183	0.869333
Adnp2	-0.134837	0.162286	-0.189569	0.107554	1	0.631289	0.566482	0.823854
Ado	-0.00929612	-0.192082	0.0237931	-0.158993	1	0.629682	0.971054	0.771192
Adpgk	0.00926734	-0.460824	0.524313	0.0542219	1	0.0335035	0.0274934	0.931371
Adprh	0.040077	-0.0481243	-0.0304654	-0.118667	1	0.917275	0.94775	0.777825
Adprhl2	0.118665	0.00214315	0.201575	0.0850525	1	0.996908	0.584685	0.887563
Adprm	0.023433	-0.140691	0.0767272	-0.0873963	1	0.781601	0.889316	0.899263
Adra2b	0.143575	0.377229	-0.0502342	0.18342	1	0.275127	0.936775	0.76189
Adrb2	-0.243285	0.349693	-0.332463	0.260516	1	0.325963	0.372652	0.620404
Adrbk1	0.0490775	0.0995866	-0.152198	-0.101688	1	0.763439	0.586374	0.800071
Adrm1	0.147283	-0.0694355	-0.0144633	-0.231181	1	0.892297	0.979964	0.56573
Adsl	-0.046902	-0.324609	-0.0380546	-0.315761	1	0.16066	0.9352	0.302723
Adss	0.0275927	-0.113391	-0.0996646	-0.240648	1	0.743562	0.776336	0.450976
Aebp2	0.121094	-0.182454	0.381827	0.0782797	1	0.453393	0.0477776	0.852366
Aen	-0.159802	-0.395121	0.240605	0.00528664	1	0.0825658	0.43115	0.997281
Aes	0.0846316	0.120953	-0.118395	-0.0820732	1	0.693791	0.702435	0.847445
Aff1	-0.257613	0.243339	-0.405381	0.0955712	1	0.531016	0.200055	0.886022
Aff4	-0.0283883	-0.0883076	0.11022	0.0503009	1	0.869871	0.814597	0.944792
Afg3l1	-0.057488	-0.203058	-0.0949985	-0.240569	1	0.482458	0.799925	0.478966
Afg3l2	-0.101398	-0.0139744	-0.167929	-0.0805049	1	0.973511	0.483405	0.830483
Afmid	0.371132	-0.0939374	0.234221	-0.230848	1	0.878196	0.588025	0.674877
Afp	-0.0233699	0.257281	-0.0121929	0.268458	1	0.452003	0.982322	0.5338
Aftph	-0.0214376	0.112272	-0.0843126	0.0493969	1	0.731481	0.806038	0.923866
Agap3	0.0368133	-0.0185098	-0.04885	-0.104173	1	0.973449	0.917381	0.833951
Agbl5	-0.0197493	-0.104024	0.217177	0.132902	1	0.862717	0.621776	0.837147
Agfg1	-0.250829	0.0942636	-0.329377	0.0157156	1	0.80035	0.14222	0.978295
Agfg2	0.116293	0.0953186	-0.0980617	-0.119036	1	0.718096	0.705032	0.686855
Aggf1	0.0264983	-0.0424938	0.105704	0.0367117	1	0.892623	0.643914	0.924271
Agl	-0.00395316	0.0183408	-0.0481606	-0.0258667	1	0.981908	0.944631	0.976666
Ago1	0.16079	0.396443	0.0926627	0.328316	1	0.176011	0.852529	0.434185
Ago2	-0.249279	0.135898	-0.557046	-0.171869	1	0.784568	0.0477776	0.76189
Agpat1	-0.080185	0.1346	-0.273477	-0.0586919	1	0.567148	0.131738	0.878024
Agpat4	-0.0297713	0.313692	-0.00162481	0.341838	1	0.143203	0.998571	0.2068
Agpat5	-0.173683	-0.189201	0.117211	0.101693	1	0.508732	0.737456	0.822941
Agpat6	-0.0774443	-0.148298	-0.193214	-0.264068	1	0.645115	0.512954	0.403751
Agps	0.0178432	0.103541	-0.143368	-0.05767	1	0.815467	0.703862	0.9244
Agrn	-0.0917362	-0.0265876	0.415337	0.480485	1	0.972125	0.27157	0.276508
Agtpbp1	0.0476602	-0.190833	0.0625379	-0.175956	1	0.39607	0.850379	0.554258
Agtrap	-0.294149	-0.164046	0.197436	0.327539	1	0.635241	0.557694	0.326167
Ahctf1	-0.0506265	0.063509	-0.253521	-0.139385	1	0.841755	0.163932	0.627647
Ahcy	0.213849	-0.315703	0.125056	-0.404496	1	0.440139	0.821049	0.389472
Ahcyl1	-0.0176634	-0.0882559	0.0499224	-0.0206702	1	0.740511	0.865879	0.965307
Ahcyl2	-0.110461	-0.314156	-0.00189385	-0.205589	1	0.24523	0.998571	0.629786
Ahi1	0.0577907	-0.00116132	-0.0594544	-0.118406	1	0.997511	0.875828	0.773347
Ahsa1	-0.102714	0.589014	-0.405193	0.286535	1	0.00038474	0.0615285	0.340572
Ahsa2	0.266506	0.476837	0.0539121	0.264243	1	0.0273017	0.912132	0.485214
AI314180	-0.080113	-0.0472017	-0.216956	-0.184044	1	0.912354	0.376855	0.566054
AI462493	-0.0125986	0.0933477	0.0882016	0.194148	1	0.857184	0.850683	0.684062
AI467606	0.100412	0.358506	0.240716	0.498811	1	0.230735	0.529918	0.128075
AI597479	0.136028	-0.19572	-0.000322969	-0.332072	1	0.590096	0.999779	0.366319
AI662270	0.212942	0.127748	0.179813	0.0946183	1	0.841605	0.715141	0.902171
AI837181	0.0249304	-0.0241642	0.163781	0.114687	1	0.967179	0.671745	0.830483
Aida	0.193671	-0.0906699	0.075516	-0.208825	1	0.856196	0.86928	0.641667
Aifm1	0.155425	-0.0971054	-0.018499	-0.27103	1	0.732824	0.963792	0.234955
Aim2	0.0502893	0.157173	0.16261	0.269494	1	0.72575	0.705656	0.547249
Aimp1	0.13807	-0.128932	0.1011	-0.165901	1	0.745697	0.804514	0.711467
Aimp2	0.211471	0.379643	-0.199698	-0.0315263	1	0.01509	0.383425	0.947303
Aip	-0.0872069	0.27694	-0.471285	-0.107138	1	0.143865	0.00611933	0.773594
AK010878	0.116009	-0.000502282	0.03482	-0.0816913	1	0.9991	0.961538	0.918495
Ak2	0.128701	-0.0581774	-0.099329	-0.286207	1	0.911183	0.804363	0.406726
Ak3	-0.0396082	0.0328812	-0.187465	-0.114976	1	0.954279	0.569396	0.81463
Ak6	0.0343382	-0.0416852	-0.118726	-0.194749	1	0.947362	0.787646	0.681377
Akap1	-0.139172	0.0236091	-0.287699	-0.124918	1	0.969868	0.415162	0.833951
Akap10	-0.05533	0.0222489	-0.0808141	-0.00323517	1	0.959462	0.796239	0.997913
Akap11	-0.00436807	-0.298397	0.178108	-0.115921	1	0.141265	0.51682	0.773208
Akap13	-0.29345	0.328232	-0.444496	0.177186	1	0.354729	0.165083	0.763147
Akap7	-0.14104	0.418309	-0.52964	0.0297085	1	0.0746169	0.0274934	0.965977
Akap8	0.0844375	-0.050686	0.166944	0.0318203	1	0.892623	0.493209	0.946542
Akap8l	-0.014644	-0.0835685	0.293325	0.224401	1	0.884532	0.407189	0.648628
Akap9	-0.203524	-0.206631	0.16587	0.162763	1	0.568452	0.671899	0.745083
Akip1	0.178869	-0.0510665	-0.0452355	-0.275171	1	0.894222	0.90029	0.261282
Akirin1	0.122966	-0.0671078	0.0523348	-0.137739	1	0.898313	0.915305	0.785055
Akirin2	-0.125782	0.0615381	-0.00877725	0.178542	1	0.860569	0.982522	0.53213
Akna	0.190469	0.613605	-0.221311	0.201825	1	0.010404	0.58	0.694028
Akr1a1	0.0663568	0.12794	0.0351521	0.096735	1	0.617376	0.922417	0.790712
Akr1e1	-0.0726794	-0.0332246	-0.285559	-0.246104	1	0.962721	0.468146	0.645205
Akr7a5	0.131451	0.110684	-0.151561	-0.172327	1	0.849818	0.752289	0.772899
Akt1	-0.0680252	-0.0820531	-0.194687	-0.208715	1	0.77698	0.350643	0.39438
Akt1s1	-0.180625	0.0142024	-0.0462871	0.14854	1	0.981908	0.926704	0.76189
Akt2	-0.0995399	-0.0811101	0.0759336	0.0943634	1	0.820423	0.823978	0.816738
Akt3	0.131923	-0.0707566	0.481614	0.278934	1	0.917899	0.144317	0.592992
Alad	-0.129726	0.122571	-0.21115	0.0411466	1	0.474033	0.141002	0.892802
Alas2	-0.246588	0.378008	-0.355902	0.268695	1	0.193655	0.260978	0.545084
Alb	-0.0312526	0.18528	-0.0643872	0.152145	1	0.625515	0.886401	0.770717
Aldh16a1	-0.0664358	-0.0779224	-0.114498	-0.125985	1	0.805414	0.668409	0.692233
Aldh18a1	-0.325915	-1.2077	0.826934	-0.054851	1	5.19e-09	0.00148942	0.945283
Aldh2	-0.00661441	0.150449	0.0740227	0.231086	1	0.493609	0.793244	0.315219
Aldh4a1	0.225651	0.117625	-0.0548383	-0.162864	1	0.830021	0.925813	0.783717
Aldh6a1	0.051906	-0.0876378	0.333195	0.193652	1	0.886435	0.36722	0.736371
Aldh7a1	0.159136	0.208352	-0.309454	-0.260237	1	0.604464	0.374567	0.575331
Aldh9a1	-0.200217	0.0406569	-0.303013	-0.062139	1	0.935359	0.21922	0.902171
Aldoa	-0.0931273	0.119626	0.135274	0.348027	1	0.857184	0.802132	0.511966
Alg10b	-0.0912098	-0.287976	0.00269747	-0.194068	1	0.284155	0.99855	0.644522
Alg11	0.0925854	-0.059064	0.0113812	-0.140268	1	0.924627	0.986698	0.807643
Alg12	-0.090976	-0.0925304	-0.00850851	-0.0100629	1	0.882531	0.992315	0.993478
Alg13	0.0441896	-0.161387	0.0821531	-0.123424	1	0.66141	0.850494	0.807643
Alg14	-0.0872182	-0.00829118	-0.141439	-0.0625116	1	0.992722	0.762339	0.933134
Alg2	-0.200439	-0.049541	-0.210331	-0.0594328	1	0.929008	0.53784	0.924271
Alg3	-0.0782917	-0.3749	0.233604	-0.0630043	1	0.201878	0.542404	0.930352
Alg5	0.17255	0.337156	-0.0124276	0.152179	1	0.363301	0.986782	0.813992
Alg6	0.104855	-0.208779	0.0831763	-0.230458	1	0.533215	0.850379	0.571432
Alg8	-0.171398	-0.245611	0.00183736	-0.0723754	1	0.454329	0.998571	0.903605
Alg9	-0.0451766	0.182016	-0.203342	0.0238511	1	0.530313	0.478279	0.968056
Alkbh1	0.118586	-0.205137	0.477423	0.1537	1	0.652602	0.139783	0.808257
Alkbh3	0.174545	-0.0632466	0.290776	0.052984	1	0.922961	0.43584	0.945283
Alkbh4	-0.0928223	0.174029	-0.17964	0.0872119	1	0.659353	0.644338	0.886022
Alkbh5	-0.18792	0.152872	-0.331226	0.00956575	1	0.591077	0.124616	0.988487
Alkbh7	-0.181943	-0.253735	-0.0393223	-0.111115	1	0.493609	0.949949	0.857495
Alkbh8	-0.0816804	-0.204333	0.150633	0.0279799	1	0.604952	0.733756	0.971613
Alms1	0.0108995	0.0369676	-0.140206	-0.114138	1	0.955558	0.749598	0.844711
Alpl	-0.107436	0.409658	-0.362992	0.154102	1	0.274373	0.367179	0.823564
Als2	0.0266359	0.360583	-0.478932	-0.144985	1	0.22325	0.08781	0.79498
Alyref	0.0852775	-0.102161	-0.0173306	-0.204769	1	0.740763	0.970054	0.477409
Ambra1	-0.103773	0.0382778	-0.0675991	0.0744515	1	0.947971	0.881178	0.89495
Amdhd2	-0.0200822	0.264386	0.2137	0.498168	1	0.300906	0.483405	0.0351698
Amer1	-0.275109	0.145002	-0.0561767	0.363934	1	0.775308	0.924567	0.403474
Amfr	-0.0609962	-0.387742	0.263982	-0.0627644	1	0.113525	0.392967	0.918155
Amigo3	-0.0724728	0.242126	-0.0884388	0.22616	1	0.622775	0.886401	0.720447
Ammecr1	-0.132621	-0.21516	-0.167774	-0.250313	1	0.449522	0.602602	0.462599
Ammecr1l	-0.113022	0.123287	-0.159646	0.076663	1	0.671852	0.557694	0.854155
Amot	-0.063399	0.481483	-0.521387	0.0234955	1	0.0796218	0.0730624	0.976104
Ampd2	0.0857393	-0.215782	0.691841	0.39032	1	0.591077	0.00785539	0.321299
Ampd3	-0.0903656	0.00437999	-0.0829819	0.0117637	1	0.993012	0.792634	0.983116
Amz2	0.116773	0.23282	-0.176858	-0.0608106	1	0.419905	0.594007	0.91429
Anapc1	-0.0320886	-0.0309634	-0.133228	-0.132103	1	0.953901	0.695052	0.759848
Anapc10	0.163977	-0.180653	0.163046	-0.181584	1	0.72877	0.749683	0.778333
Anapc11	0.117213	-0.0940992	-0.0143148	-0.225627	1	0.835375	0.979964	0.564311
Anapc13	0.00589179	0.305508	-0.32109	-0.0214736	1	0.141569	0.151138	0.97052
Anapc15	0.0469937	0.0644094	-0.15288	-0.135464	1	0.898535	0.674221	0.777825
Anapc16	-0.037553	-0.0551094	0.0268495	0.00929301	1	0.907417	0.957817	0.990232
Anapc2	-0.011995	0.195748	-0.239612	-0.0318686	1	0.44294	0.327005	0.953648
Anapc4	-0.0368539	-0.00464889	-0.0954525	-0.0632474	1	0.994069	0.843574	0.92877
Anapc5	-0.126568	-0.113842	-0.189686	-0.17696	1	0.536334	0.220337	0.359061
Anapc7	0.0201585	0.0739113	-0.083747	-0.0299942	1	0.86439	0.828582	0.961332
Angel2	-0.0663111	-0.169008	-0.0539273	-0.156624	1	0.49963	0.877564	0.636745
Ank	-0.047265	-0.0415242	-0.0538877	-0.0481469	1	0.94654	0.916895	0.943597
Ank1	-0.22344	0.166895	-0.308253	0.0820829	1	0.635191	0.272492	0.880884
Ankfy1	-0.134937	0.245616	-0.186113	0.194441	1	0.183329	0.404161	0.471673
Ankhd1	-0.0456505	0.0234004	-0.114321	-0.0452703	1	0.96341	0.756326	0.937209
Ankib1	-0.045541	0.0419964	-0.290175	-0.202638	1	0.935359	0.270299	0.590415
Ankle1	0.0394966	0.320223	0.0673312	0.348057	1	0.438142	0.915327	0.489108
Ankle2	-0.0746642	-0.0599357	-0.0677622	-0.0530337	1	0.88913	0.857416	0.918466
Ankra2	-0.0110078	-0.125837	0.174367	0.0595373	1	0.743379	0.608004	0.918592
Ankrd10	0.190906	-0.0754655	0.371373	0.105002	1	0.877037	0.161771	0.839507
Ankrd11	-0.0781976	-0.163348	0.111502	0.0263516	1	0.689477	0.801901	0.971883
Ankrd12	0.15494	-0.198462	0.127816	-0.225586	1	0.588709	0.762339	0.614071
Ankrd13a	-0.0711026	-0.0557105	-0.270395	-0.255003	1	0.866118	0.134334	0.245524
Ankrd13c	-0.10982	0.066126	-0.236021	-0.060075	1	0.873139	0.364618	0.901657
Ankrd17	-0.0788124	-0.0583618	-0.118484	-0.0980335	1	0.903519	0.74286	0.833951
Ankrd26	0.0824766	-0.313544	0.406426	0.0104051	1	0.251723	0.12289	0.990624
Ankrd27	-0.112467	-0.267908	0.122237	-0.0332036	1	0.265674	0.721579	0.954584
Ankrd28	0.110734	-0.00759039	-0.0165009	-0.134825	1	0.990761	0.974637	0.726592
Ankrd32	0.19709	-0.134465	0.0959494	-0.235606	1	0.753437	0.833221	0.582349
Ankrd40	0.0366446	-0.226346	0.0802418	-0.182749	1	0.119776	0.736487	0.390479
Ankrd46	-0.00599905	-0.151262	0.476147	0.330884	1	0.73004	0.089764	0.403474
Ankrd49	-0.0207031	-0.339283	0.0768023	-0.241778	1	0.212303	0.865008	0.5544
Ankrd52	-0.0647482	-0.0833132	-0.25575	-0.274315	1	0.875903	0.461094	0.513021
Ankrd54	0.0429506	0.0253445	-0.0850448	-0.102651	1	0.96341	0.843005	0.841499
Ankrd9	-0.17876	0.120949	-0.292475	0.00723399	1	0.732266	0.245554	0.993172
Anks1	0.0759234	0.290191	-0.123464	0.0908032	1	0.354729	0.778526	0.87969
Anks3	0.115114	0.196172	0.294874	0.375931	1	0.699861	0.486853	0.440164
Ankzf1	0.0610712	-0.126215	0.357149	0.169863	1	0.743373	0.165656	0.69081
Anln	0.017185	0.0874834	-0.0665752	0.00372312	1	0.816206	0.856526	0.997491
Ano1	0.087146	-0.400176	0.374476	-0.112846	1	0.317707	0.363115	0.887563
Ano6	-0.155915	0.441079	-0.453481	0.143513	1	0.225685	0.217647	0.840384
Anp32a	0.118248	-0.0922408	0.108505	-0.101984	1	0.844644	0.790647	0.845712
Anp32b	0.16298	0.0813284	0.0580444	-0.023607	1	0.86439	0.901022	0.972375
Anp32e	0.0271254	-0.00515765	-0.0682224	-0.100505	1	0.992722	0.843005	0.79841
Anxa7	-0.26343	0.189363	-0.3173	0.135493	1	0.455618	0.139079	0.714492
Aoc2	-0.0979899	0.099178	0.156268	0.353436	1	0.872036	0.754832	0.455794
Ap1ar	0.104207	-0.0852014	-0.00909187	-0.1985	1	0.774301	0.982216	0.44858
Ap1b1	0.0199089	0.126882	-0.0473179	0.0596549	1	0.727561	0.915305	0.913232
Ap1g1	-0.0587303	0.278498	-0.140513	0.196715	1	0.353767	0.7269	0.657173
Ap1g2	-0.111168	-0.102718	0.0133018	0.0217524	1	0.774301	0.97912	0.97052
Ap1m1	-0.0929981	-0.0734086	-0.1212	-0.10161	1	0.781469	0.582495	0.725003
Ap1s1	-0.0236361	0.130252	-0.229311	-0.0754225	1	0.732961	0.452104	0.890036
Ap2a1	0.0559209	-0.131357	-0.119363	-0.30664	1	0.544604	0.604615	0.0992087
Ap2a2	-0.178346	0.101098	-0.331299	-0.0518542	1	0.681632	0.0372741	0.889742
Ap2b1	-0.200874	0.0498803	-0.156668	0.0940869	1	0.917939	0.62656	0.840384
Ap2m1	0.0879452	-0.249738	0.116723	-0.22096	1	0.45704	0.790635	0.627647
Ap2s1	-0.0154678	0.278465	-0.254381	0.0395518	1	0.040205	0.116323	0.915155
Ap3b1	-0.0311334	0.0621716	0.0642496	0.157555	1	0.919744	0.905934	0.782183
Ap3d1	-0.128484	-0.00783352	-0.0301503	0.0905002	1	0.990761	0.950486	0.846123
Ap3m1	0.0744495	-0.110477	-0.0243242	-0.20925	1	0.798848	0.965616	0.615942
Ap3s1	0.202569	-0.0335379	0.200739	-0.0353682	1	0.966333	0.697648	0.970568
Ap3s2	-0.085633	-0.182601	0.0158008	-0.0811676	1	0.530313	0.975934	0.867329
Ap4b1	-0.121836	0.0646815	0.0223178	0.208836	1	0.882531	0.964476	0.550707
Ap4e1	-0.0589373	-0.234702	0.0682941	-0.107471	1	0.38418	0.864775	0.816738
Ap4m1	0.263394	0.125168	0.255291	0.117064	1	0.798848	0.490846	0.842544
Ap4s1	-0.0451758	0.135416	-0.140695	0.0398972	1	0.754322	0.735502	0.954584
Ap5m1	-0.0145551	-0.24592	0.151085	-0.0802802	1	0.372438	0.660668	0.878024
Ap5s1	-0.201335	0.201268	-0.37021	0.0323931	1	0.598392	0.222513	0.965977
Ap5z1	-0.034229	0.0316911	0.139344	0.205264	1	0.958515	0.735502	0.647627
Apaf1	0.0720737	0.0642049	-0.0316521	-0.0395209	1	0.894222	0.952073	0.948502
Apba3	0.0185762	-0.594212	0.491184	-0.121605	1	0.00283558	0.0450174	0.816738
Apbb1ip	0.175218	-0.0748921	0.0701264	-0.179984	1	0.912028	0.905934	0.771192
Apbb3	0.0618303	0.0115221	0.460143	0.409834	1	0.990868	0.185475	0.377001
Apc	-0.0605163	-0.052273	-0.0654334	-0.0571901	1	0.914551	0.872742	0.917971
Apeh	-0.0975643	0.230543	-0.257482	0.0706252	1	0.238287	0.196218	0.855069
Apex1	-0.106143	-0.0084069	-0.22435	-0.126614	1	0.992693	0.567559	0.830483
Apex2	-0.0164491	0.131954	-0.129953	0.0184504	1	0.633518	0.652322	0.972375
Aph1a	0.129452	-0.113954	0.0726176	-0.170789	1	0.830514	0.892406	0.762414
Api5	0.0809803	-0.0309555	-0.000939493	-0.112875	1	0.944533	0.998969	0.764148
Apip	0.0176402	-0.212874	0.173235	-0.0572799	1	0.559765	0.661951	0.933134
Apitd1	0.0869107	-0.185549	0.0392192	-0.23324	1	0.714844	0.955956	0.682455
Aplf	-0.0619431	-0.124983	0.237547	0.174507	1	0.711916	0.368597	0.641667
Aplp2	-0.027702	0.188186	-0.130942	0.0849461	1	0.352614	0.591647	0.809501
Apmap	0.21542	-0.154608	0.337312	-0.0327157	1	0.710953	0.267531	0.965349
Apoa1	-0.017148	0.216976	-0.060861	0.173263	1	0.526906	0.890213	0.714492
Apoa1bp	0.253014	-0.0403829	0.237744	-0.0556527	1	0.952079	0.527368	0.93686
Apobec3	0.149952	-0.0833045	0.234564	0.0013073	1	0.807891	0.301188	0.999689
Apoe	-0.0837882	0.578422	-0.243255	0.418955	1	0.0460595	0.56246	0.354239
Apol11b	0.0703096	0.867167	-0.636976	0.159882	1	0.000219842	0.0322071	0.801165
Apol8	-0.0636855	0.129754	-0.224866	-0.0314259	1	0.710117	0.420334	0.959563
Apold1	0.0234114	0.17102	-0.132262	0.015347	1	0.667827	0.757922	0.98416
Apool	-0.0125514	-0.119836	0.169481	0.0621965	1	0.75065	0.610749	0.910464
Apopt1	-0.019133	-0.36914	0.391412	0.041405	1	0.257258	0.240316	0.960651
App	0.266695	0.0113608	0.640149	0.384814	1	0.991539	0.0520981	0.457581
Appbp2	-0.149372	-0.213872	-0.147402	-0.211902	1	0.502772	0.691235	0.605476
Appl1	0.0179828	-0.403969	0.273929	-0.148023	1	0.21355	0.492052	0.816738
Aprt	-0.166815	0.236656	-0.431477	-0.0280064	1	0.591077	0.20964	0.974364
Aqp1	0.145236	-0.114705	0.230964	-0.0289774	1	0.86439	0.619355	0.975306
Aqp3	-0.213553	-0.179305	0.311038	0.345286	1	0.688333	0.381773	0.416711
Aqp9	-0.189555	0.0871077	0.0134441	0.290107	1	0.869434	0.982218	0.483156
Aqr	0.0657241	-0.0818739	0.106618	-0.0409804	1	0.86784	0.798281	0.950362
Araf	-0.093281	-0.110989	0.12262	0.104911	1	0.678371	0.639736	0.762834
Arcn1	0.00806224	-0.150676	-0.014907	-0.173645	1	0.590827	0.975934	0.607828
Arel1	-0.263638	0.143417	-0.20294	0.204115	1	0.719809	0.561637	0.640654
Arf1	0.0241956	-0.134231	0.0964359	-0.0619907	1	0.720611	0.807347	0.913232
Arf2	0.180049	0.170648	-0.0341316	-0.0435324	1	0.400724	0.918809	0.914721
Arf3	-0.13039	0.321108	-0.0693742	0.382124	1	0.228501	0.879373	0.232698
Arf4	-0.0672832	0.0459414	-0.00838657	0.104838	1	0.934487	0.989221	0.838789
Arf5	-0.0109267	0.234641	-0.18248	0.0630877	1	0.267503	0.464205	0.886022
Arf6	-0.0762621	-0.0189624	-0.118124	-0.060824	1	0.969257	0.740365	0.907216
Arfgap1	0.0587646	0.091613	-0.191951	-0.159103	1	0.816206	0.508008	0.677892
Arfgap2	0.0983347	-0.129604	0.151275	-0.0766628	1	0.585464	0.508964	0.825957
Arfgap3	-0.0381151	0.420249	-0.411973	0.0463904	1	0.127965	0.167785	0.949369
Arfgef1	0.0467117	-0.148104	0.120914	-0.0739017	1	0.641055	0.725809	0.880593
Arfgef2	-0.0338314	-0.0432339	-0.0998303	-0.109233	1	0.922961	0.761264	0.790712
Arfip1	-0.0595514	0.039477	0.0141768	0.113205	1	0.957877	0.984086	0.872621
Arfip2	0.12949	0.0254635	-0.088036	-0.192063	1	0.965456	0.84749	0.675287
Arfrp1	0.000272128	-0.108076	0.118299	0.00995168	1	0.798848	0.761264	0.990627
Arglu1	0.12663	-0.211882	0.148802	-0.18971	1	0.40825	0.625623	0.584787
Arhgap1	-0.235003	-0.00367259	-0.218133	0.0131972	1	0.993373	0.316327	0.980076
Arhgap10	0.0257498	0.0767466	-0.0281193	0.0228774	1	0.887876	0.963045	0.975148
Arhgap11a	-0.0596349	0.0998821	-0.183024	-0.023507	1	0.77225	0.502959	0.966291
Arhgap12	-0.0482547	-0.170909	0.188537	0.065882	1	0.656881	0.613893	0.917971
Arhgap17	-0.0645134	-0.201404	0.166964	0.0300741	1	0.388457	0.531008	0.954363
Arhgap19	-0.0878744	-0.0402532	-0.0905892	-0.042968	1	0.91868	0.757922	0.924392
Arhgap21	-0.149506	0.143856	-0.362039	-0.0686773	1	0.628705	0.0873275	0.884143
Arhgap23	-0.0512157	0.0587949	0.0308455	0.140856	1	0.904683	0.952244	0.749956
Arhgap33	0.067627	-0.105871	0.414121	0.240624	1	0.863377	0.239417	0.662548
Arhgap39	0.212928	-0.0409726	0.148399	-0.105502	1	0.955558	0.761935	0.87925
Arhgap4	0.126923	0.039058	0.700781	0.612916	1	0.955558	0.00932902	0.0547628
Arhgdia	-0.0771422	-0.0566462	-0.229122	-0.208626	1	0.827833	0.125904	0.256153
Arhgdib	0.0732834	0.851063	0.100975	0.878754	1	0.00214366	0.865879	0.00708315
Arhgdig	-0.201361	-0.421876	-0.110274	-0.330789	1	0.221795	0.843005	0.509414
Arhgef1	0.0660415	0.00283894	-0.0560325	-0.119235	1	0.993789	0.836633	0.648628
Arhgef12	-0.205536	0.226896	-0.640576	-0.208144	1	0.559669	0.0150758	0.679983
Arhgef18	-0.0397784	0.11193	-0.192296	-0.0405876	1	0.832417	0.6446	0.959563
Arhgef39	0.0766108	0.09992	0.344047	0.367356	1	0.853103	0.2867	0.343557
Arhgef40	0.422398	-0.0463662	0.556205	0.0874402	1	0.94822	0.0600511	0.900079
Arhgef7	-0.115767	0.0506637	-0.214278	-0.0478466	1	0.917899	0.463052	0.933275
Arid1a	-0.251263	-0.220578	0.00526266	0.0359481	1	0.389732	0.993277	0.947729
Arid1b	-0.10085	-0.194572	-0.000244083	-0.0939654	1	0.630131	0.999779	0.88252
Arid2	0.0231528	-0.0594194	0.00101366	-0.0815585	1	0.888433	0.998969	0.855069
Arid3a	-0.0969704	-0.195599	0.445816	0.347188	1	0.67157	0.173445	0.450976
Arid3b	-0.13599	0.0904744	-0.129901	0.096563	1	0.854784	0.749683	0.861168
Arid4a	-0.000768088	-0.00779129	0.00219985	-0.00482334	1	0.99098	0.998571	0.997281
Arid4b	-0.0134539	0.0948761	0.183192	0.291522	1	0.851821	0.629895	0.460761
Arih1	-0.179451	0.0289688	-0.15966	0.04876	1	0.939239	0.459359	0.89873
Arih2	-0.0151708	-0.0529041	0.0682991	0.0305658	1	0.861459	0.792634	0.938148
Arl1	0.178983	-0.156921	0.112654	-0.22325	1	0.742662	0.823688	0.664708
Arl13b	0.279589	-0.0424447	0.291296	-0.0307369	1	0.944594	0.372652	0.966291
Arl14ep	-0.145691	-0.941968	0.675302	-0.120974	1	0.000139534	0.0303688	0.870911
Arl15	0.125601	-0.207281	0.0804828	-0.252399	1	0.598626	0.872742	0.58882
Arl16	0.129018	-0.0576176	0.0310944	-0.155541	1	0.922961	0.959136	0.771192
Arl2	-0.0690962	-0.0932203	0.120482	0.0963584	1	0.822543	0.741197	0.840862
Arl2bp	-0.0194807	0.0137723	-0.325599	-0.292346	1	0.974191	0.0803716	0.205146
Arl3	-0.0586854	0.0851609	-0.228828	-0.0849817	1	0.860987	0.484492	0.879596
Arl4a	-0.124545	0.41325	-0.290056	0.247739	1	0.177948	0.43584	0.624901
Arl5a	-0.0384285	-0.0734006	-0.193235	-0.228208	1	0.828897	0.398277	0.386805
Arl5b	-0.133477	-0.19575	-0.076721	-0.138994	1	0.672289	0.892406	0.826935
Arl6ip1	-0.0694148	0.210569	-0.190335	0.0896493	1	0.427661	0.506602	0.842544
Arl6ip4	0.00509073	0.0235122	-0.111331	-0.0929092	1	0.960762	0.733756	0.825236
Arl6ip5	0.0216403	-0.103133	0.247905	0.123132	1	0.721747	0.232841	0.714492
Arl6ip6	0.188451	-0.15114	0.219541	-0.12005	1	0.617691	0.412055	0.775488
Arl8a	0.1728	-0.00313357	0.237953	0.0620194	1	0.99682	0.560621	0.934179
Arl8b	-0.00300756	-0.0947651	-0.107259	-0.199016	1	0.78712	0.74305	0.538174
Armc1	0.00162106	0.0548722	-0.154612	-0.101361	1	0.896548	0.591647	0.807643
Armc5	-0.186603	-0.0424056	-0.15139	-0.00719249	1	0.942675	0.700213	0.994801
Armc6	-0.118961	-0.0334335	-0.135111	-0.0495836	1	0.955654	0.739561	0.939001
Armc8	-0.00596178	0.143335	-0.14997	-0.000673769	1	0.613374	0.598287	0.999689
Armc9	0.382524	0.150253	0.0873274	-0.144943	1	0.7182	0.850622	0.78047
Armcx5	-0.0474032	0.0289696	-0.0461191	0.0302537	1	0.965465	0.941093	0.970586
Arnt	-0.157849	0.0354126	-0.113339	0.0799229	1	0.934487	0.697734	0.840384
Arpc1a	-0.531054	-0.509007	-0.0595467	-0.0374994	0.000574872	2.13e-05	0.840037	0.92954
Arpc1b	0.199572	1.11858	-0.397352	0.52166	1	1.23e-06	0.289378	0.2068
Arpc2	-0.0440082	-0.0253915	0.0948739	0.113491	1	0.947274	0.709214	0.701027
Arpc3	0.0372527	0.252044	-0.187801	0.0269902	1	0.259374	0.483405	0.963208
Arpc4	-0.11658	-0.0229143	-0.158541	-0.0648759	1	0.959462	0.557587	0.881
Arpc5	0.0590973	0.0830105	-0.0128696	0.0110436	1	0.849254	0.980438	0.987491
Arpc5l	0.0729605	-0.0463481	0.0695949	-0.0497138	1	0.912028	0.840693	0.916185
Arpp19	0.0155487	-0.0164697	-0.238017	-0.270035	1	0.972522	0.352548	0.359061
Arrb1	-0.253871	0.16955	-0.466837	-0.0434158	1	0.652217	0.0653651	0.947303
Arrb2	0.00292945	-0.045499	-0.101994	-0.150422	1	0.95406	0.857098	0.822941
Arrdc1	-0.035686	0.158556	0.204916	0.399158	1	0.722678	0.61115	0.288459
Arrdc2	0.0317432	0.372407	-0.0925721	0.248092	1	0.249485	0.858356	0.621918
Arrdc3	-0.0707198	0.35039	-0.0180262	0.403084	1	0.329431	0.979964	0.354546
Arsk	-0.253738	-0.265617	0.061005	0.0491258	1	0.45544	0.911468	0.947183
Art4	-0.336263	0.219082	-0.447862	0.107483	1	0.537893	0.0998379	0.849775
Artn	0.139575	0.0448528	0.0350248	-0.0596971	1	0.938624	0.950383	0.924619
Arvcf	0.298061	-0.257041	0.594238	0.0391367	1	0.386347	0.00963319	0.953625
Asah1	0.147282	0.388755	-0.164709	0.0767643	1	0.322038	0.757922	0.92954
Asap1	0.0143451	0.0852948	-0.152821	-0.0818716	1	0.806888	0.579296	0.842136
Asb1	-0.22921	0.407351	-0.582546	0.0540159	1	0.205762	0.0477776	0.945294
Asb17os	-0.0157982	-0.118658	0.150045	0.0471855	1	0.83844	0.760861	0.954584
Asb3	-0.016088	-0.00237071	0.0512121	0.0649294	1	0.996736	0.90029	0.893288
Asb6	0.174779	0.289696	-0.0737281	0.0411888	1	0.247644	0.856912	0.944796
Asb8	-0.127495	0.0812492	-0.219847	-0.0111024	1	0.851821	0.444586	0.987237
Ascc1	-0.0197255	-0.0321355	0.171818	0.159407	1	0.94822	0.563293	0.671233
Ascc2	-0.261554	0.165826	-0.285308	0.142072	1	0.630131	0.309899	0.761592
Ascc3	-0.126074	-0.0739042	-0.179197	-0.127027	1	0.869434	0.58	0.784065
Asf1a	0.103128	-0.101831	0.106313	-0.0986456	1	0.805893	0.782079	0.840384
Asf1b	0.0504433	0.0402075	0.0020813	-0.00815454	1	0.91868	0.99846	0.989409
Ash1l	0.0135904	-0.103281	0.216282	0.0994097	1	0.840509	0.566647	0.869565
Ash2l	0.00310413	-0.256619	0.270422	0.0106989	1	0.082931	0.100716	0.981057
Asl	-0.0470868	0.120486	-0.0951729	0.0724002	1	0.822543	0.852271	0.920959
Asna1	-0.0167031	0.105769	-0.2447	-0.122228	1	0.743373	0.291582	0.746547
Asns	-0.498114	-1.45758	0.685004	-0.274465	0.58971	1.37e-18	0.00286284	0.498263
Asnsd1	-0.0507515	-0.0330781	-0.232916	-0.215242	1	0.951229	0.397253	0.541156
Asph	0.0189384	-0.113979	0.169312	0.0363938	1	0.728113	0.557505	0.945556
Aspm	-0.0227337	0.245957	-0.160839	0.107851	1	0.259377	0.563293	0.787216
Aspscr1	-0.149023	-0.0620004	-0.0753415	0.011681	1	0.851821	0.792634	0.981057
Asrgl1	0.0502892	-0.0428092	-0.0853938	-0.178492	1	0.956766	0.88905	0.794075
Aste1	-0.0156459	0.00645027	-0.0147925	0.00730367	1	0.993789	0.984743	0.997281
Asun	-0.0778969	-0.00955676	-0.161271	-0.0929313	1	0.986414	0.56824	0.822941
Asxl1	-0.0858493	0.171486	-0.209362	0.0479735	1	0.548801	0.436582	0.92949
Asxl2	-0.0353396	-0.131373	0.0586721	-0.0373613	1	0.650564	0.868037	0.940566
Atad1	0.0793707	-0.033429	0.0698768	-0.0429229	1	0.953727	0.869395	0.944792
Atad2	0.106678	-0.0703295	0.0778525	-0.0991552	1	0.863492	0.833386	0.817546
Atad2b	-0.0187017	0.119584	-0.218074	-0.0797884	1	0.678989	0.347031	0.842445
Atad3a	-0.0380893	0.00949166	-0.0716759	-0.0240949	1	0.990634	0.877557	0.973158
Atad5	0.113359	-0.130048	0.0778943	-0.165513	1	0.602928	0.792634	0.564422
Ate1	0.0747261	-0.149993	-0.0575188	-0.282238	1	0.525282	0.856526	0.207828
Atf1	0.175952	0.110213	-0.0518272	-0.117566	1	0.749408	0.897527	0.777825
Atf2	0.0213544	0.00192417	-0.00670133	-0.0261315	1	0.996908	0.991105	0.965645
Atf4	-0.152904	-0.497042	0.392614	0.0484765	1	0.0221824	0.141002	0.939638
Atf5	-0.176512	-1.64738	1.32967	-0.141197	1	1.08e-14	5.08e-09	0.840384
Atf6	-0.127707	-0.0811384	0.0567439	0.103313	1	0.868236	0.905941	0.847535
Atf6b	-0.0964698	-0.110761	-0.0956097	-0.1099	1	0.658632	0.719578	0.725987
Atf7ip	-0.297861	0.137069	-0.297028	0.137902	1	0.70808	0.267531	0.761592
Atg101	-0.0176105	0.159253	-0.227209	-0.0503451	1	0.678989	0.502247	0.937444
Atg12	-0.145292	0.167634	-0.0340862	0.278839	1	0.598076	0.944631	0.391511
Atg13	-0.201581	0.0200509	-0.167633	0.0539982	1	0.969257	0.624667	0.92877
Atg14	-0.155593	0.364881	-0.331406	0.189068	1	0.294365	0.374515	0.748252
Atg16l1	0.0256222	0.0863035	0.0715663	0.132248	1	0.822883	0.849033	0.741362
Atg2a	-0.245197	0.0636161	-0.265723	0.0430903	1	0.898143	0.361529	0.944792
Atg2b	-0.0473752	0.103531	-0.0724278	0.0784784	1	0.809595	0.864775	0.886022
Atg3	-0.0362702	-0.155395	0.139156	0.0200308	1	0.590084	0.653575	0.972375
Atg4a	-0.075895	0.0951731	0.0579937	0.229062	1	0.867954	0.918809	0.648628
Atg4b	0.0219967	0.0842239	0.00841457	0.0706418	1	0.774301	0.982831	0.850213
Atg4d	-0.0998031	0.311597	-0.317948	0.0934522	1	0.120486	0.14261	0.823446
Atg5	0.0504216	-0.104167	0.00996014	-0.144629	1	0.816268	0.986712	0.764148
Atg7	-0.0718106	-0.0284677	-0.0321265	0.0112164	1	0.955075	0.942628	0.985949
Atg9a	-0.21548	0.236348	-0.0903682	0.36146	1	0.51338	0.850622	0.342122
Atic	-0.109135	-0.0705297	-0.25505	-0.216444	1	0.889425	0.413865	0.605476
Atl2	0.0469585	0.103365	-0.042614	0.0137926	1	0.664752	0.887119	0.975046
Atl3	0.0679156	-0.293931	0.159704	-0.202142	1	0.139185	0.567559	0.514969
Atm	0.0168651	-0.0533955	-0.240746	-0.311007	1	0.918819	0.432142	0.359061
Atmin	-0.172127	0.0374215	-0.340985	-0.131436	1	0.952831	0.250022	0.806727
Atox1	0.0490835	0.208545	-0.317491	-0.15803	1	0.33272	0.101471	0.61473
Atp11b	0.104658	0.00461528	0.136119	0.0360763	1	0.992722	0.583236	0.934906
Atp11c	0.0875257	0.0126401	-0.0684071	-0.143293	1	0.98061	0.850683	0.703055
Atp13a1	0.0137077	-0.0863121	0.0997438	-0.00027597	1	0.835772	0.78812	0.999689
Atp13a2	-0.0784709	0.429711	-0.151141	0.357041	1	0.269815	0.787447	0.511966
Atp13a3	-0.00602344	-0.337564	0.144312	-0.187228	1	0.12902	0.666657	0.624901
Atp1a1	0.0244252	-0.0695427	-0.075513	-0.169481	1	0.828107	0.793552	0.537983
Atp1b2	-0.216146	-0.420246	0.287792	0.0836929	1	0.0696413	0.3331	0.881
Atp1b3	0.0401173	0.0770923	-0.0609475	-0.0239725	1	0.77698	0.829516	0.955548
Atp2a2	0.0236593	-0.125166	-0.0621527	-0.210978	1	0.550448	0.814909	0.315614
Atp2b1	0.00506742	-0.0643227	-0.0897194	-0.15911	1	0.86439	0.778963	0.629806
Atp2b4	-0.221962	0.139794	-0.334148	0.0276078	1	0.711269	0.204472	0.966291
Atp2c1	0.0785195	-0.0365888	0.239594	0.124485	1	0.933464	0.291947	0.730023
Atp5a1	-0.0491534	0.0355009	-0.212444	-0.12779	1	0.925323	0.288009	0.673984
Atp5b	-0.1639	0.082278	-0.405586	-0.159407	1	0.831214	0.0489481	0.6627
Atp5c1	-0.0352858	-0.0133595	-0.198	-0.176073	1	0.981313	0.520247	0.656375
Atp5d	-0.163766	0.124219	-0.40741	-0.119425	1	0.50041	0.00070316	0.615942
Atp5e	-0.0591443	0.182744	-0.340057	-0.0981688	1	0.539725	0.151464	0.831051
Atp5f1	0.0591622	0.0755704	-0.138036	-0.121628	1	0.878574	0.725809	0.813624
Atp5g1	0.0529389	-0.0849894	-0.0961581	-0.234086	1	0.900608	0.864775	0.683989
Atp5g2	0.26562	-0.0176909	0.356541	0.0732299	1	0.984734	0.383689	0.934353
Atp5g3	-4.65e-05	0.180227	-0.255385	-0.0751118	1	0.58802	0.383425	0.890036
Atp5h	0.0857566	0.125971	-0.134589	-0.0943746	1	0.801542	0.766858	0.883696
Atp5j	0.118265	0.15644	-0.208031	-0.169855	1	0.601476	0.445688	0.645205
Atp5j2	-0.0555808	0.404469	-0.413779	0.0462707	1	0.0126355	0.0257574	0.924045
Atp5k	-0.0789405	0.312973	-0.360169	0.0317448	1	0.19476	0.141002	0.961045
Atp5l	0.335403	0.0834075	0.253389	0.00139321	1	0.898422	0.51682	0.999689
Atp5o	-0.0330738	0.0637142	-0.244523	-0.147735	1	0.868166	0.288498	0.67337
Atp5s	0.209873	-0.0427462	0.248819	-0.00379939	1	0.935359	0.392383	0.997913
Atp6ap1	-0.121682	0.0892836	-0.00211048	0.208855	1	0.805154	0.998571	0.507843
Atp6ap2	0.0515382	0.0766119	0.20824	0.233314	1	0.844644	0.426047	0.446394
Atp6v0a1	-0.175679	0.291949	-0.289618	0.17801	1	0.215267	0.253791	0.645113
Atp6v0a2	-0.116903	0.0229544	-0.286803	-0.146945	1	0.963356	0.255078	0.715481
Atp6v0b	-0.0609744	0.0847181	0.115141	0.260833	1	0.826287	0.729255	0.383175
Atp6v0c	-0.14682	-0.024554	-0.225798	-0.103532	1	0.969121	0.5641	0.869565
Atp6v0d1	-0.188209	0.165036	-0.261674	0.0915717	1	0.568444	0.284218	0.833951
Atp6v0e	0.0178312	-0.0694143	0.132332	0.0450866	1	0.838218	0.614636	0.920047
Atp6v1a	-0.0849195	0.0783205	-0.18592	-0.0226805	1	0.89375	0.658544	0.976386
Atp6v1b2	-0.157097	0.0683705	-0.171754	0.053714	1	0.854675	0.504591	0.902877
Atp6v1c1	0.0619411	0.0622331	-0.0914562	-0.0911642	1	0.865214	0.766369	0.816503
Atp6v1d	-0.0462349	0.154569	-0.132879	0.0679252	1	0.552035	0.636517	0.872621
Atp6v1e1	-0.10784	0.319899	-0.211286	0.216453	1	0.093308	0.39378	0.472593
Atp6v1f	0.0371952	0.159996	0.00627345	0.129074	1	0.586547	0.991142	0.748252
Atp6v1g1	0.133434	-0.0239078	0.159625	0.00228299	1	0.969257	0.713721	0.999361
Atp6v1h	-0.0189688	-0.153955	0.119763	-0.015224	1	0.750266	0.806857	0.986701
Atp7a	-0.129177	-0.0897981	-0.160266	-0.120887	1	0.881009	0.733756	0.852366
Atp7b	0.042269	-0.259797	0.169921	-0.132146	1	0.432107	0.667319	0.808712
Atp8a1	-0.0649104	-0.102063	0.137747	0.100593	1	0.754322	0.63333	0.804535
Atp9b	0.0535782	0.0599647	0.270965	0.277352	1	0.906432	0.351521	0.429093
Atpaf2	-0.0423172	-0.171559	-0.0341195	-0.163361	1	0.472049	0.928528	0.6042
Atpif1	-0.0726257	0.145789	-0.0964177	0.121997	1	0.62412	0.778537	0.762834
Atr	-0.190485	-0.264292	0.0858315	0.0120253	1	0.348099	0.840297	0.987237
Atraid	0.0844384	-0.345645	0.298779	-0.131304	1	0.256667	0.380401	0.819136
Atrip	0.192844	-0.0796619	0.0119013	-0.260604	1	0.869197	0.982831	0.489108
Atrn	0.0341639	-0.105716	0.048829	-0.0910507	1	0.806732	0.918228	0.86281
Atrnl1	-0.131351	-0.154482	-0.0811746	-0.104306	1	0.764412	0.885496	0.880884
Atrx	0.00538135	-0.162573	0.110522	-0.0574327	1	0.587285	0.74783	0.910408
Atxn1	0.106107	0.228155	0.180197	0.302245	1	0.546093	0.665407	0.476943
Atxn10	-0.0387692	0.207147	-0.14493	0.100987	1	0.588823	0.739671	0.86908
Atxn1l	0.0776606	0.105112	-0.203597	-0.176146	1	0.781803	0.492052	0.645693
Atxn2	-0.0606293	-0.0243903	0.065628	0.101867	1	0.958188	0.850622	0.799683
Atxn2l	-0.0571851	-0.212953	0.222528	0.0667599	1	0.427661	0.413865	0.89184
Atxn3	-0.134206	-0.135447	0.114525	0.113285	1	0.666594	0.733716	0.790767
Atxn7	0.103114	-0.218018	0.341507	0.0203754	1	0.531808	0.257777	0.976851
Atxn7l1	-0.191146	0.0175604	-0.0479446	0.160762	1	0.978424	0.926704	0.744928
Atxn7l3	-0.0231954	-0.154105	-0.0346523	-0.165562	1	0.508647	0.922757	0.565068
Atxn7l3b	-0.0186767	-0.124929	0.0941887	-0.0120635	1	0.613374	0.735755	0.980658
AU019823	0.11774	-0.00284204	0.109372	-0.0112096	1	0.996438	0.755695	0.986597
AU022252	-0.26163	0.229715	-0.485578	0.00576629	1	0.588709	0.123686	0.997491
AU040320	-0.147725	-0.186942	0.0148955	-0.0243213	1	0.546093	0.978342	0.970125
Auh	-0.115161	0.0579491	0.089776	0.262886	1	0.918819	0.846126	0.530416
Aup1	-0.12467	-0.000112815	-0.0458583	0.0786992	1	0.999941	0.912304	0.86838
Aurka	-0.0547972	0.0610049	-0.0668477	0.0489544	1	0.854784	0.824737	0.901211
Aurkaip1	-0.113936	0.0254417	-0.125576	0.0138018	1	0.955558	0.659272	0.979741
Aurkb	0.0131441	-0.0841222	0.0203389	-0.0769274	1	0.81103	0.963263	0.854842
Aven	0.0406696	-0.0671049	-0.209985	-0.31776	1	0.904993	0.567249	0.403434
Avl9	-0.0542128	0.132947	0.131994	0.319154	1	0.743379	0.742221	0.366765
AW011738	-0.691311	-0.278404	-0.0391966	0.37371	0.247732	0.525098	0.957817	0.44858
AW549877	0.114074	-0.0567764	0.487431	0.316581	1	0.931836	0.10932	0.478397
AW554918	-0.160492	-0.0148856	-0.133619	0.0119875	1	0.981908	0.755372	0.98953
Axin1	0.0289316	-0.0309254	-0.0371249	-0.0969819	1	0.928937	0.901022	0.741362
Azi2	0.113342	0.121516	-0.121594	-0.11342	1	0.659025	0.659909	0.74806
Azin1	-0.0564408	0.291326	-0.334293	0.0134739	1	0.16746	0.124616	0.98149
B230219D22Rik	0.157919	-0.159098	0.488419	0.171402	1	0.694722	0.0607929	0.725987
B2m	-0.303196	-0.19205	0.087443	0.198589	1	0.727531	0.887949	0.770326
B330016D10Rik	-0.161745	0.149875	-0.123198	0.188423	1	0.750371	0.794733	0.725136
B3galnt2	-0.0382538	-0.121328	0.215517	0.132443	1	0.717889	0.420334	0.741396
B3gat3	0.0883219	-0.0505961	0.0497319	-0.0891861	1	0.916336	0.907584	0.852366
B3glct	0.0476081	-0.491461	0.538682	-0.000387061	1	0.115425	0.0951656	0.999689
B3gnt3	-0.160151	-0.0187383	0.0978237	0.239237	1	0.979038	0.842788	0.615942
B4galt1	-0.0401106	-0.0218899	-0.0120982	0.00612251	1	0.955558	0.975934	0.992048
B4galt3	-0.0119195	0.118923	0.209014	0.339857	1	0.822165	0.610272	0.420984
B4galt5	-0.407462	0.0490624	-0.0637312	0.392794	1	0.952738	0.922757	0.432356
B9d2	0.0755711	0.0128114	-0.0745517	-0.137311	1	0.987928	0.892406	0.822941
Babam1	-0.118452	0.0751591	-0.258991	-0.0653798	1	0.771357	0.106799	0.838789
Bace1	-0.18544	0.0676923	-0.0680559	0.185077	1	0.917971	0.905934	0.750974
Bach1	-0.146426	0.208064	-0.339029	0.0154605	1	0.585887	0.281096	0.984914
Bad	-0.0408443	-0.178858	-0.0389177	-0.176931	1	0.692477	0.952244	0.757247
Bag1	-0.173017	0.17899	-0.316855	0.0351526	1	0.536334	0.175599	0.950362
Bag2	-0.0046675	0.0466373	-0.114755	-0.0634497	1	0.904993	0.681779	0.878024
Bag3	-0.14973	1.26818	-0.362608	1.0553	1	7.43e-10	0.317148	1.21e-05
Bag4	0.116784	-0.0341962	0.0533379	-0.0976428	1	0.945381	0.897267	0.825236
Bag5	0.102324	-0.258667	0.26245	-0.0985408	1	0.317816	0.33867	0.834337
Bag6	-0.101944	0.0962657	-0.316998	-0.118788	1	0.69429	0.042984	0.674729
Bahd1	-0.182753	-0.10408	-0.175837	-0.097163	1	0.672289	0.387338	0.76189
Bak1	0.0897904	0.106298	-0.123547	-0.10704	1	0.743935	0.687775	0.792287
Banf1	0.0209536	-0.0485119	0.0244039	-0.0450616	1	0.914598	0.959112	0.933134
Banp	-0.120173	-0.0890752	0.321963	0.353061	1	0.854784	0.267428	0.294707
Bap1	-0.0329509	0.14805	-0.114611	0.0663902	1	0.523573	0.661052	0.860338
Bard1	0.0298118	-0.0136945	0.082327	0.0388207	1	0.98099	0.839646	0.947374
Bax	0.0429258	0.28937	-0.146742	0.0997022	1	0.220765	0.656275	0.825321
Baz1a	0.0162227	-0.22516	-0.00992904	-0.251311	1	0.38418	0.9839	0.424051
Baz1b	0.00554055	-0.0549152	-0.0738612	-0.134317	1	0.869197	0.796239	0.648628
Baz2a	-0.221103	0.249359	-0.432931	0.0375315	1	0.33746	0.0477776	0.948281
Baz2b	0.0353285	-0.0684024	0.324543	0.220812	1	0.86966	0.162673	0.510419
Bbc3	0.0300046	0.092164	0.217038	0.279198	1	0.896286	0.647487	0.636132
Bbip1	0.00698325	-0.0647617	-0.0393456	-0.11109	1	0.890845	0.93295	0.816738
Bbs1	-0.0049446	0.131213	-0.0325824	0.103575	1	0.77698	0.958379	0.861687
Bbs2	0.303247	-0.203422	0.402568	-0.104102	1	0.590084	0.173129	0.859855
Bbs7	0.0145648	0.0213058	0.123962	0.130703	1	0.974191	0.790273	0.822941
Bbx	-0.124401	-0.258223	0.194921	0.0610994	1	0.585887	0.701283	0.944792
BC003331	-0.00967967	0.0172813	0.0464553	0.0734163	1	0.972522	0.914667	0.885062
BC003965	0.0434425	-0.153673	0.162542	-0.0345729	1	0.722678	0.695161	0.965307
BC004004	-0.0536879	-0.376789	0.31649	-0.00661168	1	0.146439	0.29164	0.996066
BC005537	-0.224288	0.0153278	-0.302543	-0.0629269	1	0.975762	0.188313	0.89687
BC005624	0.0982875	0.168854	0.0067842	0.0773503	1	0.587434	0.991105	0.877568
BC017158	0.0358497	0.120067	0.029645	0.113862	1	0.747304	0.954444	0.807643
BC017643	0.00772814	0.0738563	0.191505	0.257633	1	0.862717	0.519231	0.422339
BC018507	0.0042668	-0.170825	0.0544316	-0.12066	1	0.584579	0.898378	0.790712
BC021614	-0.131602	-0.457418	0.152933	-0.172883	1	0.184859	0.77238	0.797914
BC021767	0.11094	-0.0938684	0.0755312	-0.129278	1	0.89375	0.905934	0.861687
BC023829	-0.010694	-0.204092	0.0349153	-0.158483	1	0.625515	0.957817	0.787216
BC027231	-0.0973017	-0.131341	-0.0255562	-0.0595955	1	0.793683	0.970633	0.934906
BC030336	0.198813	-0.171367	0.212635	-0.157545	1	0.526347	0.410659	0.657173
BC030867	0.126762	0.654796	-0.508223	0.0198109	1	0.000212247	0.0239991	0.975306
BC031181	0.03352	0.102202	-0.114869	-0.0461875	1	0.811092	0.762679	0.939001
BC037034	-0.0409742	0.188266	0.0513623	0.280602	1	0.681632	0.932535	0.566054
BC052040	0.113043	-0.146101	0.145613	-0.113531	1	0.663512	0.666657	0.807392
BC053749	0.0233363	0.080489	0.196913	0.254066	1	0.897507	0.658269	0.62108
BC055324	0.209861	-0.0641606	0.00838751	-0.265634	1	0.872747	0.986712	0.35648
Bcap29	0.206513	-0.304782	0.350556	-0.160739	1	0.286256	0.218406	0.741362
Bcap31	0.0725896	0.104898	0.112756	0.145064	1	0.744389	0.71769	0.679017
Bcas2	0.110415	0.137831	-0.0889184	-0.0615021	1	0.597986	0.771566	0.885957
Bcas3	-0.333301	-0.0247269	-0.0882839	0.22029	1	0.96341	0.833511	0.57254
Bcat2	0.217664	-0.178822	0.589851	0.193365	1	0.713936	0.0477776	0.741396
Bccip	0.0327473	0.0469489	-0.292007	-0.277805	1	0.928937	0.283406	0.413
Bckdha	0.164557	-0.175988	0.354747	0.0142018	1	0.710117	0.313506	0.988336
Bckdk	0.00948755	-0.115438	-0.0120029	-0.136929	1	0.667827	0.977441	0.662991
Bcl10	0.0507838	0.104959	-0.0451658	0.00900915	1	0.820601	0.928956	0.992202
Bcl11a	-0.00405634	-0.825528	0.533415	-0.288056	1	1.95e-05	0.0400429	0.476943
Bcl2l1	-0.371234	0.409895	-0.555298	0.225831	1	0.183648	0.0554393	0.66291
Bcl2l11	0.0746458	-0.236773	0.286965	-0.0244536	1	0.545425	0.431563	0.975306
Bcl2l13	-0.187271	-0.000934903	-0.115197	0.0711387	1	0.997712	0.713273	0.872621
Bcl7a	0.00215803	-0.353802	0.340381	-0.0155787	1	0.224259	0.27828	0.98451
Bcl7b	0.0170493	-0.0138612	0.0230742	-0.00783631	1	0.976362	0.958836	0.990806
Bclaf1	0.110369	-0.09251	0.158201	-0.0446779	1	0.696816	0.417034	0.900079
Bcor	0.0302508	-0.423744	0.426393	-0.0276013	1	0.0178732	0.0372741	0.963865
Bcorl1	-0.123599	0.0556819	-0.326445	-0.147165	1	0.906432	0.173315	0.716676
Bcs1l	-0.172581	-0.115883	-0.203197	-0.146499	1	0.841718	0.646356	0.816738
Bdp1	-0.0232732	-0.159518	-0.0147991	-0.151044	1	0.643474	0.97912	0.733509
Becn1	-0.0065095	0.114834	0.0163919	0.137735	1	0.769705	0.975934	0.761592
Bet1	0.0334769	-0.00435597	0.0683961	0.0305633	1	0.994229	0.890597	0.966291
Bet1l	0.0205528	0.341581	-0.148135	0.172893	1	0.204309	0.708485	0.713327
Bex4	0.183682	-0.23372	0.40514	-0.0122622	1	0.643678	0.301188	0.992202
Bfar	0.0478175	-0.00592565	0.165942	0.112199	1	0.992935	0.620063	0.81586
Bicd2	-0.0918726	-0.0348346	-0.0405264	0.0165116	1	0.942665	0.922805	0.976666
Bin2	-0.178139	0.291453	-0.232886	0.236706	1	0.401844	0.557505	0.629787
Bin3	-0.193171	0.166895	-0.291708	0.0683577	1	0.580601	0.234743	0.890036
Birc2	0.195826	-0.0801103	0.44236	0.166424	1	0.883183	0.121587	0.751649
Birc5	0.11531	0.13152	0.0689418	0.0851518	1	0.708361	0.862621	0.859855
Birc6	-0.194743	0.122941	-0.291407	0.026277	1	0.698791	0.196218	0.965238
Blm	0.0343892	-0.0763049	-0.00477773	-0.115472	1	0.858826	0.993704	0.797476
Blmh	-0.0674479	-0.15466	-0.0543098	-0.141522	1	0.573579	0.881317	0.688225
Bloc1s1	0.028002	0.163101	-0.0874053	0.0476939	1	0.609486	0.826108	0.934103
Bloc1s3	-0.148146	0.0381528	-0.22423	-0.0379309	1	0.946346	0.478279	0.953648
Bloc1s4	-0.0721011	0.2717	-0.148501	0.1953	1	0.356352	0.701633	0.649751
Bloc1s5	0.0485883	-0.149004	0.182386	-0.015207	1	0.667827	0.576335	0.98149
Bloc1s6	-0.179562	-0.21721	-0.0822583	-0.119907	1	0.504359	0.850379	0.816738
Blvra	0.161942	0.00241366	0.00996078	-0.149567	1	0.99682	0.984454	0.714492
Blvrb	-0.106974	0.256029	-0.235631	0.127371	1	0.288301	0.372652	0.76186
Blzf1	-0.0254282	-0.0465749	-0.0703604	-0.0915071	1	0.934487	0.875241	0.868317
Bmi1	0.124624	-0.328255	0.445026	-0.00785332	1	0.398184	0.198945	0.996066
Bmp2k	-0.264334	0.0636077	-0.207778	0.120164	1	0.91133	0.56824	0.823628
Bms1	-0.0756154	-0.175096	-0.0158977	-0.115379	1	0.708361	0.981534	0.856113
Bnip1	-0.0247205	-0.0877163	0.0082646	-0.0547311	1	0.86439	0.991105	0.934906
Bnip2	0.164051	0.10532	-0.0281375	-0.0868685	1	0.67809	0.935837	0.797914
Bnip3	0.0379553	0.00426526	0.488027	0.454337	1	0.996438	0.131187	0.301803
Bnip3l	-0.0556728	0.299352	-0.230244	0.12478	1	0.297273	0.492616	0.812583
Bod1l	0.0100693	-0.0464106	-0.0282453	-0.0847252	1	0.91868	0.951978	0.850252
Bola1	-0.00845147	0.110535	-0.267302	-0.148315	1	0.814852	0.410358	0.772182
Bola2	-0.162941	0.0662593	-0.368766	-0.139565	1	0.8944	0.15564	0.771192
Bola3	-0.0596866	0.0181252	-0.143835	-0.0660235	1	0.969508	0.656275	0.89338
Bop1	-0.110922	-0.12275	-0.300822	-0.312651	1	0.792186	0.354183	0.428225
Bora	0.0165882	-0.109437	0.195295	0.0692692	1	0.771624	0.519098	0.890882
Bpgm	-0.163602	0.671023	-0.397848	0.436777	1	0.0157848	0.284992	0.327855
Bptf	-0.0964628	-0.0520897	-0.113571	-0.0691982	1	0.929378	0.792634	0.913232
Braf	-0.304341	-0.0287489	-0.26339	0.0122028	1	0.958569	0.357727	0.986597
Brap	-0.122469	0.0477455	-0.109254	0.0609602	1	0.917752	0.74783	0.901122
Brat1	-0.0379362	0.050436	-0.026248	0.0621242	1	0.938056	0.968429	0.931005
Brca1	0.115957	0.122175	-0.00920919	-0.00299175	1	0.649164	0.982218	0.997913
Brca2	-0.103676	-0.0990977	-0.244964	-0.240386	1	0.7952	0.358437	0.467991
Brcc3	-0.0171264	-0.0378286	-0.108424	-0.129126	1	0.939239	0.756972	0.759553
Brd1	0.0124229	0.130266	-0.00731831	0.110525	1	0.736892	0.991105	0.823446
Brd2	-0.00603753	-0.0291342	0.0110689	-0.0120278	1	0.956545	0.982322	0.985949
Brd3	0.0396914	-0.233952	0.409085	0.135442	1	0.457181	0.118414	0.78899
Brd4	-0.215066	0.0383428	-0.196299	0.0571104	1	0.943023	0.538846	0.920959
Brd7	0.0443142	-0.0519076	-0.0420083	-0.13823	1	0.878196	0.898378	0.644522
Brd8	0.115066	0.224291	0.128443	0.237669	1	0.397116	0.705032	0.473081
Brd9	-0.021238	0.0617387	-0.0299205	0.0530562	1	0.857184	0.9352	0.89687
Bre	-0.048634	-0.186568	-0.0637911	-0.201725	1	0.403687	0.844931	0.47057
Brf1	0.0873599	0.0663028	0.137597	0.11654	1	0.88913	0.704507	0.807643
Brf2	-0.0688415	0.0925421	-0.0183716	0.143012	1	0.867291	0.978342	0.807643
Bri3	0.0971785	-0.0852343	0.189528	0.00711537	1	0.888713	0.670279	0.996679
Bri3bp	-0.0287021	0.217814	0.166451	0.412968	1	0.660567	0.749683	0.387498
Brip1	0.081175	-0.13075	0.114866	-0.097059	1	0.696586	0.742221	0.830451
Brix1	0.0154999	-0.108517	-0.0246981	-0.148715	1	0.806997	0.965365	0.759778
Brk1	0.000849902	0.0805511	-0.0102723	0.069429	1	0.820423	0.981993	0.872621
Brms1	0.00940932	-0.275119	-0.00893279	-0.293461	1	0.22242	0.985652	0.301396
Brms1l	0.20844	-0.196774	0.210801	-0.194413	1	0.362095	0.347031	0.485477
Brox	0.260104	-0.0823346	0.279581	-0.062858	1	0.853103	0.301188	0.907236
Brpf1	0.138321	-0.0156536	0.189557	0.0355818	1	0.979038	0.565945	0.95486
Brpf3	-0.146949	0.113229	-0.204131	0.0560473	1	0.784782	0.54042	0.926719
Brwd3	0.031172	0.0580931	-0.189277	-0.162356	1	0.929541	0.661052	0.780828
Bscl2	0.0497091	-0.161562	0.0821456	-0.129125	1	0.661681	0.850622	0.797914
Bsdc1	-0.162493	0.464356	-0.323898	0.302951	1	0.138304	0.397415	0.545084
Bsg	-0.125722	0.271494	-0.241467	0.155748	1	0.158575	0.273551	0.631874
Bsn	0.06576	0.244694	0.0891861	0.26812	1	0.619042	0.886176	0.649751
Btaf1	-0.112028	-0.103782	-0.107703	-0.0994568	1	0.731912	0.716571	0.795096
Btbd1	0.323827	-0.0174888	0.1323	-0.209016	1	0.977132	0.740586	0.622755
Btbd10	0.203915	-0.065119	0.0697843	-0.19925	1	0.896816	0.872843	0.630331
Btbd2	0.100537	-0.266222	0.272046	-0.0947126	1	0.491651	0.483405	0.890036
Btbd7	-0.00402356	0.0313389	-0.0261145	0.00924802	1	0.960979	0.968429	0.993172
Btd	-0.0201514	0.227285	-0.0565994	0.190837	1	0.521624	0.914667	0.690777
Btf3	0.17609	-0.126604	0.218009	-0.0846847	1	0.831681	0.636517	0.913232
Btf3l4	0.0987126	-0.127211	0.189347	-0.0365767	1	0.851821	0.720606	0.97052
Btg1	0.0505998	0.0575885	0.260171	0.26716	1	0.92208	0.444905	0.53213
Btg2	-0.0643085	0.192935	-0.0656071	0.191636	1	0.568444	0.884897	0.648628
Btk	-0.124685	-0.0236392	-0.0932773	0.00776877	1	0.973683	0.862939	0.996066
Btn1a1	-0.037482	-0.233176	0.367126	0.171432	1	0.587434	0.301188	0.779819
Btnl10	-0.0635188	0.0834652	-0.149755	-0.00277099	1	0.887469	0.744804	0.999248
Btrc	-0.113865	0.258407	-0.225301	0.146971	1	0.38418	0.488858	0.760982
Bub1	0.0379374	0.136671	-0.102506	-0.003773	1	0.629093	0.745415	0.997491
Bub1b	-0.0413744	-0.0361985	-0.0570024	-0.0518264	1	0.927067	0.85715	0.899305
Bub3	0.0364826	-0.0199365	0.0491379	-0.00728118	1	0.959512	0.874161	0.990056
Bud13	0.0257799	-0.146879	-0.0439438	-0.216603	1	0.7182	0.932559	0.620621
Bud31	-0.192507	-0.225329	0.0795672	0.0467453	1	0.347262	0.823181	0.92877
Bysl	-0.0680435	-0.176094	-0.19744	-0.30549	1	0.556734	0.498855	0.301396
Bzrap1	0.0916157	0.351769	0.284495	0.544647	1	0.344262	0.491692	0.160419
Bzw1	0.0489653	-0.0965675	-0.0595936	-0.205126	1	0.846155	0.904166	0.647627
Bzw2	0.0519321	0.382862	-0.131208	0.199722	1	0.286013	0.802982	0.741396
C030046E11Rik	-0.144987	-0.221671	-0.048807	-0.125491	1	0.364698	0.901589	0.755967
C1d	0.109423	0.106469	-0.0242131	-0.0271677	1	0.811234	0.96616	0.968056
C1galt1	0.00116615	-0.155301	-0.0548889	-0.211356	1	0.710181	0.915367	0.645205
C1galt1c1	0.0227787	0.197236	-0.105671	0.0687859	1	0.555827	0.797914	0.902877
C1qbp	0.0397458	-0.147186	0.0150482	-0.171884	1	0.642493	0.975934	0.647627
C1qtnf4	-0.22154	-0.395542	0.0695695	-0.104432	1	0.294287	0.912304	0.890368
C230052I12Rik	-0.22727	0.102867	-0.281187	0.0489496	1	0.708361	0.131187	0.902877
C230091D08Rik	-0.172946	-0.310465	-0.0289111	-0.16643	1	0.288068	0.960116	0.735234
C2cd2l	-0.0548844	0.170132	-0.251968	-0.0269519	1	0.641523	0.426586	0.968927
C2cd3	-0.0837551	-0.010571	-0.0736395	-0.000455483	1	0.981908	0.823309	0.999689
C2cd5	-0.210359	0.182562	-0.250078	0.142843	1	0.564683	0.377819	0.744835
C330006A16Rik	-0.163697	0.11622	-0.15659	0.123327	1	0.693878	0.561528	0.730023
C330007P06Rik	0.119732	-0.12268	0.0654374	-0.176974	1	0.84155	0.91627	0.784994
C330018D20Rik	-0.168635	0.0401122	-0.169784	0.0389631	1	0.942579	0.626154	0.950665
C330027C09Rik	0.104338	0.319789	-0.268059	-0.0526087	1	0.119835	0.267531	0.917971
C530008M17Rik	0.0856682	-0.138284	0.139605	-0.0843471	1	0.733918	0.7269	0.884308
C78339	-0.0934202	-0.210093	0.0448727	-0.0718005	1	0.505358	0.926557	0.897376
C87436	-0.123041	-0.040075	-0.0485897	0.0343768	1	0.953708	0.932048	0.965927
Caap1	0.0309332	-0.0978012	-0.0071437	-0.135878	1	0.845204	0.992315	0.79841
Cab39	0.0503361	-0.000253906	0.034528	-0.016062	1	0.9991	0.924138	0.974364
Cab39l	0.0094569	-0.0275722	-0.0899922	-0.127021	1	0.959512	0.825192	0.787216
Cabin1	-0.0895635	0.0438118	0.0371272	0.170502	1	0.934487	0.940358	0.683989
Cables2	0.115798	-0.270902	0.0734958	-0.313204	1	0.272929	0.851017	0.289924
Cachd1	-0.0782945	0.218516	-0.12878	0.16803	1	0.631196	0.804514	0.792491
Cacna1g	0.104966	0.552167	-0.246674	0.200528	1	0.0659295	0.579591	0.744722
Cactin	0.0686342	-0.0296644	-0.110589	-0.208887	1	0.933719	0.630503	0.32811
Cacul1	0.16914	0.147879	0.0898769	0.068615	1	0.618963	0.797914	0.886022
Cacybp	0.163204	0.301799	-0.0402852	0.09831	1	0.397109	0.950379	0.88252
Cad	-0.122506	-0.103633	-0.24594	-0.227067	1	0.851616	0.519231	0.645693
Cadm3	-0.129325	0.323384	-0.0430801	0.409629	1	0.466809	0.954628	0.424051
Calcoco1	-0.322045	0.12712	-0.105889	0.343276	1	0.831214	0.850379	0.485214
Calm1	-0.0695134	0.00541007	-0.268073	-0.193149	1	0.991549	0.126525	0.424051
Calm2	0.136459	0.0882673	0.074733	0.0265408	1	0.862068	0.872732	0.97052
Calm3	-0.132097	0.148182	-0.233231	0.0470474	1	0.585887	0.309127	0.923866
Calr	-0.164141	0.15045	-0.343501	-0.0289092	1	0.568444	0.0777724	0.954711
Calu	-0.065756	-0.137843	-0.0138496	-0.0859363	1	0.39607	0.964476	0.733509
Camk2g	0.0279444	-0.0519564	0.037351	-0.0425498	1	0.929378	0.94775	0.950776
Camkk2	0.0149152	-0.141468	0.0324207	-0.123963	1	0.744389	0.957817	0.8215
Caml	-0.0178567	0.0256715	8.38e-05	0.0436119	1	0.968073	0.999779	0.954584
Camsap1	-0.0157038	0.0903014	-0.0568629	0.0491423	1	0.843437	0.901046	0.934906
Camsap2	-0.0275607	-0.100045	-0.118229	-0.190714	1	0.740511	0.67587	0.510653
Camta1	0.136329	0.0511403	0.339194	0.254005	1	0.944735	0.382886	0.647014
Camta2	0.0653195	-0.104104	0.273142	0.103719	1	0.879122	0.558466	0.896505
Cand1	-0.0833071	-0.0994735	-0.157915	-0.174081	1	0.817476	0.652322	0.677976
Cant1	0.0549386	-0.126464	0.0714576	-0.109945	1	0.691005	0.846853	0.794381
Canx	-0.058585	0.0155109	-0.162834	-0.0887381	1	0.968239	0.483405	0.805867
Cap1	-0.0262832	0.133007	-0.0653532	0.0939374	1	0.642019	0.850683	0.816738
Capn1	-0.151022	0.0577687	-0.394585	-0.185795	1	0.878196	0.0334346	0.53938
Capn15	-0.0894217	0.071431	-0.194462	-0.0336094	1	0.902704	0.62006	0.965645
Capn5	-0.181634	0.0648703	-0.22793	0.0185739	1	0.897526	0.466677	0.976874
Capn7	0.0506878	0.162155	-0.0259546	0.0855126	1	0.553356	0.954628	0.840384
Capns1	-0.00159889	0.277579	-0.265425	0.0137527	1	0.111517	0.171974	0.976874
Caprin1	-0.0556271	-0.124723	-0.072981	-0.142077	1	0.578228	0.786276	0.593275
Caprin2	-0.0203466	-0.371574	0.212073	-0.139154	1	0.16746	0.56246	0.79553
Capza1	0.194542	-0.0745106	0.168736	-0.100317	1	0.912028	0.7269	0.887626
Capza2	0.0746906	0.0861843	-0.00910456	0.00238913	1	0.81835	0.984794	0.998968
Capzb	0.110541	0.0939251	-0.0263338	-0.0429501	1	0.820601	0.959112	0.940566
Car1	0.165374	0.0517014	0.896322	0.78265	1	0.943023	0.00052922	0.00722666
Car2	-0.100309	0.412244	-0.40356	0.108992	1	0.0184188	0.0447237	0.792287
Carhsp1	0.023778	0.336157	-0.21548	0.0968986	1	0.193655	0.516131	0.855069
Carkd	-0.0026839	-0.163184	0.131901	-0.028599	1	0.590084	0.695161	0.963865
Carm1	-0.141986	0.112558	-0.372335	-0.117791	1	0.77698	0.131738	0.807392
Cars	-0.0707594	-0.505858	0.352916	-0.0821827	1	0.00147375	0.0899372	0.850213
Cars2	0.0557122	0.0730106	-0.153376	-0.136078	1	0.886201	0.689508	0.78899
Casc3	-0.0195392	0.062947	-0.0205542	0.061932	1	0.869197	0.963263	0.890036
Casc5	-0.0827393	-0.0733787	-0.158193	-0.148832	1	0.855437	0.59052	0.687985
Casd1	-0.0395755	-0.0436772	0.0610996	0.0569978	1	0.94822	0.911703	0.93686
Caskin2	0.0104961	0.283688	-0.199395	0.0737977	1	0.317228	0.56246	0.89687
Casp2	0.0054872	-0.0399932	0.0408155	-0.0046649	1	0.913709	0.901022	0.995047
Casp3	0.166766	0.421869	-0.0813067	0.173797	1	0.120406	0.867879	0.739792
Casp6	0.320619	0.219372	0.141587	0.0403402	1	0.641474	0.788254	0.965307
Casp7	-0.00472734	-0.238416	0.0112698	-0.222419	1	0.455606	0.984581	0.599516
Casp8	0.0516805	-0.0694961	-0.0269252	-0.148102	1	0.91422	0.969454	0.808257
Casp8ap2	0.0938441	-0.19636	-0.0131979	-0.303402	1	0.555179	0.981534	0.387498
Casp9	-0.00815451	-0.129325	-0.0629759	-0.184147	1	0.679642	0.864775	0.590415
Cast	0.0443095	-0.0918237	0.0289248	-0.107208	1	0.826287	0.954628	0.817571
Cat	-0.300138	0.357096	-0.337991	0.319243	1	0.22919	0.288947	0.431936
Cbfa2t2	0.0120584	0.0738656	-0.0406292	0.021178	1	0.87059	0.932168	0.974364
Cbfa2t3	-0.338351	0.242409	-0.107701	0.473059	1	0.458165	0.803634	0.119382
Cbl	-0.0964392	-0.0943294	-0.229619	-0.227509	1	0.881019	0.603152	0.686057
Cblb	-0.012369	0.0321055	0.0122536	0.0567281	1	0.962721	0.986326	0.940566
Cbll1	0.117902	0.211905	0.00424635	0.0982496	1	0.492592	0.996219	0.845712
Cbr1	-0.0130705	-0.0112622	0.227119	0.228927	1	0.989803	0.57471	0.648628
Cbwd1	0.0200947	-0.182756	-0.000232399	-0.203083	1	0.598076	0.999779	0.635489
Cbx1	0.124441	-0.0701247	0.126983	-0.0675835	1	0.869782	0.712795	0.892802
Cbx3	0.339007	-0.00886222	0.221419	-0.12645	1	0.992722	0.625412	0.853815
Cbx5	-0.0928961	-0.134259	-0.14115	-0.182513	1	0.7182	0.694044	0.649751
Cbx6	0.219192	-0.277558	0.38174	-0.11501	1	0.416647	0.212596	0.845496
Cbx7	-0.0126665	0.144598	0.348407	0.505671	1	0.803864	0.377074	0.228516
Cby1	0.133371	0.0698189	0.0308194	-0.0327328	1	0.904199	0.959504	0.965977
Cc2d1a	0.0137222	0.106983	-0.133381	-0.0401196	1	0.844644	0.775532	0.960077
Cc2d1b	0.0545433	0.126377	0.079774	0.151607	1	0.750371	0.852271	0.741396
Ccar1	0.0343245	-0.0533101	-0.0322081	-0.119843	1	0.837476	0.904245	0.607336
Ccar2	-0.0306444	0.18382	-0.183285	0.0311788	1	0.578172	0.583843	0.963865
Ccbl1	-0.0693646	-0.425139	0.390317	0.0345426	1	0.16076	0.248579	0.966291
Ccdc101	0.0877354	-0.292099	0.248249	-0.131586	1	0.29489	0.429638	0.794004
Ccdc104	-0.0527914	0.223555	-0.224491	0.0518547	1	0.427661	0.440124	0.92877
Ccdc107	-0.142582	-0.37426	0.328454	0.0967767	1	0.203802	0.317436	0.878207
Ccdc109b	-0.0185431	-0.192981	-0.114319	-0.288757	1	0.720366	0.839807	0.61473
Ccdc115	0.209434	-0.0850696	0.230843	-0.0636612	1	0.892297	0.586374	0.934906
Ccdc117	-0.0320237	0.192639	-0.233308	-0.00864497	1	0.50198	0.390774	0.99131
Ccdc12	0.0883636	0.077096	0.0550245	0.043757	1	0.877548	0.911468	0.946828
Ccdc124	-0.045844	0.161182	-0.315637	-0.108611	1	0.440139	0.0600511	0.725987
Ccdc127	-0.082499	-0.0966014	-0.0628807	-0.0769831	1	0.826132	0.887119	0.887626
Ccdc130	-0.0326479	0.102457	0.0639022	0.199007	1	0.841024	0.901562	0.679017
Ccdc132	0.0373354	0.176209	-0.104092	0.0347815	1	0.622154	0.803844	0.960515
Ccdc134	0.143432	-0.0289227	0.0740079	-0.0983472	1	0.959462	0.864775	0.849988
Ccdc137	0.0753102	-0.11887	0.153726	-0.0404536	1	0.795988	0.705032	0.954584
Ccdc14	0.0472527	0.139215	-0.235238	-0.143276	1	0.777959	0.560067	0.810244
Ccdc15	-0.0908021	-0.414335	0.0683897	-0.255143	1	0.280323	0.917192	0.674877
Ccdc163	0.00496377	-0.257461	0.41151	0.149085	1	0.474488	0.179406	0.797801
Ccdc167	0.165524	0.0885049	0.0917829	0.014764	1	0.844644	0.823978	0.982848
Ccdc174	0.0807081	0.0762097	-0.0745509	-0.0790493	1	0.868724	0.859153	0.882538
Ccdc18	0.0464936	-0.106658	0.0725749	-0.0805771	1	0.851239	0.894966	0.906834
Ccdc22	0.00293987	0.0730969	-0.262776	-0.192619	1	0.83844	0.224397	0.517535
Ccdc23	-0.0233093	0.276533	-0.18483	0.115012	1	0.307263	0.579599	0.81586
Ccdc25	0.144517	0.296787	-0.206112	-0.0538414	1	0.0472706	0.292995	0.887563
Ccdc32	0.29534	0.23616	-0.047199	-0.106379	1	0.563519	0.938784	0.872621
Ccdc34	0.143771	-0.023148	0.131261	-0.0356575	1	0.969257	0.761614	0.963769
Ccdc43	-0.0627153	-0.0185349	-0.280017	-0.235837	1	0.975817	0.368399	0.566618
Ccdc47	0.0416092	0.00330585	0.0500351	0.0117317	1	0.994569	0.901022	0.985109
Ccdc50	-0.089591	-0.0979136	-0.0594277	-0.0677503	1	0.820423	0.892974	0.901122
Ccdc51	0.0495783	-0.0954999	-0.129369	-0.274447	1	0.83844	0.746343	0.468842
Ccdc53	-0.0174574	0.080142	-0.181729	-0.0841299	1	0.89298	0.67195	0.900079
Ccdc55	0.031467	-3.07e-05	0.0247173	-0.00678045	1	0.999941	0.967869	0.995905
Ccdc59	0.0163552	-0.207495	0.0712958	-0.152554	1	0.612499	0.894841	0.794381
Ccdc6	0.0570169	-0.066002	0.0921142	-0.0309047	1	0.916768	0.856833	0.96961
Ccdc61	0.0633047	0.140718	0.0761278	0.153541	1	0.73004	0.867879	0.757389
Ccdc66	-0.108875	-0.401464	0.217009	-0.0755802	1	0.134001	0.56204	0.9035
Ccdc71	-0.0881789	-0.158458	-0.0311664	-0.101445	1	0.643474	0.95328	0.835711
Ccdc71l	-0.310712	-0.041742	-0.245809	0.0231608	1	0.923846	0.285369	0.965977
Ccdc77	-0.088079	0.0495535	0.102523	0.240155	1	0.930542	0.811084	0.554258
Ccdc82	0.170622	-0.244508	0.222051	-0.19308	1	0.309996	0.398277	0.575643
Ccdc84	0.231724	-0.047668	0.257424	-0.0219678	1	0.939239	0.46571	0.976104
Ccdc85b	-0.197067	-0.0337857	-0.0284818	0.134799	1	0.957926	0.962958	0.811886
Ccdc86	-0.0343911	-0.099711	-0.125202	-0.190522	1	0.866667	0.802982	0.741396
Ccdc88a	-0.211584	-0.0869738	-0.159109	-0.0344993	1	0.888592	0.740586	0.966781
Ccdc88c	0.0844289	0.251701	-0.0413466	0.125925	1	0.525282	0.949326	0.840384
Ccdc9	0.0817818	-0.113579	0.245861	0.0505006	1	0.694722	0.260307	0.911382
Ccdc90b	0.0136207	0.0425214	0.0115038	0.0404045	1	0.934689	0.982218	0.94606
Ccdc93	0.109856	-0.123351	0.0733567	-0.159851	1	0.829487	0.900053	0.798999
Ccdc97	-0.0732759	0.0963438	-0.107214	0.0624058	1	0.77024	0.731827	0.890036
Cchcr1	0.141944	0.0046505	0.116605	-0.0206887	1	0.994069	0.800153	0.978295
Ccm2	-0.0452703	-0.126107	-0.173422	-0.254259	1	0.600726	0.429282	0.256153
Ccna2	0.00479469	0.206667	-0.236522	-0.0346489	1	0.334004	0.267531	0.940566
Ccnb1	0.184814	-0.0717534	0.0604666	-0.196101	1	0.911183	0.916122	0.719162
Ccnb2	-0.0362182	0.0723448	0.0465909	0.155154	1	0.848763	0.901562	0.647741
Ccnc	0.0104659	0.0794961	-0.0637558	0.0052744	1	0.795988	0.840044	0.994544
Ccnd2	-0.248234	-0.217374	0.140649	0.171509	1	0.664045	0.795303	0.803043
Ccnd3	0.0154342	-0.00688121	-0.0820564	-0.104372	1	0.989957	0.786276	0.770717
Ccndbp1	-0.0637143	0.363538	-0.131803	0.29545	1	0.158575	0.744804	0.427407
Ccne1	0.196567	-0.138678	0.0901829	-0.245062	1	0.547198	0.742368	0.272727
Ccne2	0.165162	0.00171572	-0.101838	-0.265284	1	0.996908	0.762679	0.371523
Ccnf	-0.0299544	-0.0545434	-0.115955	-0.140544	1	0.886389	0.687824	0.674877
Ccng1	-0.0474425	0.00757279	-0.120397	-0.0653818	1	0.992722	0.788254	0.924045
Ccng2	-0.300699	0.147162	-0.0339165	0.413945	1	0.70243	0.950486	0.179143
Ccnh	0.080834	-0.0624321	0.043736	-0.0995302	1	0.912226	0.935596	0.861687
Ccni	-0.0223771	0.0217862	-0.0429232	0.00124001	1	0.967656	0.928385	0.999689
Ccnj	0.00748558	0.0873845	-0.290809	-0.21091	1	0.863734	0.360723	0.641667
Ccnk	-0.10864	0.0622238	-0.228736	-0.057872	1	0.857184	0.267531	0.887563
Ccnl1	0.214425	0.0572033	0.429288	0.272066	1	0.929341	0.161393	0.553337
Ccnl2	0.129874	-0.0747323	0.507933	0.303327	1	0.907637	0.0959065	0.516481
Ccnt1	-0.10936	-0.00834982	-0.110797	-0.0097869	1	0.992722	0.838793	0.993813
Ccnt2	0.0309029	0.0729409	0.133551	0.175589	1	0.869434	0.705265	0.65722
Ccny	-0.0143215	-0.0650291	0.0223761	-0.0283315	1	0.854784	0.957817	0.954584
Ccp110	0.138095	0.195422	-0.221504	-0.164176	1	0.455408	0.388483	0.646336
Ccpg1	-0.238378	-0.0192515	-0.0261093	0.193018	1	0.978413	0.968429	0.710964
Ccrl2	-0.0676268	0.360777	-0.136051	0.292352	1	0.246767	0.766369	0.510653
Ccrn4l	-0.225614	-0.116604	-0.11424	-0.00522942	1	0.684907	0.694044	0.994858
Ccs	-0.107366	0.284365	-0.263033	0.128698	1	0.355132	0.424838	0.811644
Ccsap	0.0912972	-0.0700882	0.194555	0.0331694	1	0.900972	0.610814	0.965349
Cct2	-0.0204453	-0.130818	-0.023286	-0.133659	1	0.724466	0.964924	0.771034
Cct3	0.0187024	0.206228	-0.281621	-0.0940945	1	0.472049	0.281399	0.842445
Cct4	0.000407574	-0.121621	-0.050434	-0.172463	1	0.687271	0.892323	0.600873
Cct5	-0.0482524	0.0140247	-0.211994	-0.149717	1	0.974191	0.347031	0.643651
Cct6a	0.00583411	0.16594	-0.202439	-0.0423323	1	0.625515	0.530745	0.944895
Cct7	-0.0384187	0.195243	-0.268563	-0.0349016	1	0.518424	0.323655	0.954584
Cct8	-0.00192019	0.103923	-0.208105	-0.102261	1	0.731912	0.372652	0.78899
Ccz1	0.454754	0.482043	-0.170981	-0.143692	0.012197	7.1e-05	0.413865	0.595808
Cd151	0.0902314	0.272916	-0.0336409	0.149043	1	0.372972	0.954444	0.769888
Cd164	-0.064403	-0.114334	0.0292097	-0.0207214	1	0.720611	0.946793	0.97052
Cd24a	-0.0286242	0.130932	-0.314754	-0.155198	1	0.725252	0.231425	0.716676
Cd2ap	0.0518262	-0.228152	0.0365279	-0.243451	1	0.512859	0.950379	0.571432
Cd2bp2	0.10612	0.0964042	-0.00393048	-0.0136462	1	0.731481	0.993521	0.976818
Cd36	0.0716014	0.247769	-0.0457359	0.130432	1	0.568452	0.941093	0.844999
Cd3eap	0.103982	-0.208667	0.000729812	-0.311919	1	0.632126	0.999513	0.503453
Cd44	0.0335959	0.0167492	0.166833	0.149986	1	0.984734	0.747408	0.825236
Cd47	-0.0710021	0.299471	-0.133064	0.237409	1	0.158069	0.671801	0.445559
Cd55	-0.0197537	0.0490782	0.188816	0.257648	1	0.934487	0.612969	0.534819
Cd59a	-0.0509864	-0.0289909	0.251332	0.273327	1	0.955558	0.33867	0.377413
Cd81	0.0665276	-0.0284419	0.439474	0.344504	1	0.967354	0.179119	0.450976
Cd82	-0.0967313	0.36175	-0.502711	-0.0442297	1	0.227468	0.0708913	0.95238
Cd99l2	-0.0496962	-0.253939	0.266221	0.0619778	1	0.352614	0.342421	0.911996
Cdadc1	0.0877502	0.109257	0.0668483	0.0883546	1	0.746054	0.857416	0.839604
Cdan1	0.144916	0.109146	0.0940172	0.0582467	1	0.742471	0.782079	0.901122
Cdc123	0.131614	-0.00147491	0.0336537	-0.0994354	1	0.996908	0.929194	0.794508
Cdc14a	0.0335611	0.112011	-0.0308805	0.0475691	1	0.825005	0.959789	0.947183
Cdc16	0.131004	-0.0390035	0.126661	-0.0433465	1	0.938946	0.713194	0.938148
Cdc20	0.0353174	-0.16335	0.100351	-0.0983158	1	0.474527	0.723052	0.784149
Cdc23	0.0438966	-0.213872	0.172489	-0.0852798	1	0.190255	0.376099	0.787216
Cdc25a	0.0763593	-0.170107	0.0065805	-0.239886	1	0.31834	0.984794	0.201288
Cdc25b	-0.180909	0.1343	-0.302714	0.0124938	1	0.720787	0.264732	0.986121
Cdc25c	-0.00448718	0.0139645	0.00177462	0.0202263	1	0.974462	0.998571	0.96836
Cdc26	-0.00949976	-0.0146798	0.14985	0.14467	1	0.981974	0.716316	0.786621
Cdc27	0.000704597	-0.0375956	-0.0314435	-0.0697437	1	0.93992	0.946968	0.888384
Cdc34	-0.0314357	0.0330818	-0.282009	-0.217492	1	0.938624	0.161015	0.424051
Cdc37	0.0208781	-0.171253	-0.0693625	-0.261494	1	0.267145	0.760508	0.107988
Cdc37l1	-0.04891	-0.00918645	-0.088942	-0.0492185	1	0.985011	0.76781	0.91208
Cdc40	-0.0460316	0.0205538	-0.120671	-0.0540853	1	0.959172	0.627439	0.890036
Cdc42	-0.0265448	0.00709545	-0.0525418	-0.0189016	1	0.992722	0.916122	0.978295
Cdc42bpa	-0.163486	-0.216031	-0.095046	-0.14759	1	0.232992	0.719578	0.595808
Cdc42bpg	0.106275	0.00648847	0.240588	0.140801	1	0.993012	0.557409	0.816738
Cdc42ep3	0.0156307	-0.118195	0.06298	-0.0708454	1	0.704178	0.858869	0.872621
Cdc42ep4	-0.0142736	-0.0551158	0.0120738	-0.0287684	1	0.929556	0.984794	0.97052
Cdc42se1	-0.0389714	-0.23607	0.177756	-0.0193426	1	0.347137	0.553649	0.974364
Cdc42se2	0.0745792	-0.256738	0.0516082	-0.279709	1	0.273937	0.898378	0.340187
Cdc45	0.201304	-0.0309471	0.23792	0.00566892	1	0.936384	0.211665	0.993172
Cdc5l	0.0521443	0.0623143	-0.134066	-0.123896	1	0.897526	0.710795	0.792287
Cdc6	0.218301	-0.167518	0.0426027	-0.343216	1	0.506136	0.909323	0.128075
Cdc7	0.0949986	-0.0197491	0.271091	0.156343	1	0.969257	0.330213	0.714492
Cdc73	0.0296715	-0.151402	-0.0370062	-0.21808	1	0.574257	0.924008	0.453047
Cdca2	0.0235374	0.021705	-0.0625509	-0.0643833	1	0.966638	0.880076	0.901122
Cdca3	0.0459699	0.0578249	0.0159311	0.0277861	1	0.89298	0.975398	0.963237
Cdca4	0.12097	-0.116486	0.213608	-0.0238475	1	0.787468	0.532358	0.972816
Cdca5	0.119134	0.146359	-0.0602893	-0.0330644	1	0.613865	0.869311	0.950486
Cdca7	0.02679	-0.104164	0.198981	0.0680268	1	0.846155	0.619355	0.923866
Cdca7l	-0.034762	-0.202697	0.0603718	-0.107563	1	0.596821	0.907876	0.855069
Cdca8	0.0173038	0.0995533	-0.0660367	0.0162129	1	0.666594	0.798604	0.97025
Cdip1	-0.201842	-0.150247	-0.0684866	-0.016891	1	0.69429	0.879987	0.981057
Cdipt	-0.151918	-0.184645	0.0553065	0.0225797	1	0.353737	0.854516	0.963208
Cdk1	0.136408	0.179683	-0.0300937	0.013182	1	0.60576	0.957817	0.985974
Cdk11b	0.10096	0.0098611	0.105072	0.0139735	1	0.981313	0.684867	0.976104
Cdk12	-0.322052	0.185196	-0.27378	0.233469	1	0.66009	0.441559	0.629786
Cdk13	-0.100434	-0.162074	-0.0456302	-0.10727	1	0.535289	0.903087	0.784149
Cdk16	-0.102277	0.155704	-0.214736	0.043245	1	0.246669	0.0951656	0.876167
Cdk17	0.0424754	0.110441	0.00355897	0.0715249	1	0.780252	0.99686	0.891713
Cdk19	-0.0678838	0.0822817	-0.100564	0.0496014	1	0.837925	0.775614	0.926906
Cdk2	0.156647	-0.107394	0.283185	0.0191432	1	0.76983	0.259907	0.974548
Cdk2ap1	0.378552	-0.151121	0.294886	-0.234787	1	0.812371	0.512563	0.716676
Cdk2ap2	-0.0385533	-0.0290754	-0.0623847	-0.0529068	1	0.960979	0.898378	0.934906
Cdk4	0.0558104	-0.238886	0.0916275	-0.203069	1	0.41303	0.824459	0.61473
Cdk5rap1	-0.164818	-0.0849175	0.11483	0.19473	1	0.892062	0.827068	0.734613
Cdk5rap2	-0.0946189	-0.0364241	-0.0626946	-0.00449986	1	0.95676	0.907876	0.997913
Cdk5rap3	-0.0338912	0.17066	-0.131607	0.0729449	1	0.462721	0.622627	0.853724
Cdk7	0.0453319	-0.0196145	0.0330191	-0.0319273	1	0.969121	0.946533	0.959845
Cdk8	0.00893951	0.254051	0.0316155	0.276727	1	0.217325	0.937663	0.275167
Cdk9	0.17327	0.017719	0.0952332	-0.0603176	1	0.968676	0.775532	0.897115
Cdkal1	-0.144973	-0.132291	-0.0302906	-0.0176086	1	0.81893	0.96616	0.985109
Cdkl1	-0.155817	0.155904	-0.372586	-0.0608654	1	0.768704	0.301188	0.939001
Cdkn1a	-0.0283467	-0.165562	0.530431	0.393216	1	0.778311	0.133993	0.446699
Cdkn1b	-0.170538	-0.0482697	0.157905	0.280173	1	0.941233	0.718289	0.53213
Cdkn2aip	0.140133	-0.0413193	0.124202	-0.0572502	1	0.922961	0.671801	0.897551
Cdkn2aipnl	0.0918101	-0.0932436	0.0529804	-0.132073	1	0.738296	0.864775	0.66291
Cdkn2c	0.113876	0.228719	-0.240916	-0.126073	1	0.520094	0.495711	0.819019
Cdkn2d	0.0538152	0.394	-0.266465	0.0737197	1	0.0669814	0.339502	0.890036
Cdkn3	-0.0207544	0.231858	-0.195375	0.0572382	1	0.259374	0.40541	0.892802
Cdpf1	0.174483	-0.13929	0.217637	-0.0961354	1	0.760837	0.56874	0.876477
Cdr2	-0.256812	0.358137	-0.399723	0.215226	1	0.257492	0.203142	0.674729
Cds2	-0.646389	-0.498826	-0.148328	-0.000765666	0.0589137	0.0382649	0.728242	0.999689
Cdt1	0.0921397	-0.164447	-0.0315408	-0.288127	1	0.383385	0.919545	0.119382
Cdv3	0.0995416	-0.101543	0.0818325	-0.119252	1	0.819182	0.849117	0.812583
Cdyl	0.108015	0.112804	-0.0431035	-0.0383146	1	0.699861	0.905939	0.935167
Cebpb	-0.0142264	-0.484506	0.483938	0.0136576	1	0.100582	0.0979989	0.98953
Cebpg	-0.0619291	-0.620223	0.559516	0.00122251	1	0.0078751	0.0416568	0.999689
Cebpz	0.0816446	-0.167316	-0.0710267	-0.319988	1	0.625532	0.8668	0.326167
Cecr2	-0.0953804	-0.0419828	-0.00790597	0.0454916	1	0.932201	0.988468	0.934906
Cecr5	0.220838	0.151613	0.226861	0.157636	1	0.645999	0.439435	0.701466
Celf1	-0.0421735	0.164698	-0.32446	-0.117589	1	0.423638	0.0490041	0.694179
Cenpa	-0.0249412	0.152427	-0.00672438	0.170644	1	0.595988	0.990111	0.626163
Cenpb	-0.00428452	0.067649	-0.372136	-0.300202	1	0.856701	0.0503934	0.219517
Cenpc1	0.0883168	0.00659483	0.012839	-0.068883	1	0.992513	0.980035	0.890368
Cenpe	-0.0672043	-0.0191539	-0.163716	-0.115666	1	0.969121	0.603152	0.796592
Cenpf	-0.144227	0.271361	-0.400602	0.0149862	1	0.271421	0.0760143	0.981057
Cenph	0.339833	-0.0487766	0.279177	-0.109433	1	0.934487	0.383689	0.842136
Cenpi	0.0587921	0.0120093	-0.0424157	-0.0891985	1	0.98099	0.914667	0.831051
Cenpj	0.170096	-0.0370314	0.279206	0.0720783	1	0.955631	0.43041	0.916185
Cenpk	0.179906	-0.122794	0.250063	-0.0526377	1	0.797864	0.483248	0.939377
Cenpl	0.0747288	0.0019344	0.0941969	0.0214025	1	0.996921	0.827755	0.97508
Cenpm	0.00331565	-0.305283	0.0622907	-0.246308	1	0.170477	0.87408	0.44858
Cenpn	0.0942829	-0.0589869	0.112256	-0.0410139	1	0.869197	0.691971	0.930647
Cenpo	-0.0485809	-0.235539	0.260032	0.0730738	1	0.402284	0.363115	0.890368
Cenpp	0.133274	-0.234511	0.109616	-0.258169	1	0.506136	0.807932	0.547449
Cenpq	0.058239	0.0172758	0.0372239	-0.00373924	1	0.977595	0.94492	0.997913
Cenpt	0.170064	0.114292	0.117625	0.061852	1	0.769503	0.751674	0.910464
Cenpu	-0.0852244	-0.0237888	-0.21897	-0.157534	1	0.959172	0.366127	0.645113
Cenpv	0.112628	-0.0722136	0.245615	0.060774	1	0.907256	0.528383	0.934179
Cenpw	-0.00295247	0.100943	-0.107087	-0.00319206	1	0.816206	0.787266	0.998189
Cep104	-0.0885118	0.184715	-0.359469	-0.0862423	1	0.564748	0.149373	0.868199
Cep120	-0.101133	0.125075	-0.196976	0.0292323	1	0.760837	0.567249	0.965977
Cep128	-0.303004	-0.284468	0.145723	0.16426	1	0.317967	0.70411	0.720028
Cep131	0.19695	-0.245004	0.418033	-0.0239208	1	0.539204	0.198945	0.97617
Cep135	0.103511	-0.0509454	-0.00729792	-0.161754	1	0.914507	0.989846	0.677976
Cep152	0.133012	-0.0634978	0.152624	-0.0438864	1	0.903742	0.682506	0.945283
Cep162	0.067237	-0.294037	0.218528	-0.142746	1	0.38923	0.58	0.807503
Cep164	-0.00183234	-0.210858	0.306611	0.0975851	1	0.538435	0.306413	0.860338
Cep170	0.0893633	-0.0676003	-0.047821	-0.204785	1	0.86263	0.901022	0.510653
Cep192	0.102503	0.0650005	-0.0609122	-0.0984147	1	0.86595	0.864102	0.807643
Cep250	0.0186921	-0.279328	0.201468	-0.096553	1	0.208309	0.457975	0.822941
Cep290	0.0970023	-0.0600914	-0.115512	-0.272606	1	0.905805	0.762339	0.438272
Cep350	-0.183551	0.0519468	-0.202763	0.0327347	1	0.913772	0.491048	0.956522
Cep44	0.0182525	0.0224034	0.230331	0.234482	1	0.970754	0.543981	0.615942
Cep57	0.195507	-0.0122914	0.18799	-0.0198083	1	0.97984	0.459596	0.970586
Cep57l1	0.0846672	-0.20787	0.169458	-0.123079	1	0.527664	0.642662	0.808712
Cep63	0.0661296	-0.100335	0.114472	-0.0519929	1	0.806312	0.757922	0.92954
Cep68	-0.140413	-0.50095	0.146504	-0.214033	1	0.0222652	0.709214	0.629377
Cep70	0.0744806	-0.0350498	0.0762723	-0.033258	1	0.937873	0.822919	0.947303
Cep72	0.163798	-0.191445	0.392346	0.0371017	1	0.62376	0.184333	0.961269
Cep76	-0.0739393	0.17665	-0.26561	-0.0150203	1	0.421515	0.16987	0.975306
Cep78	0.034988	-0.243592	0.0896072	-0.188973	1	0.432107	0.840037	0.671324
Cep83	-0.0597717	-0.166005	-0.135153	-0.241387	1	0.507677	0.627104	0.374942
Cep85	0.237085	0.114559	0.143435	0.0209094	1	0.667613	0.56824	0.965977
Cep89	-0.128599	0.444984	-0.298998	0.274585	1	0.00486731	0.152498	0.286888
Cep95	-0.0229702	0.0321816	0.106983	0.162135	1	0.955631	0.791845	0.719316
Cep97	0.0553459	-0.108899	0.36098	0.196736	1	0.822543	0.233811	0.679017
Cept1	0.0736816	-0.129004	0.248528	0.0458415	1	0.769705	0.462538	0.946434
Cercam	0.0118627	-0.227228	0.232171	-0.00691963	1	0.259374	0.278365	0.991931
Cers2	0.007475	-0.352198	0.242787	-0.116885	1	0.0237949	0.23974	0.728111
Ces2g	0.130304	0.0312944	0.280583	0.181573	1	0.966487	0.509507	0.778333
Cetn2	-0.00105268	0.341637	-0.388348	-0.0456579	1	0.241342	0.181242	0.947303
Cetn3	0.0239098	-0.0948887	0.0128878	-0.105911	1	0.860987	0.983389	0.859855
Cfdp1	0.0503251	-0.102515	-0.0104202	-0.16326	1	0.752972	0.981993	0.629787
Cfl1	0.105019	0.0770486	-0.0932408	-0.121211	1	0.883183	0.840297	0.822576
Cfl2	0.209993	-0.180819	0.498264	0.107452	1	0.671644	0.0840657	0.86281
Cflar	-0.0191535	-0.0945693	0.12697	0.0515546	1	0.87441	0.801388	0.948221
Cggbp1	0.0389483	-0.0369943	0.0378577	-0.0380849	1	0.942325	0.932168	0.946542
Cgrrf1	0.276507	0.22516	0.00281523	-0.0485316	1	0.34051	0.997632	0.924045
Chac1	-0.377414	-1.35491	0.880871	-0.0966267	1	8.09e-12	0.00012007	0.890036
Chac2	-0.191692	0.0979558	-0.158042	0.131605	1	0.826132	0.659272	0.786962
Chaf1a	0.121504	-0.0135203	-0.0136373	-0.148661	1	0.968628	0.971021	0.545084
Chaf1b	0.109304	-0.159657	-0.0976795	-0.36664	1	0.465079	0.720236	0.0410701
Champ1	-0.101503	-0.0775777	-0.078039	-0.0541133	1	0.841081	0.827549	0.913141
Chchd1	0.0187073	-0.192598	-0.0101464	-0.221451	1	0.581134	0.986698	0.592775
Chchd10	-0.259752	0.342523	-0.615851	-0.0135768	1	0.062777	0.000161557	0.980745
Chchd2	0.239673	0.221894	0.109118	0.0913385	1	0.65279	0.850379	0.906834
Chchd3	-0.0513295	-0.00742128	-0.0686096	-0.0247014	1	0.989964	0.843496	0.965307
Chchd4	-0.0562737	-0.044651	-0.0694796	-0.0578568	1	0.950965	0.901046	0.939001
Chchd5	-0.0341358	-0.049632	0.211256	0.19576	1	0.940871	0.607547	0.714492
Chchd6	0.0922256	0.0300456	-0.250477	-0.312658	1	0.967453	0.571523	0.545084
Chchd7	-0.122241	-0.291419	0.496661	0.327483	1	0.161823	0.00879314	0.208522
Chd1	-0.0308587	-0.00738118	-0.0220165	0.00146101	1	0.990761	0.962207	0.999689
Chd1l	0.186306	-0.0947479	0.101967	-0.179087	1	0.72065	0.694946	0.477719
Chd2	-0.298595	-0.046678	0.0751958	0.327113	1	0.951486	0.898378	0.498394
Chd3	0.0933205	-0.23742	0.181803	-0.148937	1	0.547198	0.676019	0.803518
Chd4	-0.0719578	0.0773686	-0.22054	-0.0712139	1	0.828897	0.349539	0.869063
Chd6	-0.0325413	-0.125133	0.297333	0.204741	1	0.771798	0.333371	0.645205
Chd7	-0.0955843	0.0393038	-0.27325	-0.138361	1	0.934487	0.257933	0.720028
Chd8	-0.0349938	0.036979	-0.102409	-0.030436	1	0.91868	0.687775	0.943597
Chd9	0.0715228	-0.143251	0.360075	0.145302	1	0.791269	0.33028	0.822092
Chek1	0.134727	-0.267575	0.229425	-0.172877	1	0.222851	0.363115	0.62108
Chek2	0.0624402	0.041846	0.0827636	0.0621694	1	0.907637	0.762339	0.868199
Cherp	0.0484637	-0.0485671	-0.0198672	-0.116898	1	0.912455	0.966449	0.772725
Chfr	-0.0513511	-0.0537903	0.188137	0.185697	1	0.875668	0.386362	0.485371
Chic2	-0.0524354	-0.0106361	0.0256687	0.0674681	1	0.986654	0.959447	0.897376
Chid1	-0.0602173	-0.07957	-0.141106	-0.160459	1	0.830514	0.632027	0.645693
Chka	-0.0542773	-0.127297	-0.0585505	-0.131571	1	0.79997	0.916122	0.822941
Chm	-0.0700632	-0.0864572	-0.122219	-0.138613	1	0.882487	0.798281	0.816738
Chml	0.0350189	-0.278837	0.177428	-0.136428	1	0.39607	0.659069	0.807643
Chmp1a	0.127877	0.132185	-0.0870108	-0.082703	1	0.538171	0.735636	0.79841
Chmp1b	-0.0101573	0.174526	0.0301051	0.214788	1	0.538005	0.947772	0.511966
Chmp2a	-0.126257	-0.0127552	-0.11645	-0.00294837	1	0.972289	0.619355	0.997491
Chmp2b	-0.055474	0.271729	-0.148512	0.178692	1	0.502324	0.762417	0.770717
Chmp3	-0.00107713	0.12825	-0.0314498	0.0978775	1	0.630131	0.934427	0.794331
Chmp4b	-0.059572	0.186316	-0.212767	0.0331208	1	0.378739	0.308013	0.940566
Chmp5	0.00942873	0.168369	-0.0443642	0.114576	1	0.38911	0.883739	0.694281
Chmp6	0.075124	-0.0967014	-0.0208194	-0.192645	1	0.800977	0.967567	0.592607
Chmp7	0.0201805	0.196638	-0.247246	-0.070789	1	0.455408	0.323963	0.879922
Chordc1	0.130329	0.748688	-0.139538	0.478821	1	0.000902123	0.762679	0.188183
Chp1	-0.0599115	0.175034	-0.184646	0.0502992	1	0.585887	0.564126	0.930647
Chpf2	0.0992892	0.193457	-0.0192674	0.0749008	1	0.598876	0.975934	0.901122
Chrac1	-0.0589741	-0.201776	0.0314282	-0.111373	1	0.486549	0.949858	0.810128
Chst11	-0.0345354	-0.0383939	-0.0148885	-0.018747	1	0.928898	0.975018	0.971974
Chsy1	0.0312033	-0.303303	0.26216	-0.0723464	1	0.112469	0.240316	0.868199
Chtf18	0.0886147	0.0272246	-0.0830271	-0.144417	1	0.944626	0.762679	0.615942
Chtf8	-0.0549329	-0.122663	-0.142812	-0.210543	1	0.677939	0.610814	0.476659
Chtop	0.0830053	-0.0997249	0.154386	-0.0283439	1	0.728495	0.530813	0.952625
Chuk	0.112214	-0.0722237	0.137569	-0.0468689	1	0.861791	0.665407	0.930647
Churc1	0.182383	0.106591	0.0767529	0.000960736	1	0.809595	0.860771	0.999689
Ciao1	-0.10545	0.112954	-0.157076	0.0613278	1	0.643206	0.478279	0.869565
Ciapin1	0.0832718	-0.115393	0.0304094	-0.168255	1	0.722678	0.945054	0.629806
Cib1	-0.120545	0.208193	-0.341236	-0.0124979	1	0.317816	0.0600511	0.980658
Cic	-0.100846	-0.0117157	-0.0845664	0.00456402	1	0.985011	0.838793	0.997491
Cinp	0.0249578	-0.227511	-0.0821541	-0.334623	1	0.471544	0.850379	0.323208
Cipc	0.0274285	-0.153639	0.0871069	-0.0939607	1	0.544413	0.781224	0.807643
Cir1	0.375296	-0.0685703	0.352604	-0.0912617	1	0.923924	0.364184	0.902171
Cirbp	0.164186	0.0430235	0.282799	0.161637	1	0.955558	0.498912	0.807351
Cirh1a	-0.0728053	-0.216057	-0.0206042	-0.163856	1	0.574504	0.975934	0.761917
Cisd1	0.0860431	-0.128907	-0.141091	-0.356041	1	0.768642	0.729255	0.309376
Cisd2	0.109931	-0.0874046	0.107405	-0.0899303	1	0.813411	0.743459	0.832136
Cish	-0.625617	-0.345875	0.0549945	0.334736	0.0141895	0.139604	0.9017	0.282264
Cit	-0.223096	0.093782	-0.388093	-0.0712146	1	0.859725	0.188313	0.913303
Cited2	-0.235342	-0.190745	0.217441	0.262038	1	0.680564	0.614741	0.614071
Cited4	-0.352941	-0.585265	0.138162	-0.0941612	1	0.00283558	0.718663	0.859538
Ciz1	0.163829	-0.0633629	0.227384	0.0001921	1	0.90451	0.48794	0.999689
Ckap2	0.0383484	0.278657	-0.120723	0.119586	1	0.098062	0.642783	0.710733
Ckap2l	0.0339302	0.0315525	-0.016639	-0.0190167	1	0.947366	0.973052	0.973158
Ckap5	-0.0728152	0.0614732	-0.218144	-0.0838558	1	0.87909	0.386952	0.847535
Cks1b	0.0555356	0.251752	-0.0416071	0.154609	1	0.356381	0.928956	0.716676
Cks2	0.335021	-0.003	0.331389	-0.0066327	1	0.996908	0.411614	0.997491
Clasp1	-0.124022	0.101276	-0.285064	-0.0597664	1	0.768829	0.20783	0.898819
Clasp2	0.0144032	-0.135036	0.0693496	-0.08009	1	0.72877	0.87408	0.885957
Clasrp	0.20957	-0.0844463	0.329708	0.0356915	1	0.86439	0.260277	0.960077
Clcc1	0.0965165	-0.14308	0.245961	0.00636456	1	0.67157	0.37621	0.994801
Clcn2	0.0626309	-0.524451	0.963046	0.375964	1	0.0135895	3.14e-07	0.254456
Clcn3	-0.14641	0.0180115	-0.0347544	0.129668	1	0.974191	0.946533	0.787918
Clcn4-2	0.0727107	-0.102349	0.0810618	-0.0939982	1	0.710117	0.781276	0.790779
Clcn7	0.067664	0.0791874	0.189504	0.201027	1	0.87059	0.591622	0.645113
Cldn13	-0.0686179	0.211684	-0.228984	0.0513181	1	0.394614	0.363115	0.918359
Cldn25	0.00829488	-0.00473783	-0.0145759	-0.0276086	1	0.992935	0.975934	0.961045
Clec16a	-0.168415	-0.0491601	-0.338655	-0.2194	1	0.930375	0.230501	0.600873
Clhc1	0.414113	0.247547	-0.0274888	-0.194055	1	0.401187	0.959721	0.645113
Clic1	0.0148257	-0.128627	0.0801355	-0.0633173	1	0.678989	0.822453	0.891713
Clic4	-0.367277	-0.500872	-0.0567452	-0.19034	1	0.00992978	0.898378	0.636745
Clint1	-0.134269	-0.0342391	-0.135276	-0.0352461	1	0.952444	0.710851	0.955327
Clip1	0.0931631	-0.517575	0.00116402	-0.609574	1	0.0193786	0.998982	0.016345
Clk1	-0.00809922	0.141128	0.379843	0.52907	1	0.804943	0.301188	0.184597
Clk2	0.213525	-0.107422	0.481553	0.160606	1	0.789775	0.0337514	0.707727
Clk3	-0.0603167	0.348854	-0.148555	0.260616	1	0.0783718	0.626818	0.387498
Clk4	0.0471521	0.0190053	0.386472	0.358325	1	0.979139	0.239508	0.392627
Cln5	-0.104681	0.399582	-0.426178	0.0780856	1	0.177	0.163012	0.907821
Cln6	-0.133255	-0.24494	0.0179577	-0.0937277	1	0.366116	0.974637	0.849
Cln8	-0.280887	0.313749	-0.492377	0.102258	1	0.232712	0.0372741	0.841684
Clns1a	0.00633937	-0.192477	0.00442468	-0.194392	1	0.436874	0.993521	0.537702
Clp1	-0.110097	0.289142	-0.408147	-0.00890681	1	0.351412	0.141947	0.993091
Clpb	-0.113117	-0.144512	-0.135815	-0.16721	1	0.723211	0.738167	0.725136
Clpp	-0.104525	-0.0582334	-0.288723	-0.242431	1	0.912028	0.314308	0.53213
Clptm1	-0.0307539	-0.0878661	-0.0535372	-0.110649	1	0.720787	0.84572	0.688225
Clptm1l	-0.00736393	-0.223972	0.05866	-0.157948	1	0.284941	0.86019	0.62044
Clpx	0.034859	0.0357892	0.0187489	0.019679	1	0.923667	0.96051	0.965977
Clspn	0.111103	-0.0490555	0.064559	-0.0955999	1	0.914507	0.864775	0.825236
Clta	0.0460161	0.188381	-0.233227	-0.0908623	1	0.432301	0.305739	0.818899
Cltb	-0.0317975	0.201968	-0.296095	-0.0623291	1	0.339094	0.121755	0.878024
Cltc	-0.229774	0.267493	-0.533385	-0.0361171	1	0.372077	0.0263229	0.958341
Cluap1	-0.0591304	-0.212667	0.0960473	-0.0574898	1	0.590532	0.846918	0.93686
Cluh	0.00517376	-0.0727938	-0.151342	-0.22931	1	0.871668	0.659272	0.532784
Clybl	-0.134734	-0.012295	-0.0594706	0.0629685	1	0.981339	0.877836	0.897376
Cmas	-0.240846	0.439508	-0.34157	0.338783	1	0.0880236	0.271062	0.378271
Cmc2	0.0137782	0.0392167	-0.00834913	0.0170895	1	0.934487	0.986835	0.976104
Cmip	0.0167357	0.1605	-0.00275318	0.141011	1	0.609575	0.997992	0.736322
Cmpk1	0.083794	0.0126639	-0.0716466	-0.142777	1	0.985497	0.879543	0.782614
Cmpk2	0.185246	0.557919	-0.253677	0.118995	1	0.00714975	0.426807	0.817546
Cmss1	-0.079894	-0.118535	-0.0595528	-0.098194	1	0.827964	0.917381	0.884811
Cmtm6	0.000484565	-0.250358	0.312716	0.0618735	1	0.408191	0.279972	0.920948
Cmtr1	-0.0282681	0.155083	-0.0520414	0.131309	1	0.621461	0.901046	0.758607
Cnbp	-0.0371762	-0.0211395	0.0580048	0.0740414	1	0.95406	0.827549	0.812681
Cndp2	-0.0830553	-0.0917598	-0.00365421	-0.0123587	1	0.853718	0.997627	0.987913
Cnep1r1	-0.0104176	0.0589182	0.124698	0.194033	1	0.896959	0.717302	0.592949
Cnih1	0.227145	0.0937304	0.107433	-0.0259815	1	0.798135	0.749683	0.965307
Cnih4	0.020721	-0.253097	0.273127	-0.000690551	1	0.277917	0.260277	0.999689
Cnn3	0.215888	0.0429352	0.353296	0.180343	1	0.957172	0.388159	0.794508
Cnnm2	-0.02297	-0.0350023	-0.228426	-0.240458	1	0.9634	0.629528	0.686474
Cnnm3	-0.169633	-0.108744	0.103975	0.164864	1	0.834242	0.8302	0.762834
Cnnm4	-0.0878942	-0.146998	0.0376524	-0.0214519	1	0.769489	0.954628	0.980011
Cnot1	0.0137474	-0.064533	-0.108933	-0.187213	1	0.882531	0.757922	0.614071
Cnot10	0.0768327	-0.00205884	-0.0775599	-0.156452	1	0.996452	0.773384	0.547249
Cnot11	0.163367	-0.139457	-0.0421045	-0.344928	1	0.659972	0.920811	0.197189
Cnot2	0.0063842	-0.0532107	0.0355049	-0.02409	1	0.833675	0.891161	0.945838
Cnot3	0.0441894	-0.137422	0.14947	-0.0321412	1	0.616044	0.583859	0.949369
Cnot4	-0.20686	0.077431	-0.226917	0.057374	1	0.784312	0.226615	0.877942
Cnot6	-0.0126618	-0.126108	0.0180256	-0.095421	1	0.58655	0.961797	0.770717
Cnot6l	0.00856776	-0.0935189	0.315697	0.21361	1	0.86966	0.37729	0.683989
Cnot7	0.0201464	0.0860504	-0.0285476	0.0373564	1	0.828897	0.953462	0.946625
Cnot8	0.0182638	0.135985	0.113302	0.231023	1	0.618696	0.705032	0.403434
Cnppd1	-0.115101	-0.00202209	0.165462	0.278541	1	0.996908	0.657893	0.462599
Cnpy2	0.0113364	-0.160686	0.370961	0.198939	1	0.727637	0.258696	0.706829
Cnpy3	0.13782	0.138313	0.262885	0.263378	1	0.786697	0.506008	0.593419
Cnpy4	0.319487	0.0540589	0.43291	0.167482	1	0.932201	0.150383	0.76189
Cnst	-0.188035	0.13373	-0.265595	0.05617	1	0.6531	0.25039	0.902877
Cntn3	0.0199804	-0.0154103	0.071989	0.0365983	1	0.9834	0.895825	0.965307
Cntrl	-0.0981025	0.0496907	0.0659334	0.213727	1	0.931836	0.891161	0.629428
Cntrob	0.0664267	-0.00148238	0.203114	0.135205	1	0.997511	0.591939	0.807643
Coa3	0.0131856	0.287953	-0.262847	0.01192	1	0.16746	0.267125	0.98416
Coa5	-0.190427	-0.14303	-0.204262	-0.156865	1	0.774301	0.630245	0.792521
Coa6	0.00625931	0.0460792	-0.0996808	-0.0598609	1	0.943478	0.840851	0.933812
Coasy	0.0710699	0.12809	0.0789912	0.136011	1	0.733918	0.850379	0.770717
Cog1	-0.0373567	0.0603205	-0.136733	-0.0390559	1	0.869871	0.619355	0.934906
Cog2	-0.0297179	-0.0419981	-0.0969555	-0.109236	1	0.929793	0.785919	0.803518
Cog3	0.0199854	0.050797	0.124358	0.15517	1	0.917899	0.728998	0.708023
Cog4	0.0709619	0.0220015	-0.0314075	-0.0803679	1	0.954046	0.921563	0.80432
Cog5	0.112521	-0.384477	0.243593	-0.253405	1	0.273553	0.57473	0.645113
Cog6	0.0404713	0.10543	0.119326	0.184285	1	0.809972	0.76246	0.671233
Cog7	0.086521	-0.142576	0.110888	-0.118209	1	0.729406	0.793552	0.82323
Cog8	0.0575633	0.0420035	-0.0311426	-0.0467024	1	0.928898	0.94509	0.930647
Coil	0.105918	-0.187937	-0.0538156	-0.347671	1	0.653785	0.923115	0.391511
Col4a2	0.00264469	-0.271156	0.644765	0.370964	1	0.568444	0.0490226	0.476943
Col4a3bp	-0.118021	0.0820471	-0.117595	0.0824734	1	0.769705	0.628971	0.808257
Col5a1	0.0283335	-0.0315023	-0.122235	-0.182071	1	0.955654	0.751674	0.665642
Commd1	-0.0530864	0.160307	-0.283646	-0.0702529	1	0.528567	0.172821	0.869063
Commd10	0.0803996	-0.235638	0.177684	-0.138353	1	0.476081	0.638437	0.79242
Commd2	-0.000708703	-0.0235583	0.0204025	-0.00244714	1	0.968623	0.975398	0.999248
Commd3	0.0146172	-0.157206	0.0732483	-0.0985745	1	0.733918	0.891161	0.879596
Commd4	0.167332	0.00501244	0.222669	0.0603486	1	0.993373	0.506008	0.924045
Commd5	-0.000722479	-0.0342845	-0.163416	-0.196978	1	0.956785	0.690365	0.681458
Commd6	-0.0496779	0.018803	-0.0909913	-0.0225103	1	0.972726	0.828281	0.973164
Commd7	-0.155017	-0.0749642	-0.061226	0.018827	1	0.899856	0.911596	0.98149
Commd8	0.00622369	0.0719122	-0.0775273	-0.0118388	1	0.878196	0.852732	0.987237
Commd9	0.170793	0.127954	0.0110855	-0.0317532	1	0.790212	0.986835	0.966291
Comt	-0.00359146	-0.0338546	0.0742742	0.0440111	1	0.923364	0.779563	0.904966
Copa	-0.0399204	0.0755699	-0.142614	-0.0271239	1	0.774991	0.496358	0.946625
Copb1	-0.0522221	-0.126874	0.0378486	-0.0368036	1	0.767641	0.944643	0.957662
Copb2	-0.0277011	0.180101	-0.349294	-0.141492	1	0.438326	0.0600511	0.663936
Cope	-0.10329	0.141187	-0.203708	0.0407689	1	0.596821	0.390183	0.933134
Copg1	-0.000167387	-0.0390345	-0.0706227	-0.10949	1	0.919237	0.818994	0.747194
Copg2	0.0593701	-0.0357756	-0.0203558	-0.115502	1	0.954618	0.974637	0.830483
Cops2	-0.0548657	0.132054	-0.154207	0.0327131	1	0.677939	0.608004	0.953648
Cops3	0.111094	-0.169096	0.0739232	-0.206267	1	0.587434	0.850622	0.566054
Cops4	-0.0349182	-0.108184	-0.146758	-0.220024	1	0.752025	0.627439	0.485946
Cops5	0.0135761	0.0255927	-0.157109	-0.145092	1	0.955654	0.567249	0.674877
Cops6	-0.0147351	-0.00900121	-0.234472	-0.228738	1	0.987754	0.334369	0.446386
Cops7a	-0.116775	-0.0624256	-0.136254	-0.0819055	1	0.912028	0.741647	0.890036
Cops7b	0.078149	-0.0595477	0.212334	0.0746377	1	0.892297	0.440927	0.877942
Cops8	-0.0246072	0.015186	-0.0371268	0.0026664	1	0.967772	0.910623	0.997913
Copz1	-0.164907	0.240007	-0.173312	0.231602	1	0.156007	0.411041	0.301803
Coq10a	0.0438498	0.0306784	0.217419	0.204247	1	0.96341	0.607504	0.710733
Coq10b	0.0171415	0.202729	-0.270763	-0.0851753	1	0.457181	0.284218	0.854842
Coq2	0.0671995	-0.283446	0.212978	-0.137668	1	0.32242	0.531009	0.784065
Coq3	-0.0962193	-0.0718068	0.0452089	0.0696214	1	0.918819	0.94775	0.933134
Coq4	-0.0832461	-0.0655905	-0.236469	-0.218813	1	0.91868	0.560198	0.674877
Coq5	-0.0458497	-0.239126	0.0306348	-0.162641	1	0.29472	0.944459	0.645113
Coq6	-0.0605091	-0.115592	-0.120026	-0.175109	1	0.790834	0.76781	0.701566
Coq7	0.124497	-0.0319587	0.0479826	-0.108474	1	0.958515	0.927258	0.844711
Coq9	-0.081619	-0.155326	0.108061	0.0343541	1	0.482458	0.681563	0.937444
Coro1a	0.0450921	0.674156	-0.264231	0.364833	1	0.00809995	0.479534	0.413876
Coro1b	0.0108357	0.143974	-0.0226189	0.110519	1	0.585887	0.958651	0.764148
Coro1c	-0.0721809	0.0983903	-0.375907	-0.205336	1	0.698812	0.0150758	0.377518
Coro7	0.0917433	0.22616	-0.0314748	0.102942	1	0.559645	0.960157	0.870911
Cotl1	0.0399694	0.855897	-0.228551	0.587377	1	0.00180201	0.632385	0.172003
Cox10	-0.027861	0.0882187	-0.29561	-0.17953	1	0.867291	0.369743	0.717639
Cox11	0.0655446	-0.0338358	0.0258691	-0.0735112	1	0.936989	0.950486	0.855069
Cox14	0.0282685	0.167716	0.0974429	0.23689	1	0.590406	0.794733	0.486873
Cox15	0.0993795	0.0248382	-0.0468202	-0.121361	1	0.955558	0.895964	0.725987
Cox16	-0.0187124	-0.0987656	-0.161685	-0.241738	1	0.866667	0.731827	0.645113
Cox17	-0.0112527	0.279664	-0.113085	0.177831	1	0.0535811	0.628453	0.457581
Cox18	-0.0125281	-0.185667	0.0436569	-0.129482	1	0.665013	0.942628	0.82756
Cox19	0.00580986	0.0845492	-0.231594	-0.152854	1	0.813695	0.332904	0.654792
Cox20	-0.100674	-0.00407683	-0.149222	-0.0526243	1	0.994069	0.681928	0.931065
Cox4i1	-0.0370723	0.197499	-0.252401	-0.01783	1	0.259682	0.137955	0.967177
Cox5a	0.00897581	0.16303	-0.229472	-0.0754172	1	0.727637	0.568047	0.915155
Cox5b	0.0252149	-0.00631817	-0.15537	-0.186903	1	0.992935	0.68012	0.674111
Cox6a1	-0.0800439	0.154132	-0.282698	-0.048522	1	0.443036	0.0872856	0.894223
Cox6b1	-0.0827177	0.24962	-0.343344	-0.0110064	1	0.162707	0.0477776	0.982709
Cox6b2	-0.123158	0.351683	0.110647	0.585488	1	0.185047	0.79271	0.0212595
Cox6c	0.0780985	0.343768	-0.164657	0.101013	1	0.210726	0.668965	0.855212
Cox7a2	-0.0463985	0.251816	-0.333203	-0.0349886	1	0.197298	0.0794531	0.940566
Cox7a2l	0.0792712	-0.280471	0.558992	0.19925	1	0.451376	0.0520689	0.714492
Cox7b	-0.0608621	0.123556	-0.229723	-0.0453049	1	0.735427	0.425557	0.936941
Cox7c	0.228445	0.150714	0.0706185	-0.00711272	1	0.790599	0.909132	0.997281
Cox8a	-0.107554	0.196165	-0.257076	0.0466427	1	0.42997	0.267585	0.926429
Cpd	0.091412	-0.176191	0.124706	-0.142897	1	0.623619	0.757258	0.77248
Cpeb3	-0.254562	0.417754	-0.414663	0.257652	1	0.113974	0.145394	0.548231
Cpeb4	-0.21306	0.229352	-0.271601	0.170811	1	0.505384	0.40541	0.725987
Cpne1	-0.0410859	-0.00307477	0.0972286	0.13524	1	0.993813	0.715151	0.645205
Cpox	-0.0272449	-0.00201587	-0.0467483	-0.0215192	1	0.99682	0.892406	0.965977
Cpped1	0.0728901	0.0387094	0.124994	0.0908132	1	0.94822	0.758373	0.872199
Cpsf1	0.0259408	-0.109915	0.0482301	-0.0876261	1	0.681083	0.882398	0.808257
Cpsf2	0.0490138	-0.0731057	-0.0482726	-0.170392	1	0.802158	0.871914	0.499867
Cpsf3	-0.039515	0.0769408	-0.211574	-0.0951182	1	0.857184	0.456971	0.83507
Cpsf3l	-0.29193	-0.264531	-0.0803695	-0.0529711	1	0.231815	0.821049	0.915792
Cpsf4	0.304683	-0.00788901	0.314115	0.00154338	1	0.990868	0.203627	0.999689
Cpsf6	-0.0288149	-0.0950803	0.000927724	-0.0653377	1	0.70808	0.998969	0.850253
Cpsf7	0.253274	-0.124907	0.517826	0.139645	1	0.769705	0.0337514	0.780863
Cpt1a	0.00570167	0.511278	-0.170342	0.335234	1	0.101812	0.735755	0.498394
Cpt2	-0.0990553	0.257301	-0.265787	0.09057	1	0.430689	0.422781	0.878109
Cr1l	0.002725	-0.124748	0.098535	-0.0289375	1	0.7019	0.773841	0.960683
Cramp1l	-0.0484907	0.0339941	0.0854786	0.167963	1	0.953116	0.840037	0.694454
Crat	-0.180626	0.256081	-0.374598	0.0621081	1	0.37124	0.141002	0.915155
Crbn	0.0514281	-0.022035	0.097816	0.0243528	1	0.959512	0.748813	0.964681
Crcp	0.0712354	-0.0823189	0.131166	-0.022388	1	0.844644	0.701633	0.970586
Creb1	-0.134496	-0.22258	0.22564	0.137557	1	0.528567	0.531009	0.797914
Creb3	-0.213847	0.005727	-0.23266	-0.0130856	1	0.992935	0.451073	0.985949
Crebbp	-0.362553	-0.024727	-0.244121	0.0937052	1	0.972102	0.567721	0.895799
Crebl2	-0.223702	0.17028	0.159481	0.553464	1	0.769503	0.767228	0.202332
Crebrf	-0.262525	-0.0261712	0.164646	0.401	1	0.967989	0.7137	0.311787
Crebzf	0.181528	-0.182819	0.569324	0.204977	1	0.590532	0.0117309	0.621777
Creg1	-0.246936	0.223736	-0.268344	0.202329	1	0.516735	0.40858	0.653036
Creld2	0.0657373	0.257917	-0.129005	0.0631753	1	0.425003	0.759493	0.923982
Crip2	0.124201	-0.0123412	-0.238715	-0.375257	1	0.987928	0.539886	0.340572
Cript	-0.051388	0.0823269	-0.121881	0.011834	1	0.832937	0.710317	0.985109
Crk	0.0441686	0.12516	0.0674268	0.148418	1	0.669727	0.846126	0.664708
Crkl	-0.195602	-0.0648491	-0.209827	-0.0790748	1	0.832563	0.278365	0.816738
Crlf1	-0.0339254	-0.0595738	-0.162102	-0.187751	1	0.939239	0.761614	0.784065
Crlf3	-0.0780388	-0.0601322	0.0121082	0.0300148	1	0.844644	0.975934	0.940858
Crls1	-0.0371464	-0.396292	0.206103	-0.153043	1	0.22242	0.636517	0.807351
Crnkl1	0.00734729	0.126325	-0.231139	-0.112161	1	0.732824	0.430066	0.813624
Crot	-0.0100418	0.275016	0.0168089	0.301867	1	0.436874	0.979964	0.485477
Crtc1	-0.259541	0.0999248	-0.400307	-0.0408407	1	0.869542	0.257658	0.963865
Crtc2	0.0607305	0.0515891	0.116374	0.107233	1	0.927935	0.782513	0.841435
Crtc3	0.0643696	0.141372	-0.311006	-0.234004	1	0.806997	0.440305	0.683989
Cry2	0.0447876	-0.254288	0.183364	-0.115711	1	0.587434	0.720745	0.878024
Cryzl1	0.145401	-0.00599794	0.118214	-0.0331849	1	0.992722	0.731827	0.954584
Cs	-0.0441479	-0.0511671	-0.125297	-0.132316	1	0.87909	0.607504	0.649751
Csde1	-0.19178	0.0143773	-0.231493	-0.0253364	1	0.969508	0.239417	0.95665
Cse1l	0.00469514	-0.148	-0.0140305	-0.166725	1	0.720788	0.981534	0.73107
Csf2rb	-0.047056	-0.0275554	0.385496	0.404997	1	0.967656	0.20964	0.322708
Csgalnact2	0.0591871	0.00864009	0.0703519	0.0198048	1	0.992419	0.892406	0.980312
Csk	0.0879936	0.258153	-0.0934076	0.0767517	1	0.244715	0.783695	0.86281
Csnk1a1	-0.124614	-0.0930079	0.0620762	0.0936825	1	0.732824	0.838152	0.783717
Csnk1d	-0.0978624	0.267242	-0.0486265	0.316478	1	0.326212	0.916895	0.326167
Csnk1g1	-0.185973	0.0787208	-0.268572	-0.00387855	1	0.869871	0.376248	0.997913
Csnk1g2	0.00235065	0.0720081	-0.0179263	0.0517311	1	0.783182	0.959136	0.880884
Csnk1g3	0.0931795	-0.100975	-0.0100033	-0.204158	1	0.76102	0.982218	0.510653
Csnk2a1	0.0956534	-0.0768522	0.165396	-0.00710944	1	0.857184	0.594007	0.993367
Csnk2a2	-0.0138165	-0.176392	0.151248	-0.011328	1	0.44907	0.56335	0.983387
Csnk2b	-0.0594393	-0.00581991	-0.0972703	-0.043651	1	0.989341	0.656275	0.896505
Cspp1	0.0801807	-0.146707	0.234608	0.00772031	1	0.7182	0.487452	0.994544
Csrp1	-0.0258811	-0.193968	0.309	0.140913	1	0.580239	0.290022	0.777825
Csrp2bp	0.0619989	-0.128131	-0.0819739	-0.272104	1	0.658632	0.802934	0.296298
Cst3	0.0974176	0.235945	0.0529206	0.191447	1	0.401027	0.905941	0.629806
Cstb	0.0209953	0.305199	-0.0112898	0.272914	1	0.456516	0.988669	0.622418
Cstf1	-0.0451274	-0.121915	-0.126123	-0.202911	1	0.665136	0.655098	0.477409
Cstf2	-0.0340033	-0.185537	-0.0779871	-0.22952	1	0.289073	0.757922	0.261632
Cstf2t	0.0459752	0.0448522	-0.0606487	-0.0617717	1	0.937873	0.898378	0.920939
Cstf3	0.0894982	0.199307	-0.0503575	0.0594512	1	0.456577	0.901562	0.902877
Ctage5	0.0255444	-0.329757	-0.0386021	-0.393904	1	0.193655	0.938859	0.197189
Ctbp1	-0.0204248	0.0825187	-0.103408	-0.000464107	1	0.750288	0.66294	0.999689
Ctc1	-0.0144315	-0.0648337	-0.00809753	-0.0584997	1	0.869465	0.986835	0.901122
Ctcf	0.077107	0.000417737	0.0365508	-0.0401385	1	0.998748	0.925813	0.934906
Ctdnep1	-0.101747	0.025327	-0.161672	-0.0345975	1	0.959198	0.584881	0.949562
Ctdp1	0.0558378	0.0370881	-0.161365	-0.180114	1	0.912028	0.415268	0.431936
Ctdsp1	0.0138053	-0.171276	0.16271	-0.022371	1	0.553356	0.588759	0.97025
Ctdsp2	-0.164711	-0.262481	0.235223	0.137453	1	0.315674	0.411518	0.756423
Ctdspl	-0.0239556	-0.0397032	-0.0406056	-0.0563532	1	0.958515	0.954628	0.946542
Ctdspl2	-0.108564	-0.177878	0.0256516	-0.0436624	1	0.659781	0.967537	0.951243
Ctnna1	-0.174151	0.0448026	-0.149479	0.0694738	1	0.893327	0.491842	0.838789
Ctnnal1	0.0252963	-0.225398	0.170324	-0.0803699	1	0.39607	0.583859	0.869948
Ctnnb1	-0.086448	0.0663452	-0.0169416	0.135852	1	0.827595	0.964476	0.629806
Ctnnbl1	0.0246349	-0.0220427	-0.11194	-0.158618	1	0.960979	0.718663	0.645113
Ctnnd1	-0.239063	-0.0419313	-0.253896	-0.0567641	1	0.953708	0.519295	0.939776
Ctns	0.112402	-0.0428369	0.0947931	-0.0604463	1	0.951486	0.850622	0.934492
Ctps	0.0962749	-0.331373	0.123998	-0.303649	1	0.0428581	0.650037	0.185002
Ctr9	-0.131968	-0.0441307	-0.135386	-0.047549	1	0.930198	0.695994	0.934103
Ctsa	0.0826865	-0.135743	0.540987	0.322558	1	0.67779	0.00611933	0.256153
Ctsb	-0.205779	0.507737	-0.538951	0.174564	1	0.0350001	0.042984	0.733509
Ctsc	-0.101948	0.603443	-0.202092	0.503299	1	0.0562841	0.694044	0.268752
Ctsd	-0.0745408	-0.231594	0.239058	0.0820055	1	0.398184	0.394265	0.870911
Ctse	-0.0317819	-0.0784544	0.242716	0.196044	1	0.900504	0.555712	0.72252
Ctsf	0.020215	0.197512	-0.182097	-0.00479939	1	0.689478	0.710851	0.997913
Ctsz	-0.018595	0.0506165	-0.0659475	0.00326407	1	0.924431	0.881178	0.998189
Cttn	0.145456	0.0541871	0.0870196	-0.00424908	1	0.918819	0.841046	0.997913
Ctu2	0.231519	-0.000965503	0.111948	-0.120537	1	0.998341	0.840693	0.86281
Cuedc2	0.0427662	-0.0233218	-0.00831752	-0.0744055	1	0.963836	0.988468	0.887626
Cul1	0.0790655	-0.12106	-0.0609693	-0.261095	1	0.584917	0.827068	0.187587
Cul2	0.00521159	-0.00887248	-0.168248	-0.182332	1	0.99098	0.663264	0.699426
Cul3	-0.0367504	0.0712955	-0.228746	-0.1207	1	0.854232	0.345921	0.754996
Cul4a	-0.0259322	0.229291	-0.231708	0.0235149	1	0.373315	0.383803	0.96806
Cul4b	-0.00108829	-0.105326	-0.0543826	-0.158621	1	0.817476	0.911468	0.738003
Cul5	-0.0134089	-0.107192	-0.00422035	-0.0980032	1	0.747304	0.994339	0.816738
Cul7	-0.135447	-0.144068	0.348488	0.339867	1	0.758598	0.286888	0.409114
Cuta	-0.0665171	0.124573	-0.0944089	0.0966813	1	0.790599	0.843005	0.872621
Cutc	0.190406	-0.280064	0.0728369	-0.397633	1	0.464633	0.898378	0.343557
Cux1	-0.183201	-0.0961536	-0.06257	0.0244772	1	0.814177	0.879651	0.968349
Cwc15	-0.00344926	0.0112269	-0.148336	-0.13366	1	0.981313	0.583859	0.699426
Cwc22	0.253031	-0.299287	0.219459	-0.332859	1	0.331109	0.552278	0.380611
Cwc25	-0.161264	0.0597436	-0.143101	0.0779069	1	0.897202	0.668054	0.876477
Cwc27	-0.0044117	-0.165702	0.034318	-0.126973	1	0.766827	0.962351	0.859855
Cwf19l1	-0.0276658	-0.214163	0.0710401	-0.115457	1	0.50198	0.871244	0.818861
Cwf19l2	-0.078556	-0.290311	0.0401156	-0.17164	1	0.445781	0.95215	0.775768
Cxxc1	0.102939	-0.183355	0.0977566	-0.188537	1	0.427661	0.745415	0.519649
Cyb5	-0.121148	0.269916	-0.0291138	0.36195	1	0.185047	0.94509	0.116776
Cyb561a3	-0.190315	0.0809935	-0.000144027	0.271164	1	0.881233	0.999779	0.532656
Cyb561d1	0.0548885	0.0220891	0.145286	0.112486	1	0.96898	0.714171	0.831152
Cyb5b	0.0502901	0.0502883	-0.153707	-0.153709	1	0.929378	0.690564	0.752908
Cyb5d2	-0.172532	0.0517561	-0.349169	-0.124881	1	0.925779	0.204472	0.807643
Cyb5r1	-0.0546304	-0.495762	0.451732	0.0106003	1	0.11854	0.19002	0.993172
Cyb5r3	-0.0587132	0.156762	-0.189296	0.0261794	1	0.362095	0.261445	0.944796
Cyb5r4	0.0865885	0.024026	-0.0927283	-0.155291	1	0.968095	0.844592	0.77118
Cyc1	0.0138503	-0.0395696	-0.116774	-0.170194	1	0.891334	0.557694	0.403434
Cycs	0.144492	0.108322	-0.0984973	-0.134667	1	0.857184	0.855148	0.833951
Cyfip1	-0.219301	0.657421	-0.614316	0.262406	1	0.0191451	0.0520689	0.645113
Cyhr1	-0.0277171	-0.0974695	0.199319	0.129566	1	0.781803	0.458199	0.741396
Cyld	0.0920142	0.136829	-0.0425518	0.0022631	1	0.559651	0.898378	0.998189
Cyp20a1	-0.041519	-0.506268	-0.0582024	-0.522951	1	0.0274767	0.907627	0.082789
Cyp4b1-ps2	0.00545939	0.576921	-0.0323408	0.539121	1	0.0154643	0.959136	0.0977173
Cyp51	-0.0795692	0.275516	-0.299992	0.0550929	1	0.550556	0.492813	0.950486
Cyth2	0.057829	0.0744758	-0.0361244	-0.0194777	1	0.829858	0.923331	0.97052
Cyth3	-0.000923792	0.319277	-0.13789	0.18231	1	0.185047	0.700001	0.648628
D030028A08Rik	-0.184532	-0.297915	-0.0193699	-0.132752	1	0.284311	0.974637	0.792287
D030056L22Rik	0.082388	-0.00948755	0.0843464	-0.00752921	1	0.990868	0.858356	0.994801
D10Jhu81e	0.0506988	-0.0713962	0.0957258	-0.0263691	1	0.850924	0.764818	0.962652
D10Wsu102e	-0.177391	-0.175205	-0.126808	-0.124622	1	0.588709	0.729255	0.792287
D11Wsu47e	-0.117137	-0.048767	-0.0754722	-0.00710262	1	0.916354	0.843001	0.993172
D15Ertd621e	0.0948855	0.108737	0.0142385	0.0280902	1	0.771934	0.97873	0.965307
D17Wsu104e	0.0857567	0.0446387	0.0089071	-0.032211	1	0.929008	0.986835	0.958383
D17Wsu92e	-0.147478	0.3451	-0.355093	0.137486	1	0.111517	0.130071	0.744613
D19Bwg1357e	-0.00392235	0.0156708	-0.147818	-0.128225	1	0.976273	0.648601	0.764148
D1Ertd622e	-0.0229309	0.18728	-0.170827	0.0393842	1	0.427034	0.502247	0.934906
D230025D16Rik	0.00562412	-0.0474948	0.199959	0.14684	1	0.918819	0.483405	0.71218
D2hgdh	-0.137286	0.0615592	0.0806873	0.279533	1	0.913076	0.863747	0.485477
D2Wsu81e	0.104519	-0.398184	0.208185	-0.294518	1	0.0739397	0.514521	0.390479
D3Ertd751e	0.186086	-0.0215104	-0.130554	-0.33815	1	0.969794	0.754383	0.347758
D430020J02Rik	0.148725	-0.179601	0.0662279	-0.262098	1	0.708896	0.909303	0.611215
D430042O09Rik	-0.282941	0.122071	-0.0787557	0.326256	1	0.830021	0.889625	0.485477
D5Ertd579e	-0.282615	0.244222	-0.35054	0.176296	1	0.355933	0.141002	0.648628
D6Wsu163e	0.081934	-0.146516	-0.0651179	-0.293568	1	0.613374	0.858356	0.273363
D8Ertd738e	-0.0710576	0.0595841	-0.210293	-0.0796515	1	0.87725	0.382622	0.849
D930015E06Rik	-0.190708	0.323769	-0.270437	0.24404	1	0.360296	0.488858	0.637417
Daam1	-0.0462648	0.0383348	-0.321471	-0.236871	1	0.943478	0.220337	0.518304
Daam2	-0.0789761	0.282416	-0.255538	0.105854	1	0.546093	0.588002	0.892828
Dad1	-0.029408	0.0439226	-0.181156	-0.107825	1	0.933205	0.574699	0.820477
Dag1	-0.00035054	0.145806	-0.206249	-0.0600927	1	0.699861	0.539529	0.920939
Daglb	1.38637	1.26099	0.206477	0.0810982	9.42e-18	5.44e-17	0.536923	0.878024
Dak	-0.126358	0.107706	-0.246198	-0.0121343	1	0.822686	0.468146	0.988912
Dalrd3	0.146855	0.222518	-0.0717818	0.00388049	1	0.415277	0.856833	0.997903
Dand5	-0.124657	0.172973	0.0738313	0.371461	1	0.673143	0.884288	0.322576
Dap	0.414305	0.0738576	0.279667	-0.0607805	1	0.908179	0.465625	0.935167
Dap3	0.00189871	-0.147239	-0.0324257	-0.181564	1	0.559645	0.931368	0.536173
Dapk1	-0.0396597	0.303557	0.128645	0.471862	1	0.476917	0.818994	0.288459
Dapk2	-0.115833	0.26165	-0.124627	0.252855	1	0.428644	0.773841	0.552993
Dapk3	0.00172553	0.0793425	-0.157	-0.0793827	1	0.854784	0.630503	0.872621
Dapp1	-0.260704	0.0462833	-0.241794	0.065194	1	0.934487	0.437957	0.912797
Dars	-0.004361	-0.199577	0.00615224	-0.189064	1	0.525282	0.993255	0.645113
Dars2	0.0591885	-0.0748809	-0.102794	-0.236863	1	0.827833	0.729255	0.366765
Daxx	0.0805292	0.03026	-0.0161705	-0.0664397	1	0.936371	0.966735	0.852728
Dazap1	0.0226389	-0.144805	0.0523831	-0.11506	1	0.364297	0.825318	0.61473
Dazap2	-0.0437963	0.157271	-0.075425	0.125643	1	0.449292	0.784828	0.663936
Dbf4	0.0370688	-0.0349331	0.111635	0.0396331	1	0.94822	0.761614	0.946542
Dbi	0.0584035	0.36636	-0.486827	-0.17887	1	0.257258	0.106799	0.751649
Dbnl	-0.0947716	0.0774748	-0.132529	0.0397169	1	0.835375	0.657893	0.937382
Dbr1	0.0793474	-0.010998	-0.0656505	-0.155996	1	0.979683	0.832508	0.58882
Dcaf10	-0.184474	0.0690746	-0.277077	-0.0235276	1	0.856267	0.202549	0.965977
Dcaf11	-0.163946	0.0787943	-0.165043	0.0776971	1	0.781469	0.438843	0.821228
Dcaf12	-0.300968	0.354109	-0.587377	0.0677003	1	0.281178	0.0372741	0.927456
Dcaf13	-0.0197413	-0.0987337	0.0219943	-0.0569981	1	0.798265	0.96535	0.915155
Dcaf15	-0.0373405	0.0420099	-0.0297177	0.0496326	1	0.916354	0.938859	0.910408
Dcaf17	0.0935047	-0.072825	0.169424	0.00309384	1	0.907417	0.705032	0.999166
Dcaf4	0.161784	0.028193	-0.0709601	-0.204551	1	0.966755	0.900053	0.707702
Dcaf5	0.0928643	0.0635276	0.343793	0.314457	1	0.915617	0.291345	0.453552
Dcaf6	-0.12251	0.291651	-0.0835868	0.330574	1	0.216108	0.828072	0.248777
Dcaf7	-0.129945	-0.21581	-0.0237432	-0.109608	1	0.327224	0.956754	0.771192
Dcaf8	-0.144556	0.100059	0.00696789	0.251583	1	0.805068	0.991105	0.462599
Dcakd	-0.0218215	0.0465094	0.0188046	0.0871354	1	0.947752	0.97876	0.900079
Dcbld2	-0.252272	-0.0992609	0.11209	0.265101	1	0.874602	0.840423	0.629786
Dck	0.0922585	0.0186465	-0.0566704	-0.130282	1	0.970754	0.895964	0.772713
Dclk2	-0.045193	0.0499058	-0.205131	-0.110032	1	0.944187	0.64863	0.872621
Dclre1a	0.127249	-0.0821358	0.0573636	-0.152021	1	0.805504	0.864775	0.642607
Dclre1b	-0.154862	0.130032	-0.301003	-0.0161091	1	0.623619	0.123444	0.974548
Dclre1c	0.0273789	-0.166958	0.246412	0.0520749	1	0.62412	0.411614	0.931682
Dcp1a	-0.0475495	0.0319094	0.00501619	0.0844751	1	0.953727	0.993521	0.864534
Dcp1b	-0.053071	-0.310345	0.117728	-0.139546	1	0.356381	0.804514	0.81586
Dcp2	0.108799	0.127051	-0.114561	-0.0963082	1	0.733904	0.760907	0.845496
Dcps	-0.0558093	-0.344215	0.157632	-0.130773	1	0.0347095	0.540929	0.697284
Dctn1	-0.108357	0.121183	-0.295715	-0.0661752	1	0.643206	0.118414	0.86822
Dctn2	-0.0235487	-0.230181	0.286061	0.0794288	1	0.29533	0.179119	0.849775
Dctn3	-0.0108414	0.120639	-0.172654	-0.0411733	1	0.578494	0.373369	0.913141
Dctn4	-0.105566	-0.129986	-0.0573257	-0.0817455	1	0.587434	0.850494	0.816738
Dctn5	0.0197644	0.0643465	0.0470248	0.0916069	1	0.862017	0.897782	0.816738
Dctn6	0.156745	-0.0379371	0.192597	-0.0020854	1	0.948005	0.574382	0.999248
Dctpp1	-0.0671864	0.205467	-0.446879	-0.174226	1	0.542594	0.0777724	0.701027
Dcun1d1	0.126344	0.121663	-0.12384	-0.128521	1	0.732398	0.723052	0.769322
Dcun1d2	-0.0799345	0.0297022	-0.220722	-0.111085	1	0.95676	0.459596	0.816738
Dcun1d5	0.0719801	0.0122534	-0.0834716	-0.143198	1	0.981678	0.821049	0.714492
Dda1	-0.0278269	-0.0792008	-0.106762	-0.158136	1	0.771492	0.659663	0.537702
Ddah1	-0.0980248	-0.164921	-0.20012	-0.267017	1	0.768642	0.681563	0.644522
Ddb1	-0.182982	-0.0796171	0.0344055	0.13777	1	0.86439	0.946793	0.770446
Ddc	-0.247411	-0.151422	-0.139266	-0.0432771	1	0.802845	0.802132	0.965307
Ddhd1	0.309995	0.72701	-0.36384	0.0531749	1	0.000487232	0.233356	0.938148
Ddhd2	0.200809	-0.346875	0.288462	-0.259221	1	0.1602	0.320337	0.485477
Ddi2	-0.052823	-0.0921047	-0.288169	-0.327451	1	0.86437	0.394504	0.409541
Ddit3	-0.150788	-0.665868	0.756423	0.241343	1	0.0153257	0.00929216	0.674877
Ddost	0.0821205	-0.00792823	0.00957257	-0.0804762	1	0.982092	0.978342	0.781358
Ddrgk1	0.0617596	-0.21957	0.510785	0.229455	1	0.502067	0.0353969	0.573645
Ddx1	-0.0172665	-0.135719	-0.0487832	-0.167236	1	0.671852	0.905474	0.648628
Ddx10	-0.119163	0.2156	-0.301744	0.0330195	1	0.45544	0.250022	0.958199
Ddx11	0.0245522	0.116601	-0.106826	-0.0147773	1	0.754322	0.773841	0.98149
Ddx17	0.0284929	-0.091905	0.198841	0.0784431	1	0.805068	0.463052	0.86281
Ddx18	0.141776	-0.165522	0.00636361	-0.300934	1	0.736892	0.993908	0.536173
Ddx19a	0.151259	-0.152484	0.0474856	-0.256257	1	0.540721	0.892323	0.306108
Ddx19b	-0.0679721	-0.319958	0.107266	-0.14472	1	0.39607	0.842788	0.8215
Ddx20	-0.041185	-0.196199	-0.0781919	-0.233206	1	0.392603	0.807347	0.391511
Ddx21	-0.156733	-0.366572	-0.14872	-0.358559	1	0.12726	0.68572	0.257911
Ddx23	-0.0509063	-0.124506	-0.0520438	-0.125644	1	0.625515	0.871658	0.693799
Ddx24	-0.0624548	0.125321	-0.269767	-0.081991	1	0.743935	0.343503	0.877043
Ddx26b	-0.0194779	-0.054523	0.339771	0.304726	1	0.939239	0.363115	0.53616
Ddx27	0.14336	-0.310691	0.283167	-0.170883	1	0.00808284	0.0435985	0.403435
Ddx28	0.0428574	-0.169443	0.0804413	-0.131859	1	0.681193	0.867879	0.816738
Ddx39	-0.00204669	0.0193657	-0.119514	-0.0981014	1	0.96341	0.672666	0.797476
Ddx39b	0.105496	-0.0940281	0.061752	-0.137772	1	0.764131	0.851534	0.67709
Ddx3x	0.0139371	-0.00376734	-0.0638512	-0.0815557	1	0.993789	0.853323	0.842818
Ddx3y	0.535027	-0.255014	0.638652	-0.15139	0.911375	0.538434	0.0298045	0.812583
Ddx41	-0.0127949	-0.0258626	0.00366594	-0.00940176	1	0.966023	0.997632	0.992202
Ddx42	0.0679645	0.02944	0.0100177	-0.0285068	1	0.938433	0.979964	0.947183
Ddx46	0.020409	-0.0579489	-0.0640928	-0.142451	1	0.857184	0.825523	0.609458
Ddx47	-0.037237	0.114886	-0.146033	0.0060897	1	0.485278	0.353218	0.988101
Ddx49	-0.018807	-0.152324	-0.152775	-0.286292	1	0.610301	0.614741	0.320402
Ddx5	0.102722	0.100921	0.0371742	0.0353735	1	0.676937	0.904166	0.930647
Ddx50	0.113084	-0.114188	0.280713	0.0534406	1	0.820423	0.413865	0.939001
Ddx51	0.139846	-0.0126809	0.031422	-0.121105	1	0.982488	0.95328	0.801437
Ddx52	0.0685217	-0.0939558	-0.084147	-0.246625	1	0.807676	0.822453	0.443086
Ddx54	-0.146704	-0.177814	-0.146057	-0.177166	1	0.605824	0.697558	0.684062
Ddx55	-0.0637291	-0.217351	0.0404786	-0.113143	1	0.52872	0.941077	0.833951
Ddx56	-0.0723672	-0.0582372	-0.143274	-0.129144	1	0.917899	0.723052	0.807643
Ddx59	0.230658	-0.196453	0.197957	-0.229153	1	0.535785	0.553649	0.545084
Ddx6	-0.105077	-0.0651202	-0.12825	-0.088294	1	0.87725	0.694044	0.844294
Deaf1	0.0030675	0.00379032	0.128117	0.12884	1	0.994573	0.741197	0.792491
Deb1	0.132759	-0.180293	0.0130311	-0.300021	1	0.711652	0.985066	0.54147
Dedd	-0.0410941	0.06804	-0.100463	0.00867155	1	0.829858	0.709214	0.986942
Dedd2	-0.197489	0.321433	-0.369216	0.149706	1	0.311634	0.237272	0.790712
Def8	-0.154312	0.0188182	-0.175091	-0.00196059	1	0.979139	0.684867	0.999689
Degs1	0.119269	0.0821577	-0.0191178	-0.0562294	1	0.77698	0.96038	0.886022
Dek	0.223912	0.0117714	7.6e-05	-0.212064	1	0.985013	0.999779	0.58882
Dennd1a	-0.341801	0.152398	-0.494523	-0.000323173	1	0.660854	0.0274934	0.999689
Dennd2c	-0.215658	0.267359	-0.429317	0.0537002	1	0.459657	0.157012	0.940566
Dennd4a	-0.253487	0.188375	-0.325447	0.116415	1	0.638233	0.31415	0.841392
Dennd4b	0.0118742	-0.341681	0.517106	0.16355	1	0.285016	0.0706366	0.772899
Dennd4c	0.0216179	-0.255595	0.121948	-0.155264	1	0.464633	0.788463	0.77779
Dennd5a	-0.0636852	-0.330145	0.508867	0.242408	1	0.282317	0.0600511	0.593708
Dennd6a	0.034561	-0.10299	0.107623	-0.0299284	1	0.774301	0.755937	0.960077
Denr	-0.0633245	-0.152353	-0.0860726	-0.175101	1	0.632126	0.821463	0.64687
Depdc1a	0.343648	-0.0551547	0.303043	-0.0957602	1	0.942399	0.465694	0.899305
Depdc1b	-0.119515	0.209609	-0.316178	0.0129457	1	0.430689	0.174282	0.983558
Depdc5	0.0164559	-0.132153	0.0278541	-0.120755	1	0.681974	0.953962	0.773594
Dera	-0.119559	-0.0317028	-0.102985	-0.015129	1	0.958515	0.814597	0.98416
Derl1	-0.0497775	-0.250937	0.218934	0.017775	1	0.347279	0.454393	0.976818
Derl2	0.125356	-0.10408	0.146435	-0.0830003	1	0.79997	0.679093	0.872621
Desi1	-0.0545708	-0.113575	-0.217182	-0.276187	1	0.652987	0.277277	0.201288
Desi2	-0.03014	-0.501683	0.296348	-0.175195	1	0.0054984	0.239417	0.648628
Det1	-0.111384	-0.20972	0.0430663	-0.0552692	1	0.454406	0.922805	0.92127
Dffa	-0.031078	-0.0309778	-0.112455	-0.112355	1	0.955553	0.761614	0.812681
Dffb	0.298603	0.0942218	0.238615	0.0342331	1	0.861346	0.525279	0.965349
Dgat1	0.0454025	-0.0694948	0.193712	0.0788143	1	0.925262	0.700267	0.92473
Dgcr14	0.0279152	0.0827985	-0.116304	-0.0614203	1	0.874176	0.791845	0.927456
Dgcr2	0.0381898	-0.0297276	0.0122473	-0.0556701	1	0.95676	0.981993	0.924045
Dgcr8	0.238523	-0.162532	0.291187	-0.109867	1	0.538171	0.175336	0.779352
Dgkd	0.00939397	-0.296587	0.291213	-0.0147679	1	0.169142	0.218716	0.980658
Dgkq	0.0207814	-0.0485457	0.20355	0.134223	1	0.932249	0.56871	0.797476
Dgkz	-0.0414933	-0.257651	0.277677	0.0615187	1	0.291125	0.268992	0.902079
Dguok	-0.132647	-0.142642	0.143723	0.133727	1	0.746744	0.739561	0.812583
Dhcr24	-0.279283	0.122515	-0.621063	-0.219265	1	0.793808	0.0121269	0.638453
Dhdds	-0.0749279	-0.109758	-0.0892658	-0.124096	1	0.753354	0.802299	0.764148
Dhfr	0.100868	-0.0618303	-0.109801	-0.272499	1	0.904993	0.785527	0.454549
Dhodh	0.223311	0.164412	0.0812618	0.0223621	1	0.759323	0.891248	0.980658
Dhps	-0.00200914	-0.0999454	-0.0761184	-0.174055	1	0.826515	0.862621	0.695422
Dhrs1	0.0811956	0.032747	-0.138946	-0.187395	1	0.95676	0.733756	0.681447
Dhrs11	-0.106426	0.129125	-0.0430453	0.192505	1	0.774991	0.937789	0.686163
Dhrs13	4.61e-05	0.251819	-0.330464	-0.0786911	1	0.18894	0.0790136	0.837147
Dhrs4	0.0550822	0.0704006	-0.102523	-0.0872043	1	0.844644	0.733756	0.8215
Dhrs7b	0.0566854	-0.125194	0.203592	0.0217126	1	0.760837	0.557505	0.974548
Dhx15	0.0270083	-0.158321	-0.0638315	-0.249161	1	0.525055	0.84749	0.328318
Dhx16	-0.0126985	0.0761041	0.0223624	0.111165	1	0.776644	0.949688	0.697284
Dhx29	-0.0318182	-0.141034	-0.256915	-0.36613	1	0.774301	0.50328	0.377162
Dhx30	0.045353	0.171012	-0.173146	-0.0474873	1	0.475746	0.489918	0.917657
Dhx32	-0.0947119	0.111791	-0.241459	-0.0349569	1	0.8159	0.483405	0.963381
Dhx33	-0.148015	-0.114831	-0.145304	-0.11212	1	0.798848	0.714358	0.833951
Dhx34	-0.1421	-0.413996	0.15388	-0.118016	1	0.0694526	0.676551	0.816738
Dhx35	0.057378	0.0296902	0.0317963	0.00410855	1	0.959512	0.955956	0.997913
Dhx36	-0.0635392	-0.0931557	-0.0590668	-0.0886834	1	0.849111	0.902231	0.876477
Dhx37	-0.104099	-0.119476	-0.0961918	-0.111568	1	0.774301	0.821049	0.825957
Dhx38	0.037766	0.0896161	-0.0650057	-0.0131556	1	0.830021	0.872843	0.98416
Dhx40	-0.186705	0.156316	-0.195059	0.147962	1	0.650469	0.550692	0.739376
Dhx57	0.0679771	0.331368	-0.114065	0.149327	1	0.256667	0.796808	0.777825
Dhx8	-0.189054	0.108987	-0.316665	-0.0186241	1	0.77698	0.207166	0.976104
Dhx9	0.0761925	-0.0303804	-0.0775799	-0.184153	1	0.943478	0.804363	0.532784
Diablo	0.000881886	-0.108676	0.0414845	-0.0680736	1	0.761264	0.922805	0.890036
Diap1	-0.0669686	0.0405049	-0.246199	-0.138726	1	0.928318	0.294824	0.705099
Diap3	-0.120324	-0.00421693	-0.130863	-0.0147555	1	0.994069	0.741471	0.98416
Dicer1	-0.0819146	-0.152672	-0.0705962	-0.141354	1	0.643206	0.860172	0.741396
Dido1	0.0231178	0.0278789	-0.065539	-0.0607779	1	0.955654	0.863654	0.901122
Diexf	0.0310012	-0.180545	0.0393875	-0.172159	1	0.629403	0.942869	0.720028
Dimt1	0.00338735	-0.0448887	0.145955	0.0976792	1	0.944136	0.741647	0.876477
Dip2b	-0.132678	-0.00237637	-0.030471	0.0998307	1	0.996908	0.964476	0.886498
Dirc2	-0.0734933	0.272581	-0.103732	0.242342	1	0.394737	0.818994	0.57282
Dis3	0.00305977	-0.186209	-0.0719305	-0.2612	1	0.544513	0.858356	0.439044
Dis3l	-0.0731531	-0.122516	-0.147616	-0.196979	1	0.625515	0.546971	0.453552
Dis3l2	0.0101634	-0.143313	-0.00867435	-0.162151	1	0.729068	0.989515	0.741362
Dkc1	-0.0233077	-0.147501	-0.0129419	-0.137135	1	0.54427	0.975934	0.66291
Dlat	0.0835002	-0.0243044	0.0237018	-0.0841028	1	0.957172	0.957817	0.833951
Dld	0.109998	-0.0452985	0.105724	-0.0495724	1	0.916185	0.739842	0.918471
Dleu2	-0.0930727	0.348867	-0.2386	0.20334	1	0.282008	0.552271	0.697284
Dlg1	-0.0272649	-0.193051	0.121652	-0.0441338	1	0.591516	0.7724	0.947303
Dlgap5	0.0440612	0.260822	-0.156101	0.0606598	1	0.229067	0.583859	0.895585
Dlk1	-0.0617739	0.283379	-0.0308865	0.314266	1	0.419755	0.958694	0.462599
Dlst	0.036707	-0.0725625	0.0216569	-0.0876126	1	0.7182	0.934041	0.704902
Dmap1	0.00870322	0.0269377	-0.0694308	-0.0511963	1	0.960979	0.872054	0.933134
Dmtf1	0.166036	0.0904907	0.175296	0.0997515	1	0.862717	0.659272	0.86606
Dmtn	-0.170618	0.15831	-0.363604	-0.0346761	1	0.519613	0.0477776	0.940858
Dmwd	0.0668806	-0.0672899	0.0476635	-0.0865069	1	0.875984	0.911703	0.853815
Dmxl1	-0.0258521	0.0781464	-0.162438	-0.0584394	1	0.841858	0.576028	0.902171
Dna2	0.0881836	-0.196208	0.0159316	-0.26846	1	0.277529	0.96616	0.184397
Dnaaf2	0.0904111	-0.186159	0.00245073	-0.274119	1	0.538171	0.998571	0.398278
Dnaja1	0.334734	0.791914	0.252195	0.709375	1	0.00261478	0.576527	0.0369027
Dnaja2	0.0191162	0.0174042	-0.080643	-0.082355	1	0.962619	0.757922	0.802534
Dnaja3	-0.0206199	-0.17031	0.0312816	-0.118409	1	0.523573	0.941923	0.763679
Dnaja4	-0.0390634	0.924876	-0.0572031	0.906736	1	0.000112231	0.928399	0.00109052
Dnajb1	0.111819	0.972112	-0.110633	0.74966	1	3.18e-05	0.842788	0.0171547
Dnajb11	0.100302	0.182552	-0.187033	-0.104783	1	0.216062	0.239417	0.664708
Dnajb12	-0.130625	0.0448083	-0.0923926	0.0830411	1	0.943478	0.84749	0.893487
Dnajb13	-0.435897	0.414686	-0.540846	0.309737	1	0.295645	0.128203	0.593999
Dnajb14	-0.0271306	-0.212973	0.164341	-0.0215023	1	0.661907	0.749683	0.98149
Dnajb2	-0.201721	0.464772	-0.37466	0.291833	1	0.0878532	0.246635	0.510653
Dnajb3	-0.0126945	0.174886	0.0421425	0.229723	1	0.523573	0.9183	0.462599
Dnajb4	-0.215299	0.38742	-0.283919	0.3188	1	0.0505219	0.260307	0.268752
Dnajb6	0.366744	0.0739132	0.238418	-0.0544124	1	0.914598	0.590662	0.947303
Dnajb9	0.194985	0.358364	0.22483	0.388209	1	0.380127	0.644338	0.444373
Dnajc1	0.0105413	-0.0548669	-0.00709667	-0.0725048	1	0.933329	0.993277	0.918155
Dnajc10	0.0269207	-0.0536997	-0.122557	-0.203177	1	0.902704	0.702061	0.535884
Dnajc11	-0.0160546	0.173482	-0.183051	0.00648541	1	0.347137	0.33867	0.990624
Dnajc13	-0.040267	-0.140237	-0.198217	-0.298187	1	0.700231	0.539463	0.366765
Dnajc14	-0.0246515	-0.014689	-0.151628	-0.141666	1	0.969121	0.506837	0.624741
Dnajc15	0.0408434	0.0622325	-0.40082	-0.379431	1	0.924985	0.222252	0.364863
Dnajc16	0.0385838	0.0260632	-0.0352658	-0.0477864	1	0.966333	0.953575	0.945651
Dnajc17	0.18047	0.0191474	0.0713526	-0.08997	1	0.979125	0.895969	0.890864
Dnajc18	-0.113693	-0.0354592	-0.0934498	-0.0152159	1	0.959876	0.861847	0.987237
Dnajc19	0.204428	-0.0984084	0.0966597	-0.206177	1	0.855632	0.843005	0.675571
Dnajc2	0.0118299	0.0265796	-0.124726	-0.109976	1	0.96341	0.760861	0.835711
Dnajc21	0.272641	-0.254743	0.186546	-0.340838	1	0.325789	0.554695	0.239338
Dnajc24	0.092112	0.06973	0.0270213	0.00463936	1	0.918819	0.971054	0.997913
Dnajc28	-0.200641	0.13821	0.0519882	0.390839	1	0.80777	0.935837	0.391511
Dnajc3	0.0496285	-0.124696	-0.0373554	-0.21168	1	0.67356	0.924138	0.476943
Dnajc30	-0.105488	0.0129876	-0.136836	-0.0183604	1	0.982974	0.722908	0.978115
Dnajc4	0.160582	-0.0422789	0.137578	-0.0652827	1	0.943478	0.743381	0.918592
Dnajc5	-0.116114	-0.0972586	0.0032173	0.0220729	1	0.761264	0.99686	0.966291
Dnajc7	0.204322	-0.00911572	0.0767965	-0.136642	1	0.987903	0.836633	0.725466
Dnajc8	0.162162	-0.107886	0.177647	-0.0924005	1	0.746744	0.52197	0.825345
Dnajc9	0.138418	0.0207344	0.0896801	-0.0280035	1	0.964494	0.796239	0.961488
Dnase1l1	0.0323959	-0.00213949	0.10785	0.0733151	1	0.997318	0.832635	0.918471
Dnase2a	0.0324595	-0.132016	0.515392	0.350916	1	0.816268	0.106156	0.453047
Dnlz	-0.160129	-0.288952	-0.0978775	-0.2267	1	0.297911	0.814597	0.571432
Dnm1l	0.0212393	0.146016	-0.18321	-0.0584331	1	0.548801	0.424666	0.887563
Dnm2	-0.0113677	0.0152857	-0.00897128	0.0176822	1	0.975359	0.985029	0.975148
Dnmt1	0.0278886	-0.10784	-0.115075	-0.250804	1	0.775308	0.748813	0.453552
Dnpep	-0.0300405	-0.152409	-0.0147687	-0.137138	1	0.587091	0.975934	0.710964
Dnph1	-0.133753	-0.156179	-0.203379	-0.225805	1	0.677939	0.555712	0.582265
Dnttip1	-0.0590067	0.345475	-0.17917	0.225311	1	0.205368	0.631976	0.601804
Dnttip2	0.0561584	-0.0406104	-0.000786396	-0.0975552	1	0.920334	0.999092	0.797914
Dock7	-0.110365	-0.313871	-0.172271	-0.375777	1	0.353737	0.689847	0.347758
Dock8	-0.21092	0.421281	-0.395935	0.236266	1	0.0414467	0.101471	0.511966
Dohh	-0.132346	0.313511	-0.290881	0.154975	1	0.326902	0.392967	0.777825
Dok1	-0.184663	0.32081	-0.438251	0.0672231	1	0.0926672	0.0212644	0.880884
Dok4	0.059974	0.3362	-0.0818832	0.194343	1	0.123082	0.833421	0.595808
Dolpp1	0.0120133	0.0878136	0.0136265	0.0894268	1	0.827656	0.979153	0.849271
Donson	0.0894683	-0.133378	0.0789627	-0.143883	1	0.680077	0.833421	0.714492
Dopey1	0.0249403	-0.317935	-0.0023642	-0.34524	1	0.205085	0.998571	0.26896
Dopey2	-0.123173	0.107404	0.137532	0.368109	1	0.84807	0.768713	0.374402
Dos	-0.0726971	0.0447985	-0.171023	-0.0535275	1	0.951486	0.715019	0.946053
Dot1l	-0.0540015	-0.102839	-0.0835642	-0.132402	1	0.805068	0.840297	0.773594
Dpagt1	9.62e-05	-0.219602	0.285319	0.0656215	1	0.512141	0.359977	0.916185
Dpcd	0.191635	0.281577	-0.21862	-0.128678	1	0.499561	0.630503	0.850213
Dpf2	-0.0967651	-0.183155	0.114794	0.0284046	1	0.279144	0.595049	0.941114
Dpf3	0.0195143	-0.0182036	0.236369	0.198652	1	0.980415	0.566128	0.716676
Dph2	-0.136275	-0.183259	-0.048657	-0.0956411	1	0.710138	0.939686	0.893288
Dph3	-0.121872	0.0169071	-0.239688	-0.100909	1	0.963812	0.189776	0.752908
Dph5	0.122293	-0.12197	0.0665871	-0.177676	1	0.810828	0.901046	0.741362
Dph6	0.08598	-0.382605	0.135823	-0.332762	1	0.219641	0.773242	0.444373
Dph7	0.217243	-0.0828883	0.2414	-0.0587316	1	0.895709	0.568047	0.939916
Dpm1	-0.180571	0.00337054	-0.0508633	0.133078	1	0.993373	0.865879	0.647627
Dpm2	-0.0333328	-0.0314125	0.0599759	0.0618961	1	0.942056	0.857416	0.885124
Dpm3	-0.0970739	0.0296028	0.0226722	0.149349	1	0.962791	0.973652	0.792491
Dpp3	-0.0583284	0.11135	-0.378837	-0.209159	1	0.779882	0.12256	0.58882
Dpp8	-0.0356062	-0.0323012	-0.166102	-0.162797	1	0.934487	0.456971	0.553337
Dpp9	-0.0609241	-0.0773505	-0.140831	-0.157258	1	0.771492	0.50818	0.532002
Dpy19l1	0.0362098	0.144057	-0.172909	-0.0650616	1	0.629682	0.551194	0.890036
Dpy30	0.201329	-0.0467221	0.119421	-0.128631	1	0.925262	0.739842	0.771192
Dqx1	0.250506	0.0824401	0.320707	0.152641	1	0.912028	0.453455	0.830483
Dr1	0.0277717	0.0627702	-0.0135644	0.0214342	1	0.881007	0.978342	0.97052
Drap1	0.0593832	0.0380786	-0.0710923	-0.0923968	1	0.928937	0.832806	0.81445
Drg1	0.0747514	0.0523406	-0.0262822	-0.0486929	1	0.904039	0.954628	0.924271
Drg2	0.00520885	-0.130376	-0.0268907	-0.162476	1	0.637952	0.949688	0.616896
Drosha	-0.0395437	-0.0378926	-0.221443	-0.219792	1	0.913772	0.228574	0.318875
Dscc1	0.162876	-0.274392	0.0436823	-0.393585	1	0.252528	0.920092	0.124667
Dscr3	0.21726	0.132239	0.109718	0.0246977	1	0.792186	0.827549	0.975148
Dsn1	0.0545124	0.0254697	0.111748	0.0827053	1	0.954628	0.697598	0.830472
Dst	-0.0542676	-0.282782	0.352956	0.124441	1	0.54151	0.392967	0.871827
Dstn	-0.0577001	0.253539	-0.314148	-0.00290908	1	0.501621	0.368064	0.999166
Dstyk	-0.0315769	0.302903	-0.168752	0.165727	1	0.309996	0.663264	0.736387
Dtd1	0.14425	-0.255397	0.0989359	-0.300712	1	0.501079	0.844766	0.49871
Dtd2	0.0520129	0.0429625	0.013883	0.00483268	1	0.94822	0.982218	0.997913
Dtl	0.2637	-0.0892192	0.0526349	-0.300284	1	0.798135	0.887152	0.24009
Dtnb	0.01061	-0.0383036	-0.0236185	-0.0725321	1	0.951486	0.969252	0.902448
Dtnbp1	0.0799641	-0.0204615	-0.0463816	-0.146807	1	0.971274	0.928186	0.770717
Dtwd1	0.118721	-0.0193048	0.208312	0.0702867	1	0.969257	0.498386	0.893288
Dtwd2	-0.0439305	-0.172261	-0.212884	-0.341215	1	0.710117	0.606989	0.428225
Dtx2	-0.0842218	0.17142	0.0472119	0.302853	1	0.682034	0.93295	0.472593
Dtx3	0.150666	-0.155539	0.700293	0.394088	1	0.753698	0.010498	0.347758
Dtx3l	-0.265303	0.420813	-0.579997	0.106119	1	0.280916	0.0945319	0.893487
Dtymk	0.133038	-0.0640548	0.0392507	-0.157842	1	0.871887	0.923115	0.654543
Dus1l	0.121774	-0.0808227	0.0429168	-0.15968	1	0.81791	0.908597	0.629485
Dus2	-0.0328053	0.0530662	0.124468	0.21034	1	0.929378	0.779197	0.649751
Dus3l	0.100907	-0.0314936	0.187017	0.0546163	1	0.960979	0.646356	0.938148
Dusp1	0.115217	0.687216	-0.180109	0.391889	1	0.00992978	0.711662	0.391511
Dusp11	-0.0472645	-0.216518	0.0669326	-0.102321	1	0.127965	0.780367	0.691423
Dusp16	-0.250996	0.0825557	0.17317	0.506722	1	0.89298	0.704893	0.170434
Dusp8	-0.162013	0.228357	0.195652	0.586022	1	0.505634	0.594773	0.0273527
Dut	0.189888	-0.288538	0.340772	-0.137654	1	0.348099	0.254376	0.79553
Dvl1	0.126882	-0.0667663	0.41126	0.217611	1	0.92517	0.253419	0.711759
Dvl3	-0.0547074	-0.243214	0.0464114	-0.142095	1	0.38418	0.919685	0.751663
Dxo	0.190074	0.00563024	0.0965264	-0.0879174	1	0.993012	0.818994	0.872277
Dym	-0.0743703	-0.0680723	-0.125791	-0.119493	1	0.889425	0.743533	0.808257
Dync1h1	-0.309056	0.125793	-0.421344	0.0135043	1	0.718433	0.0520689	0.983132
Dync1i2	0.0694652	0.00815795	0.051767	-0.00954025	1	0.990761	0.905039	0.990144
Dync1li1	-0.169226	0.0273518	-0.360287	-0.163709	1	0.94654	0.0327377	0.553337
Dync1li2	0.0137872	0.0817187	-0.091862	-0.0239304	1	0.774301	0.735755	0.959563
Dync2h1	-0.175888	0.113281	-0.288718	0.000451675	1	0.81703	0.380809	0.999689
Dynll1	-0.0641057	0.102238	-0.207154	-0.0408102	1	0.781469	0.456971	0.940566
Dynll2	-0.0203269	0.0721265	-0.271957	-0.179504	1	0.813695	0.129813	0.483156
Dynlrb1	0.0475118	0.213117	-0.201556	-0.0359501	1	0.353737	0.413887	0.941953
Dynlt3	0.0316229	-0.258017	0.402838	0.113198	1	0.230735	0.042984	0.778485
Dyrk1a	-0.161973	0.0671363	-0.249302	-0.0201936	1	0.868166	0.306203	0.97199
Dyrk1b	-0.125768	0.260731	-0.218165	0.168335	1	0.427661	0.555712	0.737787
Dyrk3	-0.237504	0.38234	-0.470114	0.149731	1	0.27496	0.154728	0.816738
Dzip3	-0.0248715	-0.0760992	0.0899738	0.0387461	1	0.886389	0.846126	0.956856
E130308A19Rik	-0.100942	-0.238525	0.380561	0.242977	1	0.455618	0.168039	0.554258
E130309D02Rik	-0.132329	-0.290557	-0.0735428	-0.231771	1	0.0660508	0.796239	0.320402
E130309D14Rik	-0.415354	0.236071	-0.375932	0.275493	1	0.556734	0.260307	0.559225
E2f1	0.17448	0.282147	-0.194632	-0.0869643	1	0.0894224	0.365437	0.807643
E2f2	-0.286549	0.251141	-0.579391	-0.0417019	1	0.357001	0.00524747	0.944796
E2f3	0.186144	-0.147829	-0.0111477	-0.34512	1	0.678331	0.983057	0.263978
E2f4	-0.0197502	0.0552358	-0.0685954	0.00639062	1	0.892567	0.84572	0.993404
E2f5	-0.105032	-0.137787	0.304935	0.27218	1	0.731912	0.303325	0.478966
E2f6	0.226716	0.141391	0.0399079	-0.0454169	1	0.60945	0.9183	0.926687
E2f7	0.0079546	0.0124684	-0.136516	-0.132002	1	0.980172	0.646356	0.721683
E2f8	0.0933569	0.0230684	-0.0547695	-0.125058	1	0.962721	0.892406	0.769322
E430025E21Rik	-0.0729257	-0.061888	-0.232274	-0.221236	1	0.894395	0.416382	0.540845
E4f1	-0.0807873	0.126126	0.187652	0.394565	1	0.792889	0.643465	0.282264
Eaf1	-0.0603535	-0.0335447	-0.133405	-0.106596	1	0.94822	0.687824	0.812583
Eapp	0.0473902	-0.0646762	0.0958635	-0.0162029	1	0.866667	0.766369	0.976104
Ebag9	0.196432	-0.0610513	0.302202	0.0447185	1	0.912841	0.331933	0.947183
Ebna1bp2	0.152369	-0.0352524	0.0157519	-0.17187	1	0.94355	0.975934	0.647627
Ebp	-0.00891089	-0.117554	0.00554019	-0.103103	1	0.744403	0.993277	0.8215
Ecd	-0.0776498	-0.161575	-0.155205	-0.239129	1	0.578599	0.603152	0.443086
Ece1	-0.00701105	0.386891	-0.505348	-0.111446	1	0.293603	0.134433	0.879384
Ech1	0.167349	0.0754586	-0.0334242	-0.125314	1	0.857825	0.942628	0.770629
Echdc1	0.106775	-0.0121611	-0.110244	-0.22918	1	0.989803	0.841478	0.684122
Echs1	-0.012075	-0.13706	0.0901555	-0.0348294	1	0.774301	0.856191	0.965645
Eci1	-0.158219	-0.218376	-0.0477014	-0.107858	1	0.472454	0.918809	0.82627
Eci2	0.0565192	-0.0028292	0.223122	0.163774	1	0.996908	0.591326	0.784065
Ecsit	0.0470426	-0.0442807	-0.218236	-0.309559	1	0.935632	0.493209	0.359061
Ect2	0.0462408	0.2591	-0.191952	0.0209068	1	0.20028	0.432966	0.968307
Edc3	-0.144419	0.03866	-0.123816	0.0592626	1	0.934495	0.700922	0.901122
Edc4	0.0432999	0.0594311	-0.0296891	-0.0135579	1	0.888094	0.94775	0.98149
Edem1	-0.00651751	0.136317	-0.118409	0.0244253	1	0.733918	0.772202	0.971974
Edem2	-0.0687444	0.0170689	-0.037864	0.0479493	1	0.972726	0.932559	0.931083
Edem3	-0.0845327	0.148899	-0.0901739	0.143258	1	0.577418	0.775825	0.674877
Edf1	-0.123644	0.13719	-0.441594	-0.18076	1	0.591077	0.00899032	0.534819
Edrf1	-0.0935061	0.118532	-0.106722	0.105316	1	0.70237	0.737652	0.794075
Eea1	0.0120132	0.082186	-0.231339	-0.161166	1	0.787942	0.26004	0.578194
Eed	0.137812	0.076467	0.120022	0.0586771	1	0.839608	0.700551	0.899263
Eef1a1	0.0172578	-0.434413	0.268646	-0.183024	1	0.128573	0.468146	0.736371
Eef1b2	0.01443	-0.158403	0.216446	0.0436128	1	0.722678	0.578126	0.953648
Eef1d	-0.0467651	0.120924	-0.244279	-0.0765901	1	0.568452	0.135427	0.807643
Eef1e1	0.110023	-0.211732	0.261715	-0.0600407	1	0.557477	0.432627	0.92954
Eef1g	0.100538	-0.121931	0.137993	-0.0844764	1	0.85797	0.805959	0.924045
Eef2	-0.232833	-0.387327	0.0388754	-0.115619	1	0.00581247	0.906385	0.714492
Eef2k	-0.195566	0.197624	-0.487334	-0.0941441	1	0.503645	0.0235662	0.842989
Eefsec	-0.118929	-0.213055	-0.162108	-0.256234	1	0.392502	0.574395	0.387498
Efcab14	-0.0410088	-0.0373233	-0.116663	-0.112978	1	0.937931	0.723052	0.787918
Efhd2	-0.104109	0.230865	-0.247582	0.087392	1	0.175122	0.169881	0.794381
Efr3a	-0.00430208	-0.0821206	-0.252993	-0.330812	1	0.877676	0.46571	0.391511
Eftud1	-0.00929613	0.103792	-0.28834	-0.175252	1	0.851821	0.42223	0.749956
Eftud2	-0.0172067	0.0198981	-0.325417	-0.288312	1	0.957172	0.0355163	0.119382
Egfl7	0.0244908	-0.0820918	0.409759	0.303176	1	0.87528	0.151138	0.450976
Egln1	-0.0507198	-0.253272	0.448318	0.245766	1	0.421515	0.0846851	0.547249
Egln2	0.0330849	-0.15454	0.0929091	-0.0947157	1	0.71356	0.842788	0.872621
Ehbp1l1	0.0415799	0.325674	-0.230858	0.0532363	1	0.123082	0.382718	0.919638
Ehd1	-0.310974	-0.0724825	-0.0730486	0.165443	1	0.897507	0.881438	0.748419
Ehd4	-0.177093	-0.0181221	-0.415656	-0.256685	1	0.969257	0.0489579	0.407374
Ehhadh	0.0690141	-0.0195526	-0.0710869	-0.159654	1	0.979139	0.900053	0.792287
Ehmt1	0.0185537	-0.0670945	0.0457328	-0.0399153	1	0.841755	0.892323	0.930487
Ehmt2	0.166996	0.206764	0.166319	0.206088	1	0.635158	0.723052	0.710733
Ei24	0.0317427	-0.0109333	-0.0267542	-0.0694302	1	0.987681	0.96051	0.901122
Eid1	0.281367	-0.126002	0.457981	0.0506127	1	0.729664	0.0405163	0.930647
Eif1	0.0684795	-0.362277	0.428062	-0.00269443	1	0.237442	0.153487	0.999248
Eif1a	-0.107972	-0.00336213	-0.0308432	0.0737666	1	0.996592	0.959447	0.909684
Eif1ad	0.0635881	-0.0658883	0.0648366	-0.0646397	1	0.827964	0.821078	0.855069
Eif1ax	-0.0826929	-0.0560417	-0.224987	-0.198336	1	0.899125	0.39003	0.558411
Eif1b	0.146508	0.0947923	0.165257	0.113541	1	0.848048	0.665571	0.831554
Eif2a	-0.0697331	-0.239405	-0.0183699	-0.188042	1	0.380974	0.97437	0.629786
Eif2ak1	-0.305462	0.176637	-0.418082	0.0640171	1	0.591516	0.0807448	0.908701
Eif2ak2	-0.0513261	0.340244	-0.316675	0.0748953	1	0.398794	0.44353	0.92983
Eif2ak3	0.0559825	-0.232592	0.19385	-0.0947249	1	0.474801	0.591362	0.868286
Eif2ak4	-0.155404	-0.148758	0.0660211	0.0726667	1	0.669637	0.876073	0.890864
Eif2b1	0.0642385	-0.0100523	-0.0849847	-0.159276	1	0.987374	0.825722	0.685502
Eif2b2	0.100146	0.00143571	-0.132294	-0.231005	1	0.997511	0.691971	0.485214
Eif2b3	0.00501688	-0.379432	0.111967	-0.272483	1	0.228124	0.823688	0.564311
Eif2b4	-0.0034946	-0.185703	-0.0132504	-0.195459	1	0.45174	0.976478	0.530416
Eif2b5	-0.0332889	-0.0067155	-0.0341932	-0.00761975	1	0.992422	0.942356	0.992646
Eif2d	0.00943118	-0.0893255	0.0214187	-0.077338	1	0.781469	0.959504	0.849
Eif2s1	0.0640495	-0.269231	0.091955	-0.241325	1	0.419616	0.84572	0.589671
Eif2s2	0.0928019	-0.674715	0.42048	-0.347037	1	0.00808284	0.210108	0.450976
Eif2s3x	0.107264	-0.0709517	0.0229247	-0.155291	1	0.925638	0.975934	0.825236
Eif2s3y	0.562872	-0.178225	0.536152	-0.204945	0.738018	0.724279	0.0945319	0.725987
Eif3a	0.0285169	-0.30796	-0.0514079	-0.387885	1	0.110139	0.889625	0.082789
Eif3b	-0.0761076	-0.0974923	-0.271175	-0.29256	1	0.76549	0.20964	0.24324
Eif3c	-0.16292	-0.742772	0.269731	-0.31012	1	4.85e-07	0.272492	0.267057
[truncated: 5,501 more rows]
