# Supplementary material for: HRI coordinates translation necessary for protein homeostasis and mitochondrial function in erythropoiesis
Source: eLife. 2019 Apr 29;8:e46976. doi: 10.7554/eLife.46976 (PMC6533081; doi:10.7554/eLife.46976)
Supplement: Supplementary file 2. [file elife-46976-supp2.xls]

## Sheet: a
RPs				non RPs
Uniquely upregulated in Hri-/--Fe compared to Wt-Fe (18)	Overlapped (38)	Uniquely mTORC-regulated (13)		Uniquely upregulated in Hri-/--Fe compared to Wt-Fe (12)	Overlapped (8)	Uniquely mTORC-regulated (35)
Rpl29	Rplp1	Rps24		Tram1	Fau	Ybx1
Rps17	Rps15A	Rpl34		Srprb	Eef2	Cox7A2L
Rpl27A	Rps21	Rpl7		Sec61A1	Eif3E	Odc1
Rpl28	Rps3A	Rps10		Spcs1	Eif3F	Prcp
Rps7	Rpl13A	Rpl39		Ssr1	Eif3H	Eif4B
Rpl11	Rpl19	Rpl6		Ssr2	Pabpc1	Qars
Rps12	Rps11	Rpl9		Spcs2	Eef1G	Ipo5
Rpl15	Rpl10A	Rps25		Ddost	Eef1B2	Hsp90Ab1
Rps8	Rplp0	Rps15		Eif3I		Wdr89
Rps28	Rpl18	Rpl23A		Eif2S1		Akr1B3
Rps13	Rps19	Rpl37A		Eif2S3		2700060E02Rik
Rpl35A	Rpl35	Rpl38		Eif4E		Nme2
Rpl13	Rps9	Rpl36A				Vim
Rps29	Rpl24					Col4A1
Rps27L	Rpl22					Stx12
Rpl36Al	Rpl7A					Abcb1B
Rpl3	Rpl8					Gyg
Rps23	Rps5					Pabpc4
	Rpl5					Ssr4
	Rps26					Chchd3
	Rps27A					Cct4
	Rpl21					Cct2
	Rps18					Snx5
	Rpl37					Glud1
	Rpl14					Eif2A
	Rps20					Taf10
	Rps3					Nup35
	Rps4X					Srp72
	Rpl32					Eef1A1
	Rpl18A					Tpt1
	Rplp2					Gnb2L1
	Rps16					Npm1
	Rpl30					Eef1D
	Rpl12					Eef1E1
	Rpl23					Hnrnpa1
	Rpl4
	Rps14
	Rpl41

## Sheet: b
Category	Gene Symbol	Log2(FoldChange of TE)	Adjust p value
Mitochondrial RPs	Mrpl13	0.663696	0.0265078
	Mrpl57	1.01788	0.00187724
	Mrps18c	1.01416	0.000260516
	Mrpl20	0.935896	0.00155654
	Mrpl52	0.786508	0.0228424
	Mrpl4	1.77255	1.4e-08
	Mrpl54	1.10251	0.00132496
	Mrpl53	1.28976	1.52e-05
	Mrpl17	1.19805	0.00063063
	Mrps30	0.817205	0.00598792
	Mrps14	0.665199	0.00684279
Complex I	Ndufb9	0.566769	0.00605995
	Ndufv2	1.10312	4.28e-08
	Ndufc2	0.655533	0.0373066
	Ndufs3	0.79708	0.00911395
	Ndufa7	1.31582	2.47e-05
	Ndufs4	0.780977	0.00423571
	Ndufc1	1.68412	4.15e-06
Complex II	Sucla2	0.789591	0.0181238
	Uqcc2	0.751988	0.0129737
Complex IV	Cox5b	1.1631	2.22e-08
Complex V	Atp5o	0.373512	0.0726001
	Atp5c1	1.70327	2.16e-20
	Atp5g3	0.624585	0.000691877
Others	Atp6v0b	1.4243	6.8e-06
	Vdac2	0.78849	0.00748352
	Isca2	1.02806	0.00374869
	Slc25a5	1.75734	1.25e-12
	Bola3	2.2268	6.13e-14
Note: TE of Hri-/--Fe vs Wt-Fe
