# Supplementary material for: HRI coordinates translation necessary for protein homeostasis and mitochondrial function in erythropoiesis
Source: eLife. 2019 Apr 29;8:e46976. doi: 10.7554/eLife.46976 (PMC6533081; doi:10.7554/eLife.46976)
Supplement: Supplementary file 3. — Supplementary File 3a. DNA sequence of qPCR primers. Supplementary File 3b. List of antibodies used for western blot analyses. Supplementary File 3c. DNA sequences of shRNA oligonucleotides. [file elife-46976-supp3.xls]

## Sheet: a
Gene symbol	Forward 5' to 3’	Reward 5’to 3’
Grb10	GTGGTGGAGATTCTAACCGACA	ACCTCTCTAATCCCAGTTGTGG
Atf4	GCCAGATGAGCTCTTGACCAC	CTGGAGTGGAAGACAGAACCC
Atf5	GGGTCATTTTAGCTCTGTGAGAGAA	ATTTGTGCCCATAACCCCTAGA
Shmt2	TGGCAAGAGATACTACGGAGG	GCAGGTCCAACCCCATGAT
Gapdh	ATGGTGAAGGTCGGTGTGAA	GAGTGGAGTCATACTGGAAC
mtDNA	GCCCATGACCAACATAACTG	CCTTGACGGCTATGTTGATG
gDNA (Hbb-b1)	CCAGGGAGAAATATGCTTGTCA	GTGAGCAGATTGGCCCTTAC

## Sheet: b
Symbol	Brand	Cat#
ATF4	Cell Signaling Technology	11815
GRB10	Millipore	07-2182
HRI	JJ Chen Lab	Han et al., 2001
Cyclin D3	Cell Signaling Technology	2936
SHMT2	Cell Signaling Technology	12762
p4EBP1 (Thr37/46)	Cell Signaling Technology	2855
4EBP1	Cell Signaling Technology	9644
pS6(Ser240/244)	Cell Signaling Technology	5364
S6	Cell Signaling Technology	2217
β-Actin	Cell Signaling Technology	3700
eIF2a	Cell Signaling Technology	5324
Puromycin	Developmental Studies Hybridoma Bank	PMY-2A4

## Sheet: c
No.	Oligo Sequence(5'to 3')
Grb10_shRNA1	aaaaCCAGAGTAATCCAAAGGCGTTCTCGAGAACGCCTTTGGATTACTCTGG
Grb10_shRNA2	aaaaGCAGTTAAGAACTGCATCTCTCTCGAGAGAGATGCAGTTCTTAACTGC
Grb10_shRNA3	aaaaCCCTGGAATAACCTTGACAATCTCGAGATTGTCAAGGTTATTCCAGGG
Grb10_shRNA4	aaaaGCACACGGATGAATATCCTAACTCGAGTTAGGATATTCATCCGTGTGC
Grb10_shRNA5	aaaaCCATGCCAAGTGAGAGCAAATCTCGAGATTTGCTCTCACTTGGCATGG
Grb10_shRNA6	aaaaGAACAACGATATTAACTCGTCCGTCTCGAGACGGACGAGTTAATATCGTTGTTC
Grb10_shRNA7	aaaaCCGTCCAGGTCTGTGGACAAACTCGAGTTTGTCCACAGACCTGGACGG
Grb10_shRNA8	aaaaGCCTTCAGACTGCTCAAGTACCTCGAGGTACTTGAGCAGTCTGAAGGC
Control_shRNA	aaaaCAACAAGATGAAGAGCACCAACTCGAGTTGGTGCTCTTCATCTTGTTG
Note:
DNA sequences of shRNA1 to shRNA5 were obtained from the Genetic Perturbation Platform of Broad Institute. DNA sequences of shRNA6, shRNA7 and shRNA8 were obtained from (Doiron et al. 2012; Zacharek et al. 2011; Park et al. 2013), respectively.
